# Supplementary material for: Pupillometry reveals the physiological underpinnings of the aversion to holes
Source: PeerJ. 2018 Jan 4;6:e4185. doi: 10.7717/peerj.4185 (PMC5756615; doi:10.7717/peerj.4185)
Supplement: Data S1 [file peerj-06-4185-s001.xlsx]

## Sheet: Experiment 1 - Data
Experiment 1 - All trial data
Subj	Trial	Image	Category	% Pupil Size Change from Baseline
2000	1	Images\butterfly49.tif	Control	6.36951
2000	2	Images\spider8.tif	Threat	14.2161
2000	3	Images\Trypophobic10.tif	Holes	2.69482
2000	4	Images\snake43.tif	Threat	-2.29667
2000	5	Images\frog24.tif	Control	-0.0949653
2000	6	Images\Object9.tif	Control	-22.1018
2000	7	Images\spider29.tif	Threat	5.61524
2000	8	Images\snake22.tif	Threat	-7.59122
2000	9	Images\Object10.tif	Control	-20.5361
2000	10	Images\Object7.tif	Control	0.0662418
2000	11	Images\Object8.tif	Control	24.8552
2000	12	Images\Trypophobic20.tif	Holes	-33.0428
2000	13	Images\Object1.tif	Control	-13.9415
2000	14	Images\Trypophobic8.tif	Holes	-6.65281
2000	15	Images\Trypophobic5.tif	Holes	-4.79388
2000	16	Images\spider21.tif	Threat	-0.488079
2000	17	Images\Object2.tif	Control	-2.11887
2000	18	Images\butterfly30.tif	Control	2.29742
2000	19	Images\Trypophobic12.tif	Holes	-7.34151
2000	20	Images\Trypophobic17.tif	Holes	14.9095
2000	21	Images\Trypophobic18.tif	Holes	-4.17521
2000	22	Images\frog28.tif	Control	-1.25142
2000	23	Images\Object5.tif	Control	4.79965
2000	24	Images\spider32.tif	Threat	-7.5689
2000	25	Images\spider22.tif	Threat	20.2093
2000	26	Images\snake26.tif	Threat	-17.9054
2000	27	Images\Object6.tif	Control	-16.9592
2000	28	Images\Trypophobic15.tif	Holes	-28.8206
2000	29	Images\spider24.tif	Threat	4.56338
2000	30	Images\Trypophobic1.tif	Holes	-7.84374
2000	31	Images\snake57.tif	Threat	-7.80298
2000	32	Images\frog27.tif	Control	-15.2823
2000	33	Images\spider1.tif	Threat	-19.355
2000	34	Images\Trypophobic7.tif	Holes	-13.2178
2000	35	Images\snake25.tif	Threat	-21.1978
2000	36	Images\butterfly9.tif	Control	-12.7917
2000	37	Images\Trypophobic11.tif	Holes	4.98826
2000	38	Images\frog32.tif	Control	-19.0165
2000	39	Images\Trypophobic19.tif	Holes	-0.681169
2000	40	Images\spider55.tif	Threat	45.3878
2000	41	Images\snake4.tif	Threat	2.02856
2000	42	Images\butterfly42.tif	Control	-22.1209
2000	43	Images\spider14.tif	Threat	-15.4045
2000	44	Images\frog30.tif	Control	-33.3178
2000	45	Images\spider42.tif	Threat	-10.296
2000	46	Images\Object4.tif	Control	-7.12017
2000	47	Images\Trypophobic14.tif	Holes	-11.9394
2000	48	Images\Trypophobic4.tif	Holes	-7.20531
2000	49	Images\snake40.tif	Threat	17.2339
2000	50	Images\snake32.tif	Threat	-1.97715
2000	51	Images\Object3.tif	Control	-7.45898
2000	52	Images\Trypophobic16.tif	Holes	-9.73853
2000	53	Images\snake41.tif	Threat	7.03996
2000	54	Images\Trypophobic3.tif	Holes	-2.29224
2000	55	Images\Trypophobic13.tif	Holes	-31.2346
2000	56	Images\Trypophobic2.tif	Holes	-11.0818
2000	57	Images\snake28.tif	Threat	-15.8469
2000	58	Images\Trypophobic9.tif	Holes	-4.20354
2000	59	Images\Trypophobic6.tif	Holes	-32.397
2000	60	Images\butterfly19.tif	Control	-17.7903
2001	1	Images\Object9.tif	Control	-1.21397
2001	2	Images\Trypophobic17.tif	Holes	-29.7841
2001	3	Images\snake32.tif	Threat	-21.5953
2001	4	Images\Trypophobic15.tif	Holes	-19.9042
2001	5	Images\Trypophobic20.tif	Holes	-10.6605
2001	6	Images\Trypophobic4.tif	Holes	-43.7263
2001	7	Images\butterfly42.tif	Control	-3.88168
2001	8	Images\snake4.tif	Threat	1.17862
2001	9	Images\spider29.tif	Threat	-14.7047
2001	10	Images\Trypophobic6.tif	Holes	-9.03806
2001	11	Images\snake43.tif	Threat	16.5491
2001	12	Images\spider42.tif	Threat	-50.0561
2001	13	Images\Trypophobic16.tif	Holes	-3.7214
2001	14	Images\snake25.tif	Threat	-32.2213
2001	15	Images\spider32.tif	Threat	-5.93451
2001	16	Images\snake57.tif	Threat	-6.7305
2001	17	Images\spider24.tif	Threat	-3.7782
2001	18	Images\butterfly9.tif	Control	32.1331
2001	19	Images\snake41.tif	Threat	-0.4191
2001	20	Images\Object8.tif	Control	-4.04495
2001	21	Images\Trypophobic2.tif	Holes	4.68125
2001	22	Images\snake26.tif	Threat	7.91466
2001	23	Images\spider22.tif	Threat	26.8209
2001	24	Images\Trypophobic19.tif	Holes	33.8848
2001	25	Images\frog28.tif	Control	-8.87494
2001	26	Images\Object6.tif	Control	26.6744
2001	27	Images\Object10.tif	Control	2.68491
2001	28	Images\frog24.tif	Control	-13.5126
2001	29	Images\butterfly19.tif	Control	-19.2496
2001	30	Images\Trypophobic7.tif	Holes
2001	31	Images\Trypophobic18.tif	Holes
2001	32	Images\Trypophobic12.tif	Holes
2001	33	Images\Object7.tif	Control
2001	34	Images\spider8.tif	Threat
2001	35	Images\butterfly49.tif	Control
2001	36	Images\Object5.tif	Control
2001	37	Images\frog32.tif	Control
2001	38	Images\spider21.tif	Threat
2001	39	Images\Trypophobic3.tif	Holes
2001	40	Images\Object3.tif	Control
2001	41	Images\snake22.tif	Threat
2001	42	Images\Trypophobic10.tif	Holes
2001	43	Images\spider55.tif	Threat
2001	44	Images\Trypophobic8.tif	Holes
2001	45	Images\spider1.tif	Threat
2001	46	Images\Object2.tif	Control
2001	47	Images\Object4.tif	Control
2001	48	Images\frog30.tif	Control
2001	49	Images\Trypophobic14.tif	Holes
2001	50	Images\Trypophobic9.tif	Holes
2001	51	Images\snake40.tif	Threat
2001	52	Images\Trypophobic5.tif	Holes
2001	53	Images\butterfly30.tif	Control
2001	54	Images\Trypophobic13.tif	Holes
2001	55	Images\Trypophobic11.tif	Holes
2001	56	Images\frog27.tif	Control
2001	57	Images\snake28.tif	Threat
2001	58	Images\Trypophobic1.tif	Holes
2001	59	Images\spider14.tif	Threat
2001	60	Images\Object1.tif	Control
2002	1	Images\spider55.tif	Threat	16.2983
2002	2	Images\Object2.tif	Control	16.8053
2002	3	Images\Object10.tif	Control	11.4196
2002	4	Images\Trypophobic10.tif	Holes	-4.06611
2002	5	Images\snake41.tif	Threat	-19.0745
2002	6	Images\Object7.tif	Control	26.9986
2002	7	Images\spider24.tif	Threat	-17.4849
2002	8	Images\Trypophobic17.tif	Holes	-10.317
2002	9	Images\snake57.tif	Threat	-14.1686
2002	10	Images\frog32.tif	Control	-21.3175
2002	11	Images\Trypophobic3.tif	Holes	-11.325
2002	12	Images\Trypophobic12.tif	Holes	-1.8235
2002	13	Images\frog30.tif	Control	1.84215
2002	14	Images\snake4.tif	Threat	22.7434
2002	15	Images\spider14.tif	Threat	-28.1929
2002	16	Images\butterfly19.tif	Control	-1.06082
2002	17	Images\Object8.tif	Control	-32.3981
2002	18	Images\spider21.tif	Threat	-1.09126
2002	19	Images\snake22.tif	Threat	1.18087
2002	20	Images\spider22.tif	Threat	-5.1235
2002	21	Images\Trypophobic15.tif	Holes	-13.761
2002	22	Images\Trypophobic19.tif	Holes	-26.5485
2002	23	Images\frog27.tif	Control	7.24506
2002	24	Images\Object4.tif	Control	26.233
2002	25	Images\Object9.tif	Control	-13.0705
2002	26	Images\Trypophobic11.tif	Holes	-9.73907
2002	27	Images\Trypophobic2.tif	Holes	-19.631
2002	28	Images\Trypophobic20.tif	Holes	-2.29705
2002	29	Images\butterfly49.tif	Control	28.2136
2002	30	Images\spider29.tif	Threat	-7.63433
2002	31	Images\Object3.tif	Control	3.63569
2002	32	Images\Trypophobic4.tif	Holes	46.6712
2002	33	Images\butterfly42.tif	Control	-30.5484
2002	34	Images\snake26.tif	Threat	-25.735
2002	35	Images\frog24.tif	Control	4.44115
2002	36	Images\Trypophobic13.tif	Holes	6.50594
2002	37	Images\butterfly9.tif	Control	-20.2558
2002	38	Images\spider42.tif	Threat	2.94124
2002	39	Images\Trypophobic6.tif	Holes	12.2462
2002	40	Images\snake43.tif	Threat	-10.258
2002	41	Images\Object1.tif	Control	-17.223
2002	42	Images\Trypophobic8.tif	Holes	-13.9237
2002	43	Images\Trypophobic16.tif	Holes	49.4973
2002	44	Images\snake25.tif	Threat	-12.4046
2002	45	Images\Object6.tif	Control	4.96491
2002	46	Images\spider1.tif	Threat	17.7426
2002	47	Images\Trypophobic7.tif	Holes	39.7655
2002	48	Images\butterfly30.tif	Control	1.95659
2002	49	Images\Object5.tif	Control	-26.7757
2002	50	Images\Trypophobic5.tif	Holes	8.05345
2002	51	Images\spider32.tif	Threat	-12.6951
2002	52	Images\Trypophobic18.tif	Holes	12.5405
2002	53	Images\Trypophobic14.tif	Holes	-8.12258
2002	54	Images\spider8.tif	Threat	-20.2604
2002	55	Images\snake32.tif	Threat	-8.14316
2002	56	Images\frog28.tif	Control	37.2462
2002	57	Images\snake28.tif	Threat	-18.7523
2002	58	Images\Trypophobic1.tif	Holes	-0.881671
2002	59	Images\snake40.tif	Threat	26.377
2002	60	Images\Trypophobic9.tif	Holes	-3.40421
2003	1	Images\Trypophobic7.tif	Holes	-12.7677
2003	2	Images\Object2.tif	Control	1.49727
2003	3	Images\frog32.tif	Control	2.2802
2003	4	Images\Trypophobic16.tif	Holes	-21.6071
2003	5	Images\frog28.tif	Control	-8.72125
2003	6	Images\Object9.tif	Control	36.409
2003	7	Images\snake43.tif	Threat	-35.2698
2003	8	Images\butterfly9.tif	Control	-21.9488
2003	9	Images\Trypophobic12.tif	Holes	10.5074
2003	10	Images\snake41.tif	Threat	22.3079
2003	11	Images\snake32.tif	Threat	-6.86176
2003	12	Images\spider21.tif	Threat	-11.7949
2003	13	Images\Trypophobic6.tif	Holes	-29.1335
2003	14	Images\Trypophobic9.tif	Holes	30.5268
2003	15	Images\Trypophobic17.tif	Holes	-34.8289
2003	16	Images\frog30.tif	Control	15.784
2003	17	Images\Trypophobic11.tif	Holes	-30.6745
2003	18	Images\spider24.tif	Threat	21.0021
2003	19	Images\Trypophobic20.tif	Holes	-19.3455
2003	20	Images\frog24.tif	Control	18.2558
2003	21	Images\Trypophobic10.tif	Holes	-9.20544
2003	22	Images\spider8.tif	Threat	7.31791
2003	23	Images\butterfly49.tif	Control	27.2263
2003	24	Images\Trypophobic13.tif	Holes	-7.67203
2003	25	Images\butterfly19.tif	Control	-11.4477
2003	26	Images\spider29.tif	Threat	-14.5885
2003	27	Images\Trypophobic15.tif	Holes	-30.3657
2003	28	Images\Trypophobic3.tif	Holes	-18.4778
2003	29	Images\butterfly30.tif	Control
2003	30	Images\Object10.tif	Control	-20.5649
2003	31	Images\spider55.tif	Threat
2003	32	Images\snake22.tif	Threat	-13.8528
2003	33	Images\snake28.tif	Threat
2003	34	Images\butterfly42.tif	Control
2003	35	Images\snake57.tif	Threat	-10.9585
2003	36	Images\snake4.tif	Threat
2003	37	Images\Object1.tif	Control	-14.4355
2003	38	Images\Object3.tif	Control	64.644
2003	39	Images\spider22.tif	Threat	-9.26844
2003	40	Images\Trypophobic2.tif	Holes	-23.3793
2003	41	Images\spider32.tif	Threat	-24.8752
2003	42	Images\Object8.tif	Control
2003	43	Images\spider42.tif	Threat
2003	44	Images\Trypophobic1.tif	Holes
2003	45	Images\spider14.tif	Threat
2003	46	Images\snake26.tif	Threat
2003	47	Images\spider1.tif	Threat
2003	48	Images\frog27.tif	Control
2003	49	Images\Object7.tif	Control	-32.4696
2003	50	Images\Trypophobic14.tif	Holes	-21.9775
2003	51	Images\Object4.tif	Control
2003	52	Images\Object6.tif	Control
2003	53	Images\Trypophobic4.tif	Holes	-19.4878
2003	54	Images\snake25.tif	Threat	-14.7754
2003	55	Images\Trypophobic5.tif	Holes	-33.8921
2003	56	Images\Trypophobic18.tif	Holes	-17.4658
2003	57	Images\Trypophobic19.tif	Holes	-10.9535
2003	58	Images\Object5.tif	Control	-18.8189
2003	59	Images\snake40.tif	Threat	-3.69533
2003	60	Images\Trypophobic8.tif	Holes
2004	1	Images\Trypophobic11.tif	Holes	37.4861
2004	2	Images\frog30.tif	Control	-18.4542
2004	3	Images\Trypophobic19.tif	Holes	-7.00411
2004	4	Images\Object5.tif	Control	25.7726
2004	5	Images\frog27.tif	Control	-6.81607
2004	6	Images\Object7.tif	Control	9.40814
2004	7	Images\Trypophobic16.tif	Holes	-2.64844
2004	8	Images\snake32.tif	Threat	1.83072
2004	9	Images\Trypophobic18.tif	Holes	48.2001
2004	10	Images\Trypophobic17.tif	Holes	-26.7341
2004	11	Images\snake22.tif	Threat	-5.9929
2004	12	Images\Object2.tif	Control	45.251
2004	13	Images\Trypophobic6.tif	Holes	-3.33211
2004	14	Images\Trypophobic14.tif	Holes	26.4057
2004	15	Images\Trypophobic3.tif	Holes	-12.1247
2004	16	Images\spider29.tif	Threat	44.5603
2004	17	Images\Trypophobic15.tif	Holes	0.774637
2004	18	Images\Trypophobic8.tif	Holes	36.5768
2004	19	Images\snake28.tif	Threat	22.9386
2004	20	Images\butterfly42.tif	Control	-5.18627
2004	21	Images\Trypophobic13.tif	Holes	12.1623
2004	22	Images\Trypophobic20.tif	Holes	-30.125
2004	23	Images\frog32.tif	Control	-5.14021
2004	24	Images\spider42.tif	Threat	14.3103
2004	25	Images\Trypophobic5.tif	Holes	32.2484
2004	26	Images\Trypophobic2.tif	Holes	-10.307
2004	27	Images\snake57.tif	Threat	13.1218
2004	28	Images\snake41.tif	Threat	28.9467
2004	29	Images\butterfly30.tif	Control	15.1149
2004	30	Images\Object1.tif	Control	9.28758
2004	31	Images\Trypophobic10.tif	Holes	-15.7823
2004	32	Images\spider14.tif	Threat	17.3741
2004	33	Images\spider21.tif	Threat	49.1713
2004	34	Images\Object6.tif	Control	-2.91329
2004	35	Images\Object8.tif	Control	38.6129
2004	36	Images\snake40.tif	Threat	1.47265
2004	37	Images\Trypophobic12.tif	Holes	-1.91432
2004	38	Images\spider8.tif	Threat	13.8351
2004	39	Images\spider22.tif	Threat	11.5917
2004	40	Images\Object3.tif	Control	46.6255
2004	41	Images\Trypophobic4.tif	Holes	-21.1419
2004	42	Images\snake26.tif	Threat	11.4559
2004	43	Images\spider32.tif	Threat	-4.91428
2004	44	Images\butterfly19.tif	Control	-27.6305
2004	45	Images\frog28.tif	Control	13.7688
2004	46	Images\frog24.tif	Control	-25.1074
2004	47	Images\spider1.tif	Threat	13.8984
2004	48	Images\snake4.tif	Threat	56.1543
2004	49	Images\Object9.tif	Control	26.2662
2004	50	Images\butterfly9.tif	Control	32.0631
2004	51	Images\spider24.tif	Threat	48.1034
2004	52	Images\Trypophobic1.tif	Holes	4.91682
2004	53	Images\Object10.tif	Control	38.3883
2004	54	Images\snake43.tif	Threat	-32.6319
2004	55	Images\butterfly49.tif	Control	23.648
2004	56	Images\Trypophobic7.tif	Holes	-51.7445
2004	57	Images\spider55.tif	Threat	22.358
2004	58	Images\snake25.tif	Threat	-4.63613
2004	59	Images\Trypophobic9.tif	Holes	-13.949
2004	60	Images\Object4.tif	Control	56.0155
2005	1	Images\frog28.tif	Control	-18.8601
2005	2	Images\Trypophobic11.tif	Holes	-10.7114
2005	3	Images\Trypophobic17.tif	Holes	-17.6682
2005	4	Images\Object6.tif	Control	-3.71921
2005	5	Images\snake32.tif	Threat	-3.21268
2005	6	Images\snake26.tif	Threat	-32.5819
2005	7	Images\spider1.tif	Threat	-13.143
2005	8	Images\snake41.tif	Threat	-23.2327
2005	9	Images\Trypophobic12.tif	Holes	31.4761
2005	10	Images\Trypophobic15.tif	Holes	-51.5386
2005	11	Images\Trypophobic20.tif	Holes	-4.89296
2005	12	Images\snake43.tif	Threat	-1.91189
2005	13	Images\Trypophobic2.tif	Holes	-17.1201
2005	14	Images\snake40.tif	Threat	2.68321
2005	15	Images\Trypophobic4.tif	Holes	31.2481
2005	16	Images\spider21.tif	Threat	-35.1061
2005	17	Images\spider24.tif	Threat	45.6584
2005	18	Images\Object8.tif	Control	-42.3737
2005	19	Images\snake22.tif	Threat	3.4337
2005	20	Images\spider32.tif	Threat	-18.8515
2005	21	Images\frog24.tif	Control	10.8308
2005	22	Images\snake28.tif	Threat	-1.05689
2005	23	Images\frog32.tif	Control	-16.7103
2005	24	Images\Trypophobic10.tif	Holes	12.2848
2005	25	Images\Trypophobic14.tif	Holes	-13.1048
2005	26	Images\spider8.tif	Threat	-11.4186
2005	27	Images\snake57.tif	Threat	-11.4197
2005	28	Images\Trypophobic7.tif	Holes	-13.7164
2005	29	Images\snake25.tif	Threat	-15.489
2005	30	Images\Object7.tif	Control	4.53699
2005	31	Images\Object2.tif	Control	-5.96254
2005	32	Images\spider42.tif	Threat	-24.3291
2005	33	Images\butterfly49.tif	Control	-1.66904
2005	34	Images\snake4.tif	Threat	-32.4482
2005	35	Images\Trypophobic19.tif	Holes	11.8611
2005	36	Images\Trypophobic8.tif	Holes	1.59879
2005	37	Images\Trypophobic5.tif	Holes	-12.2684
2005	38	Images\Trypophobic16.tif	Holes	-1.59717
2005	39	Images\Object9.tif	Control	-10.6009
2005	40	Images\Object10.tif	Control	-17.3469
2005	41	Images\spider55.tif	Threat	64.2888
2005	42	Images\spider22.tif	Threat	-6.3002
2005	43	Images\Trypophobic13.tif	Holes	-38.3162
2005	44	Images\butterfly9.tif	Control	-18.918
2005	45	Images\spider29.tif	Threat	19.674
2005	46	Images\frog27.tif	Control	-2.89427
2005	47	Images\Object3.tif	Control	-3.07845
2005	48	Images\Trypophobic3.tif	Holes	-36.6602
2005	49	Images\Trypophobic18.tif	Holes	-15.8427
2005	50	Images\spider14.tif	Threat	-15.8497
2005	51	Images\Object1.tif	Control	-34.5871
2005	52	Images\butterfly19.tif	Control	58.0597
2005	53	Images\butterfly30.tif	Control	-21.4295
2005	54	Images\Object4.tif	Control	-2.14345
2005	55	Images\butterfly42.tif	Control	36.7001
2005	56	Images\Trypophobic9.tif	Holes	26.8261
2005	57	Images\Trypophobic6.tif	Holes	-57.3995
2005	58	Images\Trypophobic1.tif	Holes	0.893046
2005	59	Images\Object5.tif	Control	-23.2023
2005	60	Images\frog30.tif	Control	-20.9184
2006	1	Images\spider42.tif	Threat	-17.9136
2006	2	Images\snake41.tif	Threat	-24.499
2006	3	Images\Trypophobic2.tif	Holes	-19.4786
2006	4	Images\snake25.tif	Threat	4.06145
2006	5	Images\snake32.tif	Threat	-45.5218
2006	6	Images\spider55.tif	Threat	7.21643
2006	7	Images\Trypophobic6.tif	Holes	-53.3932
2006	8	Images\Trypophobic18.tif	Holes	35.4037
2006	9	Images\snake22.tif	Threat	-27.6694
2006	10	Images\Object10.tif	Control	-7.89594
2006	11	Images\Trypophobic4.tif	Holes	10.1576
2006	12	Images\snake26.tif	Threat	-28.0306
2006	13	Images\snake28.tif	Threat	-22.3322
2006	14	Images\spider29.tif	Threat	0.436579
2006	15	Images\Trypophobic20.tif	Holes	-23.621
2006	16	Images\Object5.tif	Control	8.54406
2006	17	Images\Trypophobic11.tif	Holes	-29.2523
2006	18	Images\snake4.tif	Threat	-3.19663
2006	19	Images\frog30.tif	Control	2.33747
2006	20	Images\frog27.tif	Control	-18.7243
2006	21	Images\Trypophobic5.tif	Holes	-26.9371
2006	22	Images\spider1.tif	Threat	39.4107
2006	23	Images\Object9.tif	Control	-25.7752
2006	24	Images\spider21.tif	Threat	2.59384
2006	25	Images\Object4.tif	Control	-18.9245
2006	26	Images\spider22.tif	Threat	10.1221
2006	27	Images\Object8.tif	Control	-3.23126
2006	28	Images\Trypophobic15.tif	Holes	-39.3295
2006	29	Images\Trypophobic1.tif	Holes	21.751
2006	30	Images\Trypophobic8.tif	Holes	-21.9184
2006	31	Images\butterfly42.tif	Control	-15.6523
2006	32	Images\Trypophobic7.tif	Holes	5.44951
2006	33	Images\snake57.tif	Threat	57.3966
2006	34	Images\butterfly49.tif	Control	13.6023
2006	35	Images\Trypophobic3.tif	Holes	-17.3376
2006	36	Images\Trypophobic12.tif	Holes	46.7809
2006	37	Images\spider8.tif	Threat	-1.74491
2006	38	Images\Object1.tif	Control	26.4979
2006	39	Images\frog24.tif	Control	-1.37877
2006	40	Images\Trypophobic10.tif	Holes	26.7262
2006	41	Images\snake40.tif	Threat	-18.55
2006	42	Images\Object6.tif	Control	-95.5542
2006	43	Images\spider14.tif	Threat
2006	44	Images\butterfly9.tif	Control	-1.98508
2006	45	Images\frog28.tif	Control	-16.6582
2006	46	Images\Trypophobic16.tif	Holes	60.5824
2006	47	Images\snake43.tif	Threat	-30.44
2006	48	Images\Object3.tif	Control	-1.7039
2006	49	Images\Trypophobic17.tif	Holes	-17.9959
2006	50	Images\Trypophobic19.tif	Holes	0.245206
2006	51	Images\spider24.tif	Threat	13.0117
2006	52	Images\butterfly19.tif	Control	-20.9708
2006	53	Images\Object2.tif	Control	6.16424
2006	54	Images\Object7.tif	Control	-1.49273
2006	55	Images\Trypophobic13.tif	Holes
2006	56	Images\Trypophobic9.tif	Holes	56.1377
2006	57	Images\spider32.tif	Threat	-4.13212
2006	58	Images\Trypophobic14.tif	Holes
2006	59	Images\butterfly30.tif	Control	-8.50707
2006	60	Images\frog32.tif	Control	-17.2478
2007	1	Images\Object2.tif	Control	12.5251
2007	2	Images\Object7.tif	Control	-21.3805
2007	3	Images\spider21.tif	Threat	-13.1503
2007	4	Images\spider55.tif	Threat	28.1789
2007	5	Images\spider1.tif	Threat	9.0311
2007	6	Images\snake32.tif	Threat	0.878367
2007	7	Images\snake22.tif	Threat	-0.968532
2007	8	Images\butterfly30.tif	Control	-9.41696
2007	9	Images\Trypophobic16.tif	Holes	8.17688
2007	10	Images\snake28.tif	Threat	-21.7777
2007	11	Images\Object1.tif	Control	-17.8156
2007	12	Images\frog28.tif	Control	-14.9979
2007	13	Images\spider32.tif	Threat	-3.93667
2007	14	Images\snake43.tif	Threat	2.27976
2007	15	Images\spider24.tif	Threat	11.9607
2007	16	Images\Trypophobic13.tif	Holes	-14.8732
2007	17	Images\Object3.tif	Control	55.8219
2007	18	Images\Object10.tif	Control	-15.9254
2007	19	Images\butterfly49.tif	Control	1.28981
2007	20	Images\snake41.tif	Threat	-2.68902
2007	21	Images\Trypophobic11.tif	Holes	-2.58691
2007	22	Images\spider14.tif	Threat	-14.6019
2007	23	Images\Trypophobic14.tif	Holes	-16.2547
2007	24	Images\snake57.tif	Threat	38.3738
2007	25	Images\Trypophobic3.tif	Holes	-16.2557
2007	26	Images\Trypophobic12.tif	Holes	-14.4273
2007	27	Images\Object9.tif	Control	0.0164404
2007	28	Images\Trypophobic8.tif	Holes	9.989
2007	29	Images\frog24.tif	Control	-30.6724
2007	30	Images\butterfly42.tif	Control	-0.74661
2007	31	Images\Trypophobic15.tif	Holes	-28.7241
2007	32	Images\Trypophobic19.tif	Holes	-15.3802
2007	33	Images\Object6.tif	Control	1.33763
2007	34	Images\Trypophobic2.tif	Holes	32.2975
2007	35	Images\Trypophobic6.tif	Holes	-16.0285
2007	36	Images\spider8.tif	Threat	14.065
2007	37	Images\Trypophobic1.tif	Holes	-2.35765
2007	38	Images\Trypophobic10.tif	Holes	-6.37161
2007	39	Images\Trypophobic9.tif	Holes	5.79861
2007	40	Images\frog27.tif	Control	6.37386
2007	41	Images\butterfly9.tif	Control	-1.87187
2007	42	Images\snake25.tif	Threat	29.6723
2007	43	Images\Trypophobic7.tif	Holes	11.9078
2007	44	Images\Trypophobic4.tif	Holes	18.5371
2007	45	Images\snake4.tif	Threat	27.7104
2007	46	Images\snake40.tif	Threat	2.72476
2007	47	Images\Trypophobic18.tif	Holes	24.1302
2007	48	Images\Object4.tif	Control	-21.1178
2007	49	Images\frog32.tif	Control	-16.1613
2007	50	Images\snake26.tif	Threat	13.7498
2007	51	Images\spider29.tif	Threat	18.7581
2007	52	Images\frog30.tif	Control	-20.7635
2007	53	Images\spider42.tif	Threat	-1.53847
2007	54	Images\Object5.tif	Control	24.473
2007	55	Images\Object8.tif	Control	-17.9481
2007	56	Images\Trypophobic17.tif	Holes	6.60215
2007	57	Images\Trypophobic5.tif	Holes	42.9371
2007	58	Images\spider22.tif	Threat	23.9581
2007	59	Images\Trypophobic20.tif	Holes	14.497
2007	60	Images\butterfly19.tif	Control	-1.59452
2008	1	Images\snake41.tif	Threat	-18.5
2008	2	Images\Object5.tif	Control	7.8655
2008	3	Images\Trypophobic7.tif	Holes	-9.13892
2008	4	Images\Object3.tif	Control	8.65513
2008	5	Images\Object4.tif	Control	0.359658
2008	6	Images\frog24.tif	Control	10.4461
2008	7	Images\Object8.tif	Control	0.920674
2008	8	Images\snake40.tif	Threat	-5.01701
2008	9	Images\Object9.tif	Control	-18.5412
2008	10	Images\frog27.tif	Control	-14.76
2008	11	Images\Object6.tif	Control	20.0591
2008	12	Images\snake26.tif	Threat	7.02608
2008	13	Images\spider55.tif	Threat	24.0928
2008	14	Images\Trypophobic15.tif	Holes	-25.1387
2008	15	Images\spider14.tif	Threat	21.2428
2008	16	Images\Trypophobic8.tif	Holes	1.94213
2008	17	Images\Trypophobic5.tif	Holes	7.97717
2008	18	Images\Object2.tif	Control	34.8197
2008	19	Images\Object10.tif	Control	-12.6768
2008	20	Images\Trypophobic3.tif	Holes	1.24077
2008	21	Images\snake57.tif	Threat	18.2785
2008	22	Images\spider42.tif	Threat	-23.417
2008	23	Images\spider32.tif	Threat	-22.5307
2008	24	Images\snake32.tif	Threat	-9.5844
2008	25	Images\Trypophobic13.tif	Holes	-14.5161
2008	26	Images\butterfly9.tif	Control	10.4064
2008	27	Images\snake4.tif	Threat	9.94675
2008	28	Images\butterfly42.tif	Control	19.7155
2008	29	Images\frog32.tif	Control	-17.9801
2008	30	Images\Trypophobic12.tif	Holes	28.5773
2008	31	Images\Trypophobic19.tif	Holes	20.3102
2008	32	Images\snake43.tif	Threat	1.62081
2008	33	Images\spider29.tif	Threat	16.318
2008	34	Images\snake28.tif	Threat	6.36206
2008	35	Images\Trypophobic4.tif	Holes	-11.5944
2008	36	Images\Trypophobic11.tif	Holes	-1.51957
2008	37	Images\snake25.tif	Threat	-0.0866849
2008	38	Images\Trypophobic16.tif	Holes	-15.2632
2008	39	Images\snake22.tif	Threat	23.9054
2008	40	Images\spider21.tif	Threat	-15.8089
2008	41	Images\Trypophobic20.tif	Holes	-21.2907
2008	42	Images\spider8.tif	Threat	0.414149
2008	43	Images\spider24.tif	Threat	6.64871
2008	44	Images\Trypophobic18.tif	Holes	-3.22814
2008	45	Images\frog30.tif	Control	-6.09968
2008	46	Images\Trypophobic17.tif	Holes	-39.1628
2008	47	Images\butterfly19.tif	Control	25.8747
2008	48	Images\Trypophobic1.tif	Holes	-20.3479
2008	49	Images\Trypophobic6.tif	Holes	-7.65624
2008	50	Images\Object1.tif	Control	-18.87
2008	51	Images\spider22.tif	Threat	31.3128
2008	52	Images\frog28.tif	Control	8.73115
2008	53	Images\spider1.tif	Threat	4.93488
2008	54	Images\Trypophobic2.tif	Holes	16.8615
2008	55	Images\Trypophobic10.tif	Holes	17.9207
2008	56	Images\Object7.tif	Control	-14.2514
2008	57	Images\butterfly30.tif	Control	-4.91021
2008	58	Images\butterfly49.tif	Control	21.3378
2008	59	Images\Trypophobic14.tif	Holes	-28.8837
2008	60	Images\Trypophobic9.tif	Holes	-7.96693
2009	1	Images\Trypophobic4.tif	Holes	0.81045
2009	2	Images\Trypophobic7.tif	Holes	-9.56172
2009	3	Images\butterfly49.tif	Control	-4.83426
2009	4	Images\spider32.tif	Threat	-16.145
2009	5	Images\Object5.tif	Control	-0.419588
2009	6	Images\Trypophobic5.tif	Holes	-24.0738
2009	7	Images\snake4.tif	Threat	14.5338
2009	8	Images\snake40.tif	Threat	-10.9263
2009	9	Images\frog27.tif	Control	-10.5312
2009	10	Images\snake41.tif	Threat	-20.4258
2009	11	Images\frog28.tif	Control	-19.9885
2009	12	Images\Trypophobic18.tif	Holes	-14.5987
2009	13	Images\Trypophobic15.tif	Holes	-13.3428
2009	14	Images\Object10.tif	Control	-29.4358
2009	15	Images\Object4.tif	Control	-14.9494
2009	16	Images\Object1.tif	Control	0.240356
2009	17	Images\snake32.tif	Threat	-19.1075
2009	18	Images\Object8.tif	Control	-5.19565
2009	19	Images\Trypophobic13.tif	Holes	-29.2074
2009	20	Images\snake28.tif	Threat	-5.75527
2009	21	Images\spider22.tif	Threat	17.3492
2009	22	Images\frog24.tif	Control	-21.7281
2009	23	Images\Object6.tif	Control	4.68728
2009	24	Images\Trypophobic2.tif	Holes	8.60281
2009	25	Images\Object2.tif	Control	-39.1668
2009	26	Images\snake43.tif	Threat	11.0224
2009	27	Images\butterfly42.tif	Control	1.48526
2009	28	Images\butterfly9.tif	Control	-2.40154
2009	29	Images\butterfly19.tif	Control	-31.5857
2009	30	Images\Trypophobic19.tif	Holes	7.78221
2009	31	Images\snake25.tif	Threat	-1.82257
2009	32	Images\spider42.tif	Threat	-14.6
2009	33	Images\Object7.tif	Control	-4.02373
2009	34	Images\snake26.tif	Threat	-2.76372
2009	35	Images\spider55.tif	Threat	15.3334
2009	36	Images\Trypophobic3.tif	Holes	-23.82
2009	37	Images\Trypophobic16.tif	Holes	13.4063
2009	38	Images\frog30.tif	Control	5.38677
2009	39	Images\Object9.tif	Control	-17.8888
2009	40	Images\spider14.tif	Threat	-6.11834
2009	41	Images\Trypophobic12.tif	Holes	-6.31537
2009	42	Images\Object3.tif	Control	52.213
2009	43	Images\Trypophobic20.tif	Holes	49.1477
2009	44	Images\Trypophobic11.tif	Holes	6.12784
2009	45	Images\spider8.tif	Threat	-9.19215
2009	46	Images\snake57.tif	Threat	52.7865
2009	47	Images\Trypophobic6.tif	Holes	-25.092
2009	48	Images\spider1.tif	Threat	26.0295
2009	49	Images\Trypophobic14.tif	Holes	-4.37653
2009	50	Images\frog32.tif	Control	-15.1859
2009	51	Images\snake22.tif	Threat	-27.1733
2009	52	Images\Trypophobic8.tif	Holes	20.4059
2009	53	Images\Trypophobic9.tif	Holes	-26.9127
2009	54	Images\Trypophobic1.tif	Holes	9.30431
2009	55	Images\spider21.tif	Threat	-32.7361
2009	56	Images\spider29.tif	Threat	11.6614
2009	57	Images\spider24.tif	Threat	-2.39899
2009	58	Images\butterfly30.tif	Control	-19.4418
2009	59	Images\Trypophobic10.tif	Holes	-5.50918
2009	60	Images\Trypophobic17.tif	Holes	10.3951
2010	1	Images\spider24.tif	Threat
2010	2	Images\Trypophobic16.tif	Holes	-23.1585
2010	3	Images\frog30.tif	Control	-41.3537
2010	4	Images\snake43.tif	Threat	14.0376
2010	5	Images\frog28.tif	Control	-16.271
2010	6	Images\Object3.tif	Control	-34.5455
2010	7	Images\butterfly9.tif	Control	37.1521
2010	8	Images\butterfly42.tif	Control	-36.3701
2010	9	Images\Trypophobic4.tif	Holes	-11.5497
2010	10	Images\Trypophobic17.tif	Holes	-27.8007
2010	11	Images\butterfly19.tif	Control	-15.0464
2010	12	Images\Trypophobic19.tif	Holes	-17.2227
2010	13	Images\spider22.tif	Threat	19.3674
2010	14	Images\Object6.tif	Control	-36.1802
2010	15	Images\Object9.tif	Control	-31.7293
2010	16	Images\Trypophobic15.tif	Holes	-7.9811
2010	17	Images\Trypophobic12.tif	Holes	-19.1669
2010	18	Images\Trypophobic18.tif	Holes	-7.21837
2010	19	Images\Object5.tif	Control	-12.0129
2010	20	Images\Trypophobic2.tif	Holes	-16.6716
2010	21	Images\snake57.tif	Threat	-6.05098
2010	22	Images\snake32.tif	Threat	-36.3336
2010	23	Images\Object1.tif	Control	-37.3339
2010	24	Images\frog24.tif	Control	-19.3012
2010	25	Images\Trypophobic11.tif	Holes	-6.00303
2010	26	Images\snake40.tif	Threat	-22.0598
2010	27	Images\Object4.tif	Control	-3.25994
2010	28	Images\spider14.tif	Threat	-32.0757
2010	29	Images\Trypophobic5.tif	Holes	-19.2083
2010	30	Images\frog32.tif	Control	-12.5491
2010	31	Images\frog27.tif	Control	1.53558
2010	32	Images\spider1.tif	Threat	41.2398
2010	33	Images\Trypophobic10.tif	Holes	-22.7603
2010	34	Images\Trypophobic8.tif	Holes	-20.6851
2010	35	Images\Trypophobic7.tif	Holes	-20.15
2010	36	Images\snake28.tif	Threat	-38.6962
2010	37	Images\spider29.tif	Threat	7.97282
2010	38	Images\spider21.tif	Threat	-4.55935
2010	39	Images\Object10.tif	Control	2.23591
2010	40	Images\spider32.tif	Threat	-16.3542
2010	41	Images\Trypophobic9.tif	Holes	7.20135
2010	42	Images\Trypophobic13.tif	Holes	-34.3811
2010	43	Images\Object7.tif	Control	10.331
2010	44	Images\butterfly30.tif	Control	-20.0384
2010	45	Images\butterfly49.tif	Control	-2.24311
2010	46	Images\snake26.tif	Threat	-30.0943
2010	47	Images\Object2.tif	Control	16.889
2010	48	Images\snake25.tif	Threat	-25.381
2010	49	Images\spider42.tif	Threat	10.9271
2010	50	Images\spider8.tif	Threat	-12.5918
2010	51	Images\Object8.tif	Control	-4.1621
2010	52	Images\Trypophobic6.tif	Holes	-26.3112
2010	53	Images\Trypophobic20.tif	Holes	-27.0775
2010	54	Images\Trypophobic14.tif	Holes	-33.5503
2010	55	Images\snake4.tif	Threat	23.2714
2010	56	Images\Trypophobic1.tif	Holes	-34.7218
2010	57	Images\snake41.tif	Threat	-23.1797
2010	58	Images\Trypophobic3.tif	Holes	-1.75718
2010	59	Images\snake22.tif	Threat	2.29412
2010	60	Images\spider55.tif	Threat	43.1671
2011	1	Images\Object10.tif	Control	0.832258
2011	2	Images\frog32.tif	Control	-16.8991
2011	3	Images\snake57.tif	Threat	-11.5881
2011	4	Images\Object6.tif	Control	51.3131
2011	5	Images\Object4.tif	Control	28.8303
2011	6	Images\spider14.tif	Threat	-15.9092
2011	7	Images\Object2.tif	Control	-0.368305
2011	8	Images\spider55.tif	Threat	37.4478
2011	9	Images\Trypophobic17.tif	Holes	-25.1946
2011	10	Images\Trypophobic8.tif	Holes	-21.0819
2011	11	Images\butterfly49.tif	Control	-28.6116
2011	12	Images\frog30.tif	Control	-8.93839
2011	13	Images\Trypophobic16.tif	Holes	60.5147
2011	14	Images\snake40.tif	Threat	-29.557
2011	15	Images\Object1.tif	Control	-5.15176
2011	16	Images\Trypophobic3.tif	Holes	-30.1531
2011	17	Images\butterfly30.tif	Control	-21.8075
2011	18	Images\Object9.tif	Control	-11.9625
2011	19	Images\Object8.tif	Control	4.5923
2011	20	Images\Trypophobic19.tif	Holes	-11.6754
2011	21	Images\butterfly9.tif	Control	-19.7421
2011	22	Images\Trypophobic10.tif	Holes	-17.1606
2011	23	Images\frog24.tif	Control	-32.8344
2011	24	Images\snake32.tif	Threat	-4.72601
2011	25	Images\snake28.tif	Threat	-21.317
2011	26	Images\snake43.tif	Threat	-9.58519
2011	27	Images\Trypophobic2.tif	Holes	-17.569
2011	28	Images\Trypophobic12.tif	Holes	1.62291
2011	29	Images\spider1.tif	Threat	35.6304
2011	30	Images\Trypophobic13.tif	Holes	-40.2663
2011	31	Images\Object5.tif	Control	-5.3385
2011	32	Images\Trypophobic11.tif	Holes	11.234
2011	33	Images\butterfly42.tif	Control	-19.2663
2011	34	Images\Trypophobic9.tif	Holes	-14.8041
2011	35	Images\spider42.tif	Threat	23.2339
2011	36	Images\spider8.tif	Threat	3.6938
2011	37	Images\Trypophobic20.tif	Holes	-30.4835
2011	38	Images\snake22.tif	Threat	-26.333
2011	39	Images\spider32.tif	Threat	-12.7834
2011	40	Images\Object3.tif	Control	5.67869
2011	41	Images\Trypophobic5.tif	Holes	-10.4494
2011	42	Images\spider21.tif	Threat	7.51442
2011	43	Images\frog28.tif	Control	-48.4195
2011	44	Images\Trypophobic15.tif	Holes	-18.7637
2011	45	Images\Trypophobic14.tif	Holes	-38.5828
2011	46	Images\snake41.tif	Threat	-2.74161
2011	47	Images\Trypophobic1.tif	Holes	-5.00464
2011	48	Images\snake26.tif	Threat	21.8132
2011	49	Images\spider29.tif	Threat	-1.11489
2011	50	Images\snake25.tif	Threat	-24.6866
2011	51	Images\Trypophobic4.tif	Holes	-30.228
2011	52	Images\snake4.tif	Threat	-1.63425
2011	53	Images\frog27.tif	Control	-36.1157
2011	54	Images\Trypophobic6.tif	Holes
2011	55	Images\Object7.tif	Control	-31.2729
2011	56	Images\Trypophobic18.tif	Holes	-7.72141
2011	57	Images\butterfly19.tif	Control	38.5901
2011	58	Images\spider22.tif	Threat	-44.0914
2011	59	Images\Trypophobic7.tif	Holes	-11.2745
2011	60	Images\spider24.tif	Threat	13.7992
2012	1	Images\snake43.tif	Threat	-14.669
2012	2	Images\spider55.tif	Threat	20.4396
2012	3	Images\butterfly30.tif	Control	-10.6565
2012	4	Images\Object6.tif	Control	23.4333
2012	5	Images\Trypophobic14.tif	Holes	-27.531
2012	6	Images\snake25.tif	Threat	-16.3328
2012	7	Images\Trypophobic3.tif	Holes	-14.1525
2012	8	Images\Trypophobic4.tif	Holes	-13.8374
2012	9	Images\Trypophobic17.tif	Holes	-14.2168
2012	10	Images\spider1.tif	Threat	-13.9689
2012	11	Images\spider8.tif	Threat	8.86676
2012	12	Images\frog30.tif	Control	-25.4952
2012	13	Images\Object9.tif	Control	-13.0545
2012	14	Images\snake41.tif	Threat	-16.1538
2012	15	Images\Trypophobic1.tif	Holes	-9.47008
2012	16	Images\Trypophobic19.tif	Holes	-23.4996
2012	17	Images\Object8.tif	Control	-13.8838
2012	18	Images\Trypophobic12.tif	Holes	-18.2061
2012	19	Images\butterfly42.tif	Control	-0.616743
2012	20	Images\spider14.tif	Threat	-16.9246
2012	21	Images\Trypophobic11.tif	Holes	-1.4165
2012	22	Images\Trypophobic8.tif	Holes	17.8882
2012	23	Images\snake26.tif	Threat	-36.8845
2012	24	Images\butterfly49.tif	Control	-7.89715
2012	25	Images\frog24.tif	Control	-7.93017
2012	26	Images\Trypophobic13.tif	Holes	1.34147
2012	27	Images\Object5.tif	Control	-6.3758
2012	28	Images\Trypophobic20.tif	Holes	-18.317
2012	29	Images\frog28.tif	Control	16.1397
2012	30	Images\snake22.tif	Threat	-16.783
2012	31	Images\Trypophobic10.tif	Holes	9.48111
2012	32	Images\spider22.tif	Threat	10.5637
2012	33	Images\spider29.tif	Threat	-22.3378
2012	34	Images\snake32.tif	Threat	-12.2218
2012	35	Images\butterfly9.tif	Control	15.8043
2012	36	Images\Trypophobic2.tif	Holes	-20.4976
2012	37	Images\Object1.tif	Control	-6.11212
2012	38	Images\spider24.tif	Threat	2.28242
2012	39	Images\Trypophobic15.tif	Holes	-35.6336
2012	40	Images\Object2.tif	Control	45.7041
2012	41	Images\Trypophobic7.tif	Holes	-0.309923
2012	42	Images\spider42.tif	Threat	-20.597
2012	43	Images\spider32.tif	Threat	-14.101
2012	44	Images\Trypophobic6.tif	Holes	28.5776
2012	45	Images\snake4.tif	Threat	26.6086
2012	46	Images\Object4.tif	Control	-18.3415
2012	47	Images\frog32.tif	Control	-12.0247
2012	48	Images\Object10.tif	Control	-17.475
2012	49	Images\butterfly19.tif	Control	-36.7551
2012	50	Images\snake57.tif	Threat	21.5227
2012	51	Images\Trypophobic16.tif	Holes	16.828
2012	52	Images\Trypophobic5.tif	Holes	-19.3283
2012	53	Images\snake40.tif	Threat	-17.1403
2012	54	Images\Trypophobic18.tif	Holes	3.7236
2012	55	Images\Object3.tif	Control	-27.4482
2012	56	Images\frog27.tif	Control	3.82691
2012	57	Images\Object7.tif	Control	-12.823
2012	58	Images\Trypophobic9.tif	Holes	-32.591
2012	59	Images\spider21.tif	Threat	-31.5389
2012	60	Images\snake28.tif	Threat	49.4332
2013	1	Images\snake22.tif	Threat	2.21159
2013	2	Images\snake26.tif	Threat	-15.3766
2013	3	Images\Trypophobic18.tif	Holes	-23.0894
2013	4	Images\Object8.tif	Control	5.18133
2013	5	Images\butterfly30.tif	Control	-7.8666
2013	6	Images\snake28.tif	Threat	-25.8686
2013	7	Images\Trypophobic5.tif	Holes	-20.611
2013	8	Images\Trypophobic14.tif	Holes	-10.5498
2013	9	Images\spider21.tif	Threat	19.9064
2013	10	Images\Object7.tif	Control	-8.00973
2013	11	Images\butterfly9.tif	Control	9.16498
2013	12	Images\frog27.tif	Control	-8.93627
2013	13	Images\spider14.tif	Threat	6.15197
2013	14	Images\snake4.tif	Threat	7.92686
2013	15	Images\frog28.tif	Control	-10.6066
2013	16	Images\snake57.tif	Threat	-3.77426
2013	17	Images\Trypophobic4.tif	Holes	-22.6183
2013	18	Images\snake25.tif	Threat	-0.0247682
2013	19	Images\snake41.tif	Threat	-18.8699
2013	20	Images\spider32.tif	Threat	-3.9319
2013	21	Images\snake40.tif	Threat	13.9551
2013	22	Images\Trypophobic6.tif	Holes	-15.5202
2013	23	Images\Object5.tif	Control	-1.4586
2013	24	Images\Trypophobic13.tif	Holes	-25.5035
2013	25	Images\spider22.tif	Threat	2.74915
2013	26	Images\Trypophobic1.tif	Holes	-23.6696
2013	27	Images\butterfly49.tif	Control	32.2544
2013	28	Images\spider29.tif	Threat	12.9518
2013	29	Images\Trypophobic16.tif	Holes	14.75
2013	30	Images\spider24.tif	Threat	-1.09698
2013	31	Images\Trypophobic10.tif	Holes	1.53008
2013	32	Images\Trypophobic12.tif	Holes	7.04405
2013	33	Images\butterfly42.tif	Control	8.37006
2013	34	Images\spider1.tif	Threat	21.575
2013	35	Images\Trypophobic8.tif	Holes	-8.36046
2013	36	Images\Object6.tif	Control	10.2448
2013	37	Images\Object1.tif	Control	3.96553
2013	38	Images\snake43.tif	Threat	-23.6055
2013	39	Images\Trypophobic7.tif	Holes	0.14556
2013	40	Images\spider42.tif	Threat	-3.75621
2013	41	Images\butterfly19.tif	Control	-3.55563
2013	42	Images\Trypophobic11.tif	Holes	-6.18483
2013	43	Images\Object2.tif	Control	-4.16232
2013	44	Images\Trypophobic3.tif	Holes	10.2716
2013	45	Images\Trypophobic9.tif	Holes	5.9691
2013	46	Images\Object10.tif	Control	-0.825893
2013	47	Images\Trypophobic17.tif	Holes	-37.4481
2013	48	Images\spider55.tif	Threat	34.7657
2013	49	Images\frog24.tif	Control	-28.0117
2013	50	Images\Trypophobic20.tif	Holes	-27.4937
2013	51	Images\snake32.tif	Threat	-1.32825
2013	52	Images\Object3.tif	Control	15.2473
2013	53	Images\Trypophobic15.tif	Holes	-25.137
2013	54	Images\Object4.tif	Control	35.9946
2013	55	Images\spider8.tif	Threat	9.48979
2013	56	Images\Trypophobic19.tif	Holes	0.896216
2013	57	Images\Object9.tif	Control	-1.75835
2013	58	Images\frog32.tif	Control	-12.1388
2013	59	Images\frog30.tif	Control	9.30309
2013	60	Images\Trypophobic2.tif	Holes	20.8336
2014	1	Images\spider22.tif	Threat	8.00629
2014	2	Images\snake43.tif	Threat	-15.3723
2014	3	Images\Object4.tif	Control	-8.54567
2014	4	Images\Trypophobic17.tif	Holes	-21.0511
2014	5	Images\snake41.tif	Threat	-18.6383
2014	6	Images\snake40.tif	Threat	-28.8185
2014	7	Images\Trypophobic7.tif	Holes	-8.03882
2014	8	Images\Trypophobic11.tif	Holes	-26.6524
2014	9	Images\spider1.tif	Threat	-12.3042
2014	10	Images\frog28.tif	Control	-24.1295
2014	11	Images\spider8.tif	Threat	-0.232396
2014	12	Images\spider29.tif	Threat	14.3288
2014	13	Images\frog24.tif	Control	-49.4809
2014	14	Images\Trypophobic8.tif	Holes	-10.5575
2014	15	Images\spider55.tif	Threat	14.6893
2014	16	Images\Object9.tif	Control	-14.4825
2014	17	Images\Object3.tif	Control	-17.5665
2014	18	Images\Trypophobic6.tif	Holes	-15.6064
2014	19	Images\Trypophobic19.tif	Holes	-12.0329
2014	20	Images\Object1.tif	Control	-9.92514
2014	21	Images\Object5.tif	Control	-39.7629
2014	22	Images\butterfly49.tif	Control	-25.172
2014	23	Images\Trypophobic2.tif	Holes	-28.7633
2014	24	Images\Object7.tif	Control	-14.1332
2014	25	Images\Object6.tif	Control	4.95324
2014	26	Images\spider42.tif	Threat	-25.3293
2014	27	Images\snake26.tif	Threat	-51.5602
2014	28	Images\Trypophobic1.tif	Holes	-15.2233
2014	29	Images\frog27.tif	Control	14.958
2014	30	Images\Object10.tif	Control	-27.6423
2014	31	Images\Object2.tif	Control	-7.57673
2014	32	Images\snake57.tif	Threat	27.0119
2014	33	Images\Trypophobic18.tif	Holes	-20.02
2014	34	Images\snake28.tif	Threat	-22.4864
2014	35	Images\snake4.tif	Threat	-25.327
2014	36	Images\Trypophobic4.tif	Holes	9.58278
2014	37	Images\spider14.tif	Threat	64.5202
2014	38	Images\Trypophobic16.tif	Holes	24.9935
2014	39	Images\butterfly19.tif	Control	-37.6155
2014	40	Images\butterfly42.tif	Control	13.8031
2014	41	Images\butterfly30.tif	Control	24.8478
2014	42	Images\snake22.tif	Threat	1.96292
2014	43	Images\butterfly9.tif	Control	-14.4387
2014	44	Images\Trypophobic13.tif	Holes	-53.5097
2014	45	Images\snake32.tif	Threat	-12.5752
2014	46	Images\Trypophobic12.tif	Holes	-23.7745
2014	47	Images\spider24.tif	Threat	32.5475
2014	48	Images\spider21.tif	Threat	10.4875
2014	49	Images\Object8.tif	Control	-55.731
2014	50	Images\Trypophobic15.tif	Holes	-17.0178
2014	51	Images\Trypophobic20.tif	Holes	-31.4122
2014	52	Images\snake25.tif	Threat	8.00109
2014	53	Images\Trypophobic10.tif	Holes	-22.0599
2014	54	Images\frog30.tif	Control	-14.0721
2014	55	Images\Trypophobic14.tif	Holes	-46.2387
2014	56	Images\Trypophobic3.tif	Holes	-32.397
2014	57	Images\Trypophobic9.tif	Holes	-17.2914
2014	58	Images\Trypophobic5.tif	Holes	-64.8747
2014	59	Images\frog32.tif	Control	-31.1566
2014	60	Images\spider32.tif	Threat	-2.55909
2015	1	Images\Trypophobic19.tif	Holes	3.98624
2015	2	Images\snake57.tif	Threat	-9.0765
2015	3	Images\Trypophobic9.tif	Holes	-7.7689
2015	4	Images\Trypophobic14.tif	Holes	-4.10028
2015	5	Images\spider29.tif	Threat	-4.13537
2015	6	Images\Trypophobic3.tif	Holes	11.0519
2015	7	Images\butterfly9.tif	Control	10.3536
2015	8	Images\Trypophobic8.tif	Holes	-2.42994
2015	9	Images\Trypophobic5.tif	Holes	-6.14641
2015	10	Images\Object2.tif	Control	12.8731
2015	11	Images\snake32.tif	Threat	12.0724
2015	12	Images\snake41.tif	Threat	-7.89218
2015	13	Images\snake43.tif	Threat	-0.334418
2015	14	Images\spider32.tif	Threat	0.824035
2015	15	Images\butterfly42.tif	Control	-8.09579
2015	16	Images\Object8.tif	Control	-9.77331
2015	17	Images\Trypophobic12.tif	Holes	6.98096
2015	18	Images\snake26.tif	Threat	-8.76021
2015	19	Images\Trypophobic4.tif	Holes	-6.36033
2015	20	Images\spider55.tif	Threat	25.9252
2015	21	Images\Trypophobic13.tif	Holes	15.1823
2015	22	Images\spider21.tif	Threat	-4.90558
2015	23	Images\spider8.tif	Threat	-1.92125
2015	24	Images\Object1.tif	Control	-5.42994
2015	25	Images\frog24.tif	Control	-13.47
2015	26	Images\frog32.tif	Control	-7.08257
2015	27	Images\spider14.tif	Threat	19.6002
2015	28	Images\Object9.tif	Control	-11.4645
2015	29	Images\Object5.tif	Control	-6.00295
2015	30	Images\Trypophobic7.tif	Holes	-7.47974
2015	31	Images\Trypophobic17.tif	Holes	-12.3039
2015	32	Images\Object7.tif	Control	-6.98911
2015	33	Images\Object3.tif	Control	10.9826
2015	34	Images\frog28.tif	Control	-9.10116
2015	35	Images\snake4.tif	Threat	-6.99812
2015	36	Images\Object4.tif	Control	-3.73421
2015	37	Images\Trypophobic20.tif	Holes	-9.41773
2015	38	Images\Trypophobic6.tif	Holes	-3.5134
2015	39	Images\Trypophobic18.tif	Holes	10.6282
2015	40	Images\Trypophobic1.tif	Holes	-3.70212
2015	41	Images\frog27.tif	Control	10.7677
2015	42	Images\spider1.tif	Threat	5.69687
2015	43	Images\frog30.tif	Control	-13.2765
2015	44	Images\Trypophobic10.tif	Holes	9.30111
2015	45	Images\snake25.tif	Threat	-0.969007
2015	46	Images\Object10.tif	Control	-17.086
2015	47	Images\Trypophobic16.tif	Holes	5.7847
2015	48	Images\spider22.tif	Threat	3.05429
2015	49	Images\snake28.tif	Threat	-9.66355
2015	50	Images\butterfly30.tif	Control	-11.0735
2015	51	Images\Trypophobic2.tif	Holes	5.84949
2015	52	Images\spider24.tif	Threat	10.4528
2015	53	Images\spider42.tif	Threat	-8.13722
2015	54	Images\Object6.tif	Control	0.784586
2015	55	Images\snake22.tif	Threat	-18.4676
2015	56	Images\Trypophobic15.tif	Holes	-10.346
2015	57	Images\snake40.tif	Threat	-11.7482
2015	58	Images\Trypophobic11.tif	Holes	2.69515
2015	59	Images\butterfly19.tif	Control	-5.94962
2015	60	Images\butterfly49.tif	Control	-5.45185
2016	1	Images\Trypophobic19.tif	Holes	-12.8465
2016	2	Images\snake25.tif	Threat	-12.8323
2016	3	Images\snake43.tif	Threat	-25.3576
2016	4	Images\spider29.tif	Threat	20.0477
2016	5	Images\snake57.tif	Threat	-2.30529
2016	6	Images\Trypophobic5.tif	Holes	-20.6963
2016	7	Images\snake32.tif	Threat	-14.8055
2016	8	Images\butterfly49.tif	Control	-11.8085
2016	9	Images\spider22.tif	Threat	3.85709
2016	10	Images\Trypophobic11.tif	Holes	-14.2288
2016	11	Images\snake26.tif	Threat	-24.8503
2016	12	Images\snake28.tif	Threat	-12.4266
2016	13	Images\butterfly30.tif	Control	-3.54403
2016	14	Images\snake40.tif	Threat	-40.554
2016	15	Images\Object3.tif	Control	-4.18577
2016	16	Images\Trypophobic1.tif	Holes	-14.6106
2016	17	Images\spider32.tif	Threat	-7.77708
2016	18	Images\spider1.tif	Threat	3.65194
2016	19	Images\Trypophobic17.tif	Holes	-33.515
2016	20	Images\snake41.tif	Threat	-18.1018
2016	21	Images\Object5.tif	Control	-1.80437
2016	22	Images\butterfly42.tif	Control	-27.5223
2016	23	Images\spider24.tif	Threat	2.81861
2016	24	Images\Trypophobic6.tif	Holes	-46.3225
2016	25	Images\frog28.tif	Control	-3.44951
2016	26	Images\Trypophobic20.tif	Holes	-17.5791
2016	27	Images\Object8.tif	Control	-11.1946
2016	28	Images\spider55.tif	Threat	5.98906
2016	29	Images\Trypophobic15.tif	Holes	-32.2943
2016	30	Images\Trypophobic10.tif	Holes	7.49649
2016	31	Images\frog32.tif	Control	-20.6831
2016	32	Images\Object6.tif	Control	-8.10677
2016	33	Images\Trypophobic12.tif	Holes	-12.0258
2016	34	Images\butterfly9.tif	Control	-3.06945
2016	35	Images\frog27.tif	Control	-3.24028
2016	36	Images\Trypophobic4.tif	Holes	-21.2505
2016	37	Images\Object2.tif	Control	13.4104
2016	38	Images\Trypophobic13.tif	Holes	-17.1891
2016	39	Images\Object7.tif	Control	-26.1437
2016	40	Images\frog30.tif	Control	-13.7323
2016	41	Images\Trypophobic18.tif	Holes	-12.8846
2016	42	Images\Trypophobic8.tif	Holes	11.9974
2016	43	Images\Object4.tif	Control	-5.07179
2016	44	Images\spider21.tif	Threat	-26.6401
2016	45	Images\Trypophobic9.tif	Holes	-16.9404
2016	46	Images\snake4.tif	Threat	-9.6867
2016	47	Images\Trypophobic3.tif	Holes	-14.5468
2016	48	Images\spider14.tif	Threat	5.52315
2016	49	Images\frog24.tif	Control	2.83733
2016	50	Images\Object10.tif	Control	8.01232
2016	51	Images\Object1.tif	Control	-26.6709
2016	52	Images\Trypophobic16.tif	Holes	-5.37648
2016	53	Images\Object9.tif	Control	-37.7612
2016	54	Images\snake22.tif	Threat	-24.4376
2016	55	Images\spider8.tif	Threat	-18.509
2016	56	Images\spider42.tif	Threat	-15.0239
2016	57	Images\Trypophobic7.tif	Holes	-7.45256
2016	58	Images\Trypophobic2.tif	Holes	-33.0967
2016	59	Images\Trypophobic14.tif	Holes	-23.3418
2016	60	Images\butterfly19.tif	Control	-19.3844
2017	1	Images\Trypophobic13.tif	Holes	-4.68366
2017	2	Images\snake28.tif	Threat	-1.18447
2017	3	Images\butterfly49.tif	Control	-8.72506
2017	4	Images\Trypophobic12.tif	Holes	2.44213
2017	5	Images\snake32.tif	Threat	5.25107
2017	6	Images\Object10.tif	Control	13.9436
2017	7	Images\spider24.tif	Threat	23.66
2017	8	Images\Trypophobic10.tif	Holes	13.2037
2017	9	Images\Object2.tif	Control	10.7636
2017	10	Images\butterfly42.tif	Control	2.2574
2017	11	Images\spider42.tif	Threat	-13.0812
2017	12	Images\Trypophobic5.tif	Holes	-17.5605
2017	13	Images\Trypophobic17.tif	Holes	2.79111
2017	14	Images\spider29.tif	Threat	6.1904
2017	15	Images\Object3.tif	Control	18.2994
2017	16	Images\butterfly30.tif	Control	9.22096
2017	17	Images\frog28.tif	Control	-4.64571
2017	18	Images\Trypophobic11.tif	Holes	15.6799
2017	19	Images\Trypophobic4.tif	Holes	-0.65985
2017	20	Images\Object9.tif	Control	-5.59499
2017	21	Images\Object1.tif	Control	-16.7278
2017	22	Images\Trypophobic19.tif	Holes	19.1219
2017	23	Images\Trypophobic20.tif	Holes	-16.6573
2017	24	Images\spider22.tif	Threat	25.986
2017	25	Images\snake26.tif	Threat	-16.0803
2017	26	Images\Trypophobic14.tif	Holes	-0.639021
2017	27	Images\Trypophobic18.tif	Holes	21.3306
2017	28	Images\Trypophobic16.tif	Holes	-20.2539
2017	29	Images\spider8.tif	Threat	11.8777
2017	30	Images\Trypophobic2.tif	Holes	0.636828
2017	31	Images\Object8.tif	Control	23.8258
2017	32	Images\Trypophobic7.tif	Holes	-1.08984
2017	33	Images\Trypophobic3.tif	Holes	-11.0786
2017	34	Images\spider14.tif	Threat	20.7096
2017	35	Images\frog24.tif	Control	-7.53407
2017	36	Images\Object6.tif	Control	11.8506
2017	37	Images\spider21.tif	Threat	-1.38136
2017	38	Images\Trypophobic1.tif	Holes	4.24249
2017	39	Images\frog27.tif	Control	18.9404
2017	40	Images\snake57.tif	Threat	1.01692
2017	41	Images\Trypophobic6.tif	Holes	-26.7574
2017	42	Images\spider32.tif	Threat	21.333
2017	43	Images\snake22.tif	Threat	-9.43955
2017	44	Images\snake25.tif	Threat	4.81754
2017	45	Images\snake43.tif	Threat	-4.7296
2017	46	Images\Object5.tif	Control	3.71349
2017	47	Images\spider55.tif	Threat	38.0373
2017	48	Images\snake4.tif	Threat	4.65825
2017	49	Images\snake41.tif	Threat	7.58151
2017	50	Images\Trypophobic15.tif	Holes	-16.9488
2017	51	Images\butterfly9.tif	Control	10.8746
2017	52	Images\snake40.tif	Threat	4.31163
2017	53	Images\spider1.tif	Threat	8.89686
2017	54	Images\Trypophobic9.tif	Holes	10.541
2017	55	Images\Object7.tif	Control	-11.6666
2017	56	Images\Trypophobic8.tif	Holes	31.1822
2017	57	Images\frog30.tif	Control	-19.5063
2017	58	Images\frog32.tif	Control	6.62896
2017	59	Images\Object4.tif	Control	5.09005
2017	60	Images\butterfly19.tif	Control	-2.91868
2018	1	Images\snake4.tif	Threat	-15.8463
2018	2	Images\spider32.tif	Threat	-14.4366
2018	3	Images\Trypophobic13.tif	Holes	-7.53447
2018	4	Images\Trypophobic2.tif	Holes	-19.8774
2018	5	Images\spider14.tif	Threat	6.89428
2018	6	Images\snake28.tif	Threat	-9.02543
2018	7	Images\Trypophobic12.tif	Holes	-25.6374
2018	8	Images\Trypophobic10.tif	Holes	16.6198
2018	9	Images\Trypophobic15.tif	Holes	-28.6494
2018	10	Images\Trypophobic1.tif	Holes	-4.01018
2018	11	Images\butterfly9.tif	Control	-14.3017
2018	12	Images\frog28.tif	Control	-6.05534
2018	13	Images\spider21.tif	Threat	-2.05179
2018	14	Images\butterfly30.tif	Control	-6.55652
2018	15	Images\Trypophobic9.tif	Holes	-12.2519
2018	16	Images\Trypophobic20.tif	Holes	-10.3971
2018	17	Images\Trypophobic19.tif	Holes	-10.6279
2018	18	Images\snake43.tif	Threat	-5.88346
2018	19	Images\Trypophobic11.tif	Holes	-11.4388
2018	20	Images\spider8.tif	Threat	14.2662
2018	21	Images\Trypophobic8.tif	Holes	-11.5686
2018	22	Images\frog32.tif	Control	-38.894
2018	23	Images\Trypophobic6.tif	Holes	-19.9226
2018	24	Images\Object5.tif	Control	9.10545
2018	25	Images\Object6.tif	Control	19.1378
2018	26	Images\Trypophobic7.tif	Holes	-14.8646
2018	27	Images\snake40.tif	Threat	-5.27296
2018	28	Images\spider42.tif	Threat	-15.1951
2018	29	Images\snake26.tif	Threat	1.50058
2018	30	Images\Trypophobic17.tif	Holes	-14.2179
2018	31	Images\frog24.tif	Control	-33.7954
2018	32	Images\spider22.tif	Threat	40.5104
2018	33	Images\snake41.tif	Threat	-36.8388
2018	34	Images\spider55.tif	Threat	23.9034
2018	35	Images\Trypophobic18.tif	Holes	-10.3489
2018	36	Images\butterfly42.tif	Control	-1.43077
2018	37	Images\spider29.tif	Threat	3.05947
2018	38	Images\Object1.tif	Control	-17.8814
2018	39	Images\spider24.tif	Threat	26.3694
2018	40	Images\frog27.tif	Control	11.9078
2018	41	Images\Trypophobic14.tif	Holes	-6.35479
2018	42	Images\Object9.tif	Control	-11.3386
2018	43	Images\Object8.tif	Control	-14.8267
2018	44	Images\Object2.tif	Control	18.2814
2018	45	Images\Object4.tif	Control	-6.23782
2018	46	Images\snake22.tif	Threat	-8.14397
2018	47	Images\snake32.tif	Threat	-21.521
2018	48	Images\snake25.tif	Threat	-26.1857
2018	49	Images\Trypophobic16.tif	Holes	-0.30743
2018	50	Images\Object10.tif	Control	-22.3591
2018	51	Images\frog30.tif	Control	-19.8545
2018	52	Images\Trypophobic4.tif	Holes	-10.7752
2018	53	Images\butterfly49.tif	Control	-4.09106
2018	54	Images\snake57.tif	Threat	-13.6008
2018	55	Images\Object7.tif	Control	-33.854
2018	56	Images\Trypophobic3.tif	Holes	-16.2858
2018	57	Images\Object3.tif	Control	30.3243
2018	58	Images\spider1.tif	Threat	37.8402
2018	59	Images\butterfly19.tif	Control	-6.09177
2018	60	Images\Trypophobic5.tif	Holes	-24.5144
2019	1	Images\butterfly9.tif	Control	-8.68767
2019	2	Images\spider14.tif	Threat	-2.95467
2019	3	Images\snake32.tif	Threat	-21.327
2019	4	Images\snake26.tif	Threat	2.0101
2019	5	Images\snake25.tif	Threat	2.97061
2019	6	Images\Trypophobic10.tif	Holes	0.663206
2019	7	Images\frog32.tif	Control	-31.4058
2019	8	Images\Trypophobic6.tif	Holes	-21.2626
2019	9	Images\Trypophobic19.tif	Holes	4.14876
2019	10	Images\spider22.tif	Threat	37.6375
2019	11	Images\Trypophobic11.tif	Holes	-13.6684
2019	12	Images\Object7.tif	Control	-14.3538
2019	13	Images\spider24.tif	Threat	8.54951
2019	14	Images\snake22.tif	Threat	-19.9264
2019	15	Images\Trypophobic16.tif	Holes	18.3848
2019	16	Images\snake28.tif	Threat	-17.5822
2019	17	Images\Trypophobic13.tif	Holes	-12.9728
2019	18	Images\Object4.tif	Control	-3.67705
2019	19	Images\Trypophobic18.tif	Holes	4.07761
2019	20	Images\Object5.tif	Control	8.62351
2019	21	Images\snake4.tif	Threat	18.6914
2019	22	Images\Trypophobic20.tif	Holes	1.88808
2019	23	Images\Object9.tif	Control	6.53724
2019	24	Images\butterfly30.tif	Control	28.8397
2019	25	Images\snake40.tif	Threat	-24.0728
2019	26	Images\frog27.tif	Control	16.912
2019	27	Images\Trypophobic1.tif	Holes	-7.66852
2019	28	Images\Trypophobic7.tif	Holes	3.16064
2019	29	Images\snake57.tif	Threat	-8.2562
2019	30	Images\butterfly49.tif	Control	38.3278
2019	31	Images\frog24.tif	Control	-21.5123
2019	32	Images\Trypophobic12.tif	Holes	-31.5044
2019	33	Images\Trypophobic15.tif	Holes	-21.2797
2019	34	Images\Trypophobic5.tif	Holes	4.53493
2019	35	Images\spider42.tif	Threat	-18.5424
2019	36	Images\butterfly42.tif	Control	-23.4878
2019	37	Images\Object8.tif	Control	-1.12193
2019	38	Images\Trypophobic4.tif	Holes	-29.6769
2019	39	Images\Trypophobic3.tif	Holes	13.3769
2019	40	Images\spider29.tif	Threat	-11.6084
2019	41	Images\Trypophobic14.tif	Holes	-30.5963
2019	42	Images\Object1.tif	Control	-3.46537
2019	43	Images\Object10.tif	Control	-12.2968
2019	44	Images\Trypophobic8.tif	Holes	-22.7421
2019	45	Images\frog30.tif	Control	-12.4747
2019	46	Images\snake41.tif	Threat	13.0387
2019	47	Images\spider1.tif	Threat	4.05163
2019	48	Images\spider21.tif	Threat	-23.0337
2019	49	Images\Object3.tif	Control	33.1297
2019	50	Images\Trypophobic9.tif	Holes	-19.1571
2019	51	Images\Trypophobic17.tif	Holes	-31.1923
2019	52	Images\spider55.tif	Threat	65.2572
2019	53	Images\frog28.tif	Control	-10.437
2019	54	Images\Object2.tif	Control	-3.69583
2019	55	Images\Trypophobic2.tif	Holes	3.3381
2019	56	Images\snake43.tif	Threat	-2.67832
2019	57	Images\spider8.tif	Threat	-25.7814
2019	58	Images\Object6.tif	Control	3.86569
2019	59	Images\butterfly19.tif	Control	-12.09
2019	60	Images\spider32.tif	Threat	-0.440569
2020	1	Images\Trypophobic13.tif	Holes	-43.3789
2020	2	Images\Trypophobic8.tif	Holes	11.4823
2020	3	Images\snake57.tif	Threat	3.2435
2020	4	Images\Trypophobic14.tif	Holes	-17.9954
2020	5	Images\Object7.tif	Control	-8.34788
2020	6	Images\spider42.tif	Threat	-13.937
2020	7	Images\Trypophobic6.tif	Holes	-29.503
2020	8	Images\snake28.tif	Threat	7.70312
2020	9	Images\spider22.tif	Threat	20.915
2020	10	Images\spider24.tif	Threat	13.7643
2020	11	Images\Object3.tif	Control	21.514
2020	12	Images\spider29.tif	Threat	5.93287
2020	13	Images\butterfly9.tif	Control	-0.255972
2020	14	Images\snake26.tif	Threat	0.709794
2020	15	Images\Trypophobic7.tif	Holes	-22.8077
2020	16	Images\snake41.tif	Threat	-24.5563
2020	17	Images\butterfly30.tif	Control	-20.7165
2020	18	Images\Trypophobic5.tif	Holes	-24.2799
2020	19	Images\snake25.tif	Threat	13.2048
2020	20	Images\Trypophobic16.tif	Holes	6.38507
2020	21	Images\Trypophobic17.tif	Holes	2.98479
2020	22	Images\snake32.tif	Threat	-31.8722
2020	23	Images\butterfly49.tif	Control	3.58555
2020	24	Images\frog30.tif	Control	-31.0935
2020	25	Images\snake22.tif	Threat	9.6177
2020	26	Images\Trypophobic2.tif	Holes	27.6037
2020	27	Images\frog27.tif	Control	-8.37263
2020	28	Images\frog32.tif	Control	1.67776
2020	29	Images\Trypophobic4.tif	Holes	-15.5137
2020	30	Images\Trypophobic1.tif	Holes	-8.68049
2020	31	Images\Trypophobic11.tif	Holes	-15.4948
2020	32	Images\spider14.tif	Threat	1.17508
2020	33	Images\spider1.tif	Threat	22.2925
2020	34	Images\Object8.tif	Control	-11.102
2020	35	Images\spider32.tif	Threat	8.60059
2020	36	Images\Trypophobic9.tif	Holes	7.69823
2020	37	Images\Trypophobic10.tif	Holes	-5.5214
2020	38	Images\Object6.tif	Control	19.8336
2020	39	Images\Object2.tif	Control	-4.42118
2020	40	Images\Object10.tif	Control	-9.16066
2020	41	Images\snake4.tif	Threat	-8.4679
2020	42	Images\Trypophobic3.tif	Holes	-28.1819
2020	43	Images\spider55.tif	Threat	38.1106
2020	44	Images\Object1.tif	Control	4.16198
2020	45	Images\Object9.tif	Control	-11.7427
2020	46	Images\Trypophobic20.tif	Holes	-28.4259
2020	47	Images\Object5.tif	Control	6.39204
2020	48	Images\snake43.tif	Threat	-27.8261
2020	49	Images\spider21.tif	Threat	-11.3857
2020	50	Images\spider8.tif	Threat	0.953544
2020	51	Images\frog24.tif	Control	-44.4934
2020	52	Images\snake40.tif	Threat	9.07919
2020	53	Images\frog28.tif	Control	17.4696
2020	54	Images\Object4.tif	Control	-3.7896
2020	55	Images\butterfly42.tif	Control	19.0306
2020	56	Images\Trypophobic12.tif	Holes	-1.61392
2020	57	Images\Trypophobic19.tif	Holes	-2.79649
2020	58	Images\Trypophobic18.tif	Holes	-19.6378
2020	59	Images\butterfly19.tif	Control	10.4174
2020	60	Images\Trypophobic15.tif	Holes	-32.909
2026	1	Images\Trypophobic6.tif	Holes	-31.8223
2026	2	Images\snake25.tif	Threat	-3.96172
2026	3	Images\snake4.tif	Threat	19.338
2026	4	Images\Trypophobic17.tif	Holes	-12.3824
2026	5	Images\spider14.tif	Threat	-0.473882
2026	6	Images\spider8.tif	Threat	-7.07419
2026	7	Images\Trypophobic10.tif	Holes	-7.87178
2026	8	Images\Trypophobic16.tif	Holes	13.4924
2026	9	Images\spider21.tif	Threat	-9.6106
2026	10	Images\frog27.tif	Control	4.24567
2026	11	Images\Object2.tif	Control	-1.80366
2026	12	Images\butterfly30.tif	Control	8.60365
2026	13	Images\Trypophobic19.tif	Holes	1.05157
2026	14	Images\snake28.tif	Threat	-6.11272
2026	15	Images\Trypophobic20.tif	Holes	-6.68969
2026	16	Images\snake43.tif	Threat	1.94212
2026	17	Images\frog30.tif	Control	14.9973
2026	18	Images\Trypophobic7.tif	Holes	-11.2279
2026	19	Images\snake26.tif	Threat	37.768
2026	20	Images\snake22.tif	Threat	-25.273
2026	21	Images\Trypophobic3.tif	Holes	8.92882
2026	22	Images\Object5.tif	Control	4.72488
2026	23	Images\butterfly9.tif	Control	11.7746
2026	24	Images\Trypophobic14.tif	Holes	-7.01769
2026	25	Images\Trypophobic11.tif	Holes	20.3462
2026	26	Images\frog28.tif	Control	39.9346
2026	27	Images\spider32.tif	Threat	0.31498
2026	28	Images\spider55.tif	Threat	1.78218
2026	29	Images\Trypophobic1.tif	Holes	36.5218
2026	30	Images\Object3.tif	Control	9.14376
2026	31	Images\spider29.tif	Threat	6.09864
2026	32	Images\snake40.tif	Threat	-24.9793
2026	33	Images\frog24.tif	Control	-6.73093
2026	34	Images\butterfly42.tif	Control	28.2071
2026	35	Images\Object10.tif	Control	17.2979
2026	36	Images\Trypophobic9.tif	Holes	-19.337
2026	37	Images\Object8.tif	Control	-5.61294
2026	38	Images\Object6.tif	Control	-13.586
2026	39	Images\snake32.tif	Threat	17.2588
2026	40	Images\Object9.tif	Control	43.895
2026	41	Images\snake41.tif	Threat	7.32332
2026	42	Images\Object7.tif	Control	48.6906
2026	43	Images\Object4.tif	Control	25.4923
2026	44	Images\spider1.tif	Threat	1.67321
2026	45	Images\Trypophobic5.tif	Holes	-21.67
2026	46	Images\frog32.tif	Control	8.26575
2026	47	Images\Trypophobic13.tif	Holes	-22.6309
2026	48	Images\Trypophobic12.tif	Holes	-4.04831
2026	49	Images\spider42.tif	Threat	7.61608
2026	50	Images\Trypophobic18.tif	Holes	29.2556
2026	51	Images\Object1.tif	Control	-11.326
2026	52	Images\Trypophobic4.tif	Holes	21.5685
2026	53	Images\Trypophobic15.tif	Holes	-1.37366
2026	54	Images\snake57.tif	Threat	9.74224
2026	55	Images\Trypophobic8.tif	Holes	32.6482
2026	56	Images\butterfly49.tif	Control	11.9613
2026	57	Images\butterfly19.tif	Control	26.1223
2026	58	Images\Trypophobic2.tif	Holes	-27.0278
2026	59	Images\spider22.tif	Threat	3.05027
2026	60	Images\spider24.tif	Threat	-8.00467
2027	1	Images\spider8.tif	Threat	4.63026
2027	2	Images\frog27.tif	Control	4.94103
2027	3	Images\Trypophobic1.tif	Holes	-3.54003
2027	4	Images\Object3.tif	Control	2.75541
2027	5	Images\Trypophobic3.tif	Holes	-12.9144
2027	6	Images\Object5.tif	Control	2.85799
2027	7	Images\Trypophobic20.tif	Holes	-12.6216
2027	8	Images\Trypophobic4.tif	Holes	9.66499
2027	9	Images\Object2.tif	Control	22.2869
2027	10	Images\spider29.tif	Threat	-19.3591
2027	11	Images\snake25.tif	Threat	-18.197
2027	12	Images\snake32.tif	Threat	36.7632
2027	13	Images\butterfly42.tif	Control	6.53756
2027	14	Images\snake40.tif	Threat	-1.30502
2027	15	Images\spider24.tif	Threat	15.9805
2027	16	Images\frog30.tif	Control	-2.70518
2027	17	Images\spider1.tif	Threat	55.6427
2027	18	Images\Object4.tif	Control	-24.021
2027	19	Images\snake28.tif	Threat	-13.5058
2027	20	Images\Trypophobic16.tif	Holes	51.1289
2027	21	Images\Trypophobic2.tif	Holes	-12.1594
2027	22	Images\Trypophobic6.tif	Holes	3.78295
2027	23	Images\Object9.tif	Control	19.0859
2027	24	Images\Trypophobic10.tif	Holes	12.1608
2027	25	Images\spider14.tif	Threat	-16.7414
2027	26	Images\Trypophobic19.tif	Holes	26.2956
2027	27	Images\butterfly30.tif	Control	10.059
2027	28	Images\frog32.tif	Control	-24.1863
2027	29	Images\Trypophobic7.tif	Holes	1.19874
2027	30	Images\Trypophobic14.tif	Holes	-11.372
2027	31	Images\Trypophobic8.tif	Holes
2027	32	Images\Object7.tif	Control
2027	33	Images\snake41.tif	Threat
2027	34	Images\snake57.tif	Threat
2027	35	Images\Object6.tif	Control
2027	36	Images\Object8.tif	Control
2027	37	Images\spider22.tif	Threat
2027	38	Images\snake22.tif	Threat
2027	39	Images\frog24.tif	Control
2027	40	Images\frog28.tif	Control
2027	41	Images\spider42.tif	Threat
2027	42	Images\Trypophobic13.tif	Holes
2027	43	Images\Trypophobic17.tif	Holes
2027	44	Images\Object1.tif	Control
2027	45	Images\snake4.tif	Threat
2027	46	Images\Trypophobic12.tif	Holes
2027	47	Images\spider32.tif	Threat
2027	48	Images\Trypophobic5.tif	Holes
2027	49	Images\Object10.tif	Control
2027	50	Images\butterfly19.tif	Control
2027	51	Images\spider55.tif	Threat
2027	52	Images\Trypophobic11.tif	Holes
2027	53	Images\snake43.tif	Threat
2027	54	Images\spider21.tif	Threat
2027	55	Images\Trypophobic18.tif	Holes
2027	56	Images\butterfly49.tif	Control	-1.6479
2027	57	Images\Trypophobic15.tif	Holes
2027	58	Images\butterfly9.tif	Control
2027	59	Images\snake26.tif	Threat
2027	60	Images\Trypophobic9.tif	Holes
2029	1	Images\Object1.tif	Control	4.68582
2029	2	Images\Trypophobic10.tif	Holes	-3.4041
2029	3	Images\snake22.tif	Threat	-6.93416
2029	4	Images\Object2.tif	Control	7.63597
2029	5	Images\Trypophobic5.tif	Holes	-12.5161
2029	6	Images\Trypophobic15.tif	Holes	-8.25856
2029	7	Images\Trypophobic4.tif	Holes	-12.914
2029	8	Images\snake43.tif	Threat	-11.4612
2029	9	Images\spider1.tif	Threat	22.7646
2029	10	Images\Trypophobic12.tif	Holes	4.4001
2029	11	Images\Trypophobic16.tif	Holes	16.0479
2029	12	Images\Object9.tif	Control	-5.8536
2029	13	Images\Trypophobic17.tif	Holes	6.42752
2029	14	Images\spider32.tif	Threat	-24.9852
2029	15	Images\butterfly9.tif	Control	-17.1809
2029	16	Images\Object10.tif	Control	3.61524
2029	17	Images\Trypophobic19.tif	Holes	12.2029
2029	18	Images\snake41.tif	Threat	-7.02386
2029	19	Images\snake57.tif	Threat	30.329
2029	20	Images\Object3.tif	Control	12.3563
2029	21	Images\spider22.tif	Threat	26.175
2029	22	Images\snake32.tif	Threat	-20.2105
2029	23	Images\frog27.tif	Control	-0.997583
2029	24	Images\Trypophobic7.tif	Holes	36.1716
2029	25	Images\Object8.tif	Control	34.5995
2029	26	Images\snake28.tif	Threat	-22.6242
2029	27	Images\Trypophobic13.tif	Holes	23.1669
2029	28	Images\Trypophobic1.tif	Holes	-18.6519
2029	29	Images\Object6.tif	Control	6.25437
2029	30	Images\spider24.tif	Threat	17.4125
2029	31	Images\Trypophobic11.tif	Holes	4.74112
2029	32	Images\spider29.tif	Threat	-5.7541
2029	33	Images\spider14.tif	Threat	1.03513
2029	34	Images\snake25.tif	Threat	3.62828
2029	35	Images\snake4.tif	Threat	22.0194
2029	36	Images\Trypophobic20.tif	Holes	-28.4102
2029	37	Images\spider55.tif	Threat	-12.2289
2029	38	Images\Trypophobic6.tif	Holes	-21.9727
2029	39	Images\spider42.tif	Threat	19.0165
2029	40	Images\Trypophobic2.tif	Holes	2.88534
2029	41	Images\frog28.tif	Control	-3.97285
2029	42	Images\frog32.tif	Control	-11.126
2029	43	Images\Object5.tif	Control	-9.77838
2029	44	Images\butterfly30.tif	Control	-12.6613
2029	45	Images\butterfly19.tif	Control	28.2354
2029	46	Images\frog24.tif	Control	-19.549
2029	47	Images\Trypophobic14.tif	Holes	16.3903
2029	48	Images\spider21.tif	Threat	40.1762
2029	49	Images\snake40.tif	Threat	4.98564
2029	50	Images\snake26.tif	Threat	7.19867
2029	51	Images\Trypophobic8.tif	Holes	-33.8627
2029	52	Images\Object7.tif	Control	-6.02128
2029	53	Images\butterfly42.tif	Control	-5.02637
2029	54	Images\Trypophobic3.tif	Holes	-25.4595
2029	55	Images\Trypophobic18.tif	Holes	36.3281
2029	56	Images\butterfly49.tif	Control	-26.6748
2029	57	Images\frog30.tif	Control	33.112
2029	58	Images\spider8.tif	Threat	-1.83355
2029	59	Images\Trypophobic9.tif	Holes	-8.05053
2029	60	Images\Object4.tif	Control	67.4756
2030	1	Images\frog28.tif	Control	-8.96874
2030	2	Images\Trypophobic4.tif	Holes	-8.94522
2030	3	Images\spider22.tif	Threat	16.45
2030	4	Images\Trypophobic9.tif	Holes	-1.27748
2030	5	Images\Object8.tif	Control	-3.6842
2030	6	Images\snake26.tif	Threat	-12.1092
2030	7	Images\snake25.tif	Threat	-11.4137
2030	8	Images\snake28.tif	Threat	12.6115
2030	9	Images\butterfly9.tif	Control	-7.52847
2030	10	Images\spider21.tif	Threat	-19.4023
2030	11	Images\spider55.tif	Threat	-3.10305
2030	12	Images\Object4.tif	Control	-6.47525
2030	13	Images\spider14.tif	Threat	-5.38656
2030	14	Images\snake32.tif	Threat	-12.0434
2030	15	Images\Trypophobic14.tif	Holes	-7.98089
2030	16	Images\spider32.tif	Threat	-16.2992
2030	17	Images\snake43.tif	Threat	-6.14884
2030	18	Images\Trypophobic17.tif	Holes	-10.8999
2030	19	Images\snake4.tif	Threat	1.09382
2030	20	Images\Trypophobic3.tif	Holes	-12.5527
2030	21	Images\Trypophobic10.tif	Holes	-5.68999
2030	22	Images\frog30.tif	Control	-12.1361
2030	23	Images\Trypophobic2.tif	Holes	-2.32138
2030	24	Images\Trypophobic6.tif	Holes	-13.3921
2030	25	Images\frog32.tif	Control	-19.8352
2030	26	Images\frog27.tif	Control	-2.85271
2030	27	Images\butterfly19.tif	Control	-9.29791
2030	28	Images\butterfly49.tif	Control	10.1971
2030	29	Images\snake22.tif	Threat	-17.9342
2030	30	Images\Trypophobic13.tif	Holes	0.253805
2030	31	Images\spider8.tif	Threat	-7.35186
2030	32	Images\Object1.tif	Control	-6.55706
2030	33	Images\Trypophobic15.tif	Holes	-4.55968
2030	34	Images\Trypophobic16.tif	Holes	-0.242787
2030	35	Images\Object9.tif	Control	13.892
2030	36	Images\Trypophobic11.tif	Holes	-1.24691
2030	37	Images\Object6.tif	Control	4.38467
2030	38	Images\frog24.tif	Control	-0.260976
2030	39	Images\Trypophobic12.tif	Holes	-8.13628
2030	40	Images\spider24.tif	Threat	-1.02451
2030	41	Images\Trypophobic7.tif	Holes	11.2249
2030	42	Images\snake40.tif	Threat	-1.87615
2030	43	Images\Object7.tif	Control	-2.92062
2030	44	Images\snake57.tif	Threat	-14.8293
2030	45	Images\Trypophobic18.tif	Holes	-2.25352
2030	46	Images\butterfly42.tif	Control	-12.9449
2030	47	Images\snake41.tif	Threat	-3.75848
2030	48	Images\Object5.tif	Control	5.16458
2030	49	Images\Trypophobic5.tif	Holes	-22.1656
2030	50	Images\Object3.tif	Control	0.708599
2030	51	Images\Object2.tif	Control	1.37974
2030	52	Images\Trypophobic1.tif	Holes	-13.6111
2030	53	Images\spider42.tif	Threat	-11.7058
2030	54	Images\spider1.tif	Threat	-1.75481
2030	55	Images\Object10.tif	Control	-2.52461
2030	56	Images\butterfly30.tif	Control	-2.9099
2030	57	Images\spider29.tif	Threat	-2.73585
2030	58	Images\Trypophobic8.tif	Holes	5.1302
2030	59	Images\Trypophobic20.tif	Holes	-0.116302
2030	60	Images\Trypophobic19.tif	Holes	-8.02073
2031	1	Images\Trypophobic10.tif	Holes	10.5579
2031	2	Images\Trypophobic5.tif	Holes	-21.1982
2031	3	Images\Object4.tif	Control	21.5221
2031	4	Images\spider8.tif	Threat	-8.24966
2031	5	Images\butterfly42.tif	Control	1.59698
2031	6	Images\snake32.tif	Threat	-38.5034
2031	7	Images\Trypophobic6.tif	Holes	-16.0138
2031	8	Images\frog32.tif	Control	7.7638
2031	9	Images\frog24.tif	Control	-6.88338
2031	10	Images\Trypophobic14.tif	Holes	-43.2536
2031	11	Images\spider32.tif	Threat	-25.5029
2031	12	Images\frog30.tif	Control	11.6085
2031	13	Images\snake26.tif	Threat	3.02558
2031	14	Images\spider14.tif	Threat	-40.1895
2031	15	Images\Trypophobic3.tif	Holes	-26.0407
2031	16	Images\Trypophobic4.tif	Holes	-8.27449
2031	17	Images\Object7.tif	Control	-32.8497
2031	18	Images\frog27.tif	Control	14.0849
2031	19	Images\Object6.tif	Control	-18.9501
2031	20	Images\spider55.tif	Threat	50.0198
2031	21	Images\Object9.tif	Control	-38.1822
2031	22	Images\Object1.tif	Control	-15.4562
2031	23	Images\spider29.tif	Threat	12.4281
2031	24	Images\frog28.tif	Control	28.7519
2031	25	Images\Trypophobic11.tif	Holes
2031	26	Images\Object10.tif	Control	1.66456
2031	27	Images\spider22.tif	Threat	-9.41587
2031	28	Images\butterfly9.tif	Control	-1.14743
2031	29	Images\Trypophobic16.tif	Holes	12.1102
2031	30	Images\Trypophobic20.tif	Holes	-14.9587
2031	31	Images\butterfly30.tif	Control
2031	32	Images\spider21.tif	Threat
2031	33	Images\butterfly49.tif	Control
2031	34	Images\snake28.tif	Threat
2031	35	Images\Trypophobic8.tif	Holes
2031	36	Images\snake41.tif	Threat
2031	37	Images\Trypophobic18.tif	Holes
2031	38	Images\Trypophobic13.tif	Holes
2031	39	Images\snake43.tif	Threat
2031	40	Images\Trypophobic2.tif	Holes	-90.8753
2031	41	Images\Object2.tif	Control
2031	42	Images\Object3.tif	Control
2031	43	Images\Trypophobic19.tif	Holes
2031	44	Images\Trypophobic17.tif	Holes
2031	45	Images\Trypophobic15.tif	Holes	-73.6321
2031	46	Images\snake22.tif	Threat
2031	47	Images\spider42.tif	Threat
2031	48	Images\Object5.tif	Control
2031	49	Images\snake40.tif	Threat	46.3754
2031	50	Images\snake57.tif	Threat	19.1446
2031	51	Images\Trypophobic12.tif	Holes	-98.921
2031	52	Images\Trypophobic1.tif	Holes
2031	53	Images\spider24.tif	Threat	-70.1805
2031	54	Images\snake25.tif	Threat	-20.9638
2031	55	Images\butterfly19.tif	Control	-6.74043
2031	56	Images\spider1.tif	Threat
2031	57	Images\Trypophobic9.tif	Holes
2031	58	Images\snake4.tif	Threat
2031	59	Images\Object8.tif	Control
2031	60	Images\Trypophobic7.tif	Holes	13.3752
2032	1	Images\snake41.tif	Threat	19.8048
2032	2	Images\spider42.tif	Threat	-13.2339
2032	3	Images\Object4.tif	Control	0.0539838
2032	4	Images\spider21.tif	Threat	8.68708
2032	5	Images\Trypophobic19.tif	Holes	8.50618
2032	6	Images\Object6.tif	Control	10.0552
2032	7	Images\Object3.tif	Control	1.07329
2032	8	Images\frog32.tif	Control	8.53399
2032	9	Images\Trypophobic10.tif	Holes	3.46795
2032	10	Images\Trypophobic5.tif	Holes	15.6804
2032	11	Images\Trypophobic17.tif	Holes	-30.4559
2032	12	Images\Trypophobic2.tif	Holes	15.8356
2032	13	Images\Object9.tif	Control	30.1231
2032	14	Images\Trypophobic9.tif	Holes	-3.27434
2032	15	Images\Trypophobic4.tif	Holes	15.0306
2032	16	Images\Trypophobic1.tif	Holes	4.41554
2032	17	Images\snake4.tif	Threat	31.8639
2032	18	Images\spider8.tif	Threat	10.6876
2032	19	Images\snake57.tif	Threat	13.8355
2032	20	Images\spider22.tif	Threat	25.8609
2032	21	Images\frog24.tif	Control	-10.7836
2032	22	Images\butterfly49.tif	Control	-2.18643
2032	23	Images\Object7.tif	Control	5.17255
2032	24	Images\snake28.tif	Threat	48.854
2032	25	Images\Trypophobic13.tif	Holes	-9.95227
2032	26	Images\Trypophobic20.tif	Holes	0.148236
2032	27	Images\frog30.tif	Control	-11.2284
2032	28	Images\Trypophobic15.tif	Holes	-10.5448
2032	29	Images\snake25.tif	Threat	9.03365
2032	30	Images\frog28.tif	Control	23.0784
2032	31	Images\snake43.tif	Threat	14.0461
2032	32	Images\snake40.tif	Threat
2032	33	Images\frog27.tif	Control	9.57036
2032	34	Images\butterfly9.tif	Control	1.2403
2032	35	Images\spider29.tif	Threat	35.7251
2032	36	Images\Object1.tif	Control	-16.8547
2032	37	Images\Trypophobic12.tif	Holes	-2.45672
2032	38	Images\butterfly19.tif	Control	0.467547
2032	39	Images\snake22.tif	Threat	16.0849
2032	40	Images\Trypophobic6.tif	Holes	-5.93357
2032	41	Images\Trypophobic8.tif	Holes	-14.0878
2032	42	Images\Object2.tif	Control	10.6127
2032	43	Images\spider14.tif	Threat	42.4704
2032	44	Images\spider1.tif	Threat	24.019
2032	45	Images\Object10.tif	Control	9.42098
2032	46	Images\Trypophobic11.tif	Holes	17.8199
2032	47	Images\spider24.tif	Threat	21.185
2032	48	Images\Trypophobic16.tif	Holes	-2.52141
2032	49	Images\spider55.tif	Threat	19.4498
2032	50	Images\Trypophobic14.tif	Holes	-15.4946
2032	51	Images\Trypophobic3.tif	Holes	6.15518
2032	52	Images\butterfly42.tif	Control	-5.7704
2032	53	Images\Trypophobic7.tif	Holes	14.2443
2032	54	Images\spider32.tif	Threat	5.89332
2032	55	Images\snake26.tif	Threat	10.8933
2032	56	Images\snake32.tif	Threat	2.33979
2032	57	Images\Object5.tif	Control	24.3668
2032	58	Images\butterfly30.tif	Control	-6.78855
2032	59	Images\Object8.tif	Control	9.5908
2032	60	Images\Trypophobic18.tif	Holes	-1.13037
2033	1	Images\spider24.tif	Threat	6.18298
2033	2	Images\frog30.tif	Control	-0.0455658
2033	3	Images\Object3.tif	Control	4.56233
2033	4	Images\butterfly42.tif	Control	3.90496
2033	5	Images\Trypophobic9.tif	Holes	5.86475
2033	6	Images\Trypophobic3.tif	Holes	-0.821105
2033	7	Images\frog27.tif	Control	-11.7967
2033	8	Images\Object1.tif	Control	-13.7435
2033	9	Images\spider1.tif	Threat	5.10775
2033	10	Images\Trypophobic18.tif	Holes	2.21396
2033	11	Images\frog28.tif	Control	-4.71539
2033	12	Images\Trypophobic2.tif	Holes	7.31841
2033	13	Images\snake43.tif	Threat	-13.2464
2033	14	Images\frog32.tif	Control	-2.25237
2033	15	Images\Trypophobic13.tif	Holes	-13.8208
2033	16	Images\spider21.tif	Threat	-16.6165
2033	17	Images\butterfly9.tif	Control	2.2267
2033	18	Images\spider42.tif	Threat	-21.6868
2033	19	Images\spider8.tif	Threat	-4.64927
2033	20	Images\Trypophobic5.tif	Holes	-19.146
2033	21	Images\Object8.tif	Control	-13.1544
2033	22	Images\Trypophobic14.tif	Holes	-18.8093
2033	23	Images\Trypophobic20.tif	Holes	-19.14
2033	24	Images\Object6.tif	Control	-9.95272
2033	25	Images\Trypophobic16.tif	Holes	12.061
2033	26	Images\Trypophobic15.tif	Holes	-24.8478
2033	27	Images\Object9.tif	Control	20.3771
2033	28	Images\Object7.tif	Control	-17.854
2033	29	Images\snake4.tif	Threat	-14.696
2033	30	Images\snake26.tif	Threat	-10.2033
2033	31	Images\Object10.tif	Control	-9.70429
2033	32	Images\Trypophobic1.tif	Holes	13.1383
2033	33	Images\Trypophobic8.tif	Holes	-15.8298
2033	34	Images\spider32.tif	Threat	-8.70452
2033	35	Images\snake41.tif	Threat	-16.2756
2033	36	Images\snake32.tif	Threat	-16.281
2033	37	Images\Trypophobic19.tif	Holes	-16.1488
2033	38	Images\spider22.tif	Threat	-2.09175
2033	39	Images\snake25.tif	Threat	4.76736
2033	40	Images\snake40.tif	Threat	-19.7798
2033	41	Images\Trypophobic10.tif	Holes	2.17154
2033	42	Images\Trypophobic12.tif	Holes	13.6395
2033	43	Images\Object2.tif	Control	6.88057
2033	44	Images\Object5.tif	Control	7.54544
2033	45	Images\Object4.tif	Control	-9.58527
2033	46	Images\snake28.tif	Threat	-18.8591
2033	47	Images\Trypophobic11.tif	Holes	48.4982
2033	48	Images\snake22.tif	Threat	-2.41578
2033	49	Images\Trypophobic7.tif	Holes	-9.35108
2033	50	Images\snake57.tif	Threat	-3.88383
2033	51	Images\butterfly49.tif	Control	-1.41842
2033	52	Images\butterfly30.tif	Control	8.99371
2033	53	Images\frog24.tif	Control	-19.1125
2033	54	Images\spider14.tif	Threat	8.6002
2033	55	Images\Trypophobic17.tif	Holes	-8.76274
2033	56	Images\spider55.tif	Threat	4.40212
2033	57	Images\Trypophobic4.tif	Holes	-8.2022
2033	58	Images\Trypophobic6.tif	Holes	2.8311
2033	59	Images\spider29.tif	Threat	-12.3748
2033	60	Images\butterfly19.tif	Control	-15.7162
2034	1	Images\Trypophobic3.tif	Holes	-6.8441
2034	2	Images\Object5.tif	Control	-3.10952
2034	3	Images\spider1.tif	Threat	-12.7024
2034	4	Images\snake22.tif	Threat	-14.1704
2034	5	Images\Trypophobic11.tif	Holes	-8.71099
2034	6	Images\Trypophobic19.tif	Holes	4.02794
2034	7	Images\frog24.tif	Control	-32.9496
2034	8	Images\snake28.tif	Threat	29.2771
2034	9	Images\Object7.tif	Control	-15.183
2034	10	Images\snake25.tif	Threat	-31.0305
2034	11	Images\Trypophobic17.tif	Holes	-34.5982
2034	12	Images\Object6.tif	Control	9.84441
2034	13	Images\butterfly19.tif	Control	-22.3974
2034	14	Images\spider55.tif	Threat	36.2529
2034	15	Images\butterfly9.tif	Control	-8.94832
2034	16	Images\Trypophobic7.tif	Holes	-18.0933
2034	17	Images\frog28.tif	Control	-14.216
2034	18	Images\Object2.tif	Control	0.277364
2034	19	Images\Trypophobic16.tif	Holes	-8.03499
2034	20	Images\Object10.tif	Control	10.8438
2034	21	Images\Object4.tif	Control	-0.717124
2034	22	Images\Object8.tif	Control	-31.5018
2034	23	Images\spider8.tif	Threat	7.65884
2034	24	Images\Trypophobic9.tif	Holes	-11.3905
2034	25	Images\frog32.tif	Control	-18.5148
2034	26	Images\Object1.tif	Control	-15.7335
2034	27	Images\spider22.tif	Threat	50.9699
2034	28	Images\Trypophobic6.tif	Holes	-4.15438
2034	29	Images\butterfly42.tif	Control	-3.08407
2034	30	Images\frog30.tif	Control	-20.5268
2034	31	Images\Object9.tif	Control	-22.3689
2034	32	Images\Trypophobic1.tif	Holes	10.3692
2034	33	Images\Trypophobic15.tif	Holes	6.95232
2034	34	Images\butterfly49.tif	Control	-9.44872
2034	35	Images\Trypophobic14.tif	Holes	2.48136
2034	36	Images\Trypophobic5.tif	Holes	-3.78088
2034	37	Images\snake32.tif	Threat	-9.77876
2034	38	Images\frog27.tif	Control	67.4522
2034	39	Images\Trypophobic2.tif	Holes	-35.2399
2034	40	Images\spider32.tif	Threat	-2.15679
2034	41	Images\Trypophobic10.tif	Holes	-22.0812
2034	42	Images\spider29.tif	Threat	-30.4513
2034	43	Images\spider42.tif	Threat	11.8664
2034	44	Images\snake57.tif	Threat	5.11364
2034	45	Images\Trypophobic20.tif	Holes	-32.3054
2034	46	Images\Trypophobic18.tif	Holes	5.80523
2034	47	Images\Trypophobic4.tif	Holes	-4.99975
2034	48	Images\snake41.tif	Threat	-17.3864
2034	49	Images\snake40.tif	Threat	-20.253
2034	50	Images\Trypophobic12.tif	Holes	-2.90854
2034	51	Images\spider14.tif	Threat	23.8131
2034	52	Images\snake43.tif	Threat	-16.0596
2034	53	Images\snake26.tif	Threat	-10.2314
2034	54	Images\spider24.tif	Threat	-12.7012
2034	55	Images\Object3.tif	Control	1.30818
2034	56	Images\Trypophobic13.tif	Holes	-10.7927
2034	57	Images\spider21.tif	Threat	28.0409
2034	58	Images\Trypophobic8.tif	Holes	-9.83789
2034	59	Images\butterfly30.tif	Control	-20.5812
2034	60	Images\snake4.tif	Threat	6.48355
2035	1	Images\Trypophobic7.tif	Holes	4.60027
2035	2	Images\Trypophobic1.tif	Holes	-15.662
2035	3	Images\snake26.tif	Threat	-18.7931
2035	4	Images\Object10.tif	Control	-10.6536
2035	5	Images\Trypophobic11.tif	Holes	-8.72221
2035	6	Images\Object2.tif	Control	6.32857
2035	7	Images\Trypophobic10.tif	Holes	-19.9184
2035	8	Images\Trypophobic13.tif	Holes	-13.4058
2035	9	Images\snake41.tif	Threat	-9.61658
2035	10	Images\spider21.tif	Threat	-9.90645
2035	11	Images\snake57.tif	Threat	-4.5018
2035	12	Images\butterfly9.tif	Control	-14.8696
2035	13	Images\butterfly30.tif	Control	-9.18244
2035	14	Images\spider22.tif	Threat	14.8891
2035	15	Images\snake40.tif	Threat	-29.7768
2035	16	Images\Object6.tif	Control	-7.82496
2035	17	Images\Trypophobic19.tif	Holes	-19.683
2035	18	Images\Object1.tif	Control	-9.73498
2035	19	Images\Object7.tif	Control	-17.7572
2035	20	Images\Object9.tif	Control	-3.50986
2035	21	Images\Object5.tif	Control	7.27851
2035	22	Images\spider14.tif	Threat	-23.9298
2035	23	Images\Object3.tif	Control	15.5172
2035	24	Images\spider24.tif	Threat	-19.4982
2035	25	Images\snake4.tif	Threat	-29.8638
2035	26	Images\spider29.tif	Threat	-22.4417
2035	27	Images\spider8.tif	Threat	-2.72815
2035	28	Images\butterfly19.tif	Control	-25.8147
2035	29	Images\Object4.tif	Control	5.98757
2035	30	Images\Trypophobic14.tif	Holes	-29.2799
2035	31	Images\Trypophobic17.tif	Holes	-13.5216
2035	32	Images\Trypophobic2.tif	Holes	-10.3704
2035	33	Images\Trypophobic9.tif	Holes	-5.30589
2035	34	Images\frog32.tif	Control	-22.2837
2035	35	Images\snake28.tif	Threat	-5.24943
2035	36	Images\butterfly49.tif	Control	-15.4428
2035	37	Images\butterfly42.tif	Control	-10.1102
2035	38	Images\Trypophobic8.tif	Holes	9.48704
2035	39	Images\Object8.tif	Control	-20.8076
2035	40	Images\frog28.tif	Control	-23.114
2035	41	Images\Trypophobic20.tif	Holes	-13.0941
2035	42	Images\frog27.tif	Control	-13.4216
2035	43	Images\spider32.tif	Threat	-20.9341
2035	44	Images\snake43.tif	Threat	-24.238
2035	45	Images\Trypophobic6.tif	Holes	-9.05848
2035	46	Images\spider1.tif	Threat	-10.8067
2035	47	Images\frog24.tif	Control	-28.8706
2035	48	Images\spider55.tif	Threat	21.1822
2035	49	Images\Trypophobic3.tif	Holes	-21.2547
2035	50	Images\snake22.tif	Threat	-10.8909
2035	51	Images\frog30.tif	Control	-30.529
2035	52	Images\Trypophobic15.tif	Holes	-22.9326
2035	53	Images\snake25.tif	Threat	-18.2283
2035	54	Images\Trypophobic18.tif	Holes	-15.1068
2035	55	Images\Trypophobic16.tif	Holes	-5.8626
2035	56	Images\Trypophobic5.tif	Holes	-25.9849
2035	57	Images\spider42.tif	Threat	-19.686
2035	58	Images\snake32.tif	Threat	-24.8754
2035	59	Images\Trypophobic4.tif	Holes	-24.361
2035	60	Images\Trypophobic12.tif	Holes	-9.90129
2036	1	Images\Object5.tif	Control	-7.40231
2036	2	Images\Trypophobic7.tif	Holes	-6.3902
2036	3	Images\butterfly9.tif	Control	11.7086
2036	4	Images\spider14.tif	Threat	-2.09861
2036	5	Images\snake41.tif	Threat	10.0275
2036	6	Images\spider32.tif	Threat	-3.8465
2036	7	Images\spider1.tif	Threat	8.19008
2036	8	Images\Object4.tif	Control	17.2755
2036	9	Images\Object10.tif	Control	5.99571
2036	10	Images\Trypophobic2.tif	Holes	0.704147
2036	11	Images\frog30.tif	Control	2.10596
2036	12	Images\frog24.tif	Control	-6.63717
2036	13	Images\Trypophobic6.tif	Holes	-22.4378
2036	14	Images\snake4.tif	Threat	5.36
2036	15	Images\Trypophobic1.tif	Holes	9.48343
2036	16	Images\Trypophobic12.tif	Holes	-13.272
2036	17	Images\Trypophobic10.tif	Holes	-10.153
2036	18	Images\Trypophobic18.tif	Holes	-30.9288
2036	19	Images\butterfly30.tif	Control	30.6571
2036	20	Images\spider42.tif	Threat	-2.85442
2036	21	Images\Trypophobic17.tif	Holes	-25.7426
2036	22	Images\snake26.tif	Threat	-25.4056
2036	23	Images\butterfly19.tif	Control	-35.9152
2036	24	Images\Trypophobic13.tif	Holes	-17.671
2036	25	Images\snake43.tif	Threat	-2.22808
2036	26	Images\Object3.tif	Control	-8.90829
2036	27	Images\Trypophobic8.tif	Holes	-10.5011
2036	28	Images\Object9.tif	Control	16.0813
2036	29	Images\snake32.tif	Threat	2.94943
2036	30	Images\Object8.tif	Control	-19.002
2036	31	Images\Trypophobic5.tif	Holes	-6.02022
2036	32	Images\frog27.tif	Control	-2.64269
2036	33	Images\spider55.tif	Threat	-6.01016
2036	34	Images\Trypophobic11.tif	Holes	-20.8651
2036	35	Images\butterfly42.tif	Control	-2.46996
2036	36	Images\Trypophobic3.tif	Holes	-15.8935
2036	37	Images\snake57.tif	Threat	-4.17892
2036	38	Images\Trypophobic20.tif	Holes	-5.46152
2036	39	Images\Object7.tif	Control	-16.1317
2036	40	Images\snake28.tif	Threat	-18.3196
2036	41	Images\Trypophobic15.tif	Holes	11.5559
2036	42	Images\Trypophobic9.tif	Holes	2.01973
2036	43	Images\spider24.tif	Threat	30.2872
2036	44	Images\snake40.tif	Threat	12.4687
2036	45	Images\frog28.tif	Control	-12.6772
2036	46	Images\snake22.tif	Threat	-13.8201
2036	47	Images\Trypophobic16.tif	Holes	-7.01992
2036	48	Images\butterfly49.tif	Control	-7.21668
2036	49	Images\Trypophobic4.tif	Holes	17.6872
2036	50	Images\Trypophobic19.tif	Holes	15.1725
2036	51	Images\spider21.tif	Threat	-6.95565
2036	52	Images\Trypophobic14.tif	Holes	-30.4639
2036	53	Images\spider29.tif	Threat	24.8234
2036	54	Images\spider22.tif	Threat	57.0023
2036	55	Images\spider8.tif	Threat	-1.40871
2036	56	Images\Object6.tif	Control	3.18798
2036	57	Images\snake25.tif	Threat	1.34874
2036	58	Images\Object2.tif	Control	-16.3254
2036	59	Images\Object1.tif	Control	-2.08216
2036	60	Images\frog32.tif	Control	37.6177
2037	1	Images\spider14.tif	Threat	10.0385
2037	2	Images\Trypophobic6.tif	Holes	-14.5566
2037	3	Images\Trypophobic18.tif	Holes	3.87561
2037	4	Images\frog32.tif	Control	-12.2863
2037	5	Images\Trypophobic5.tif	Holes	3.06386
2037	6	Images\Object2.tif	Control	17.2074
2037	7	Images\Trypophobic1.tif	Holes	-1.17232
2037	8	Images\Trypophobic20.tif	Holes	2.04645
2037	9	Images\Object1.tif	Control	-2.7344
2037	10	Images\snake43.tif	Threat	4.04294
2037	11	Images\spider21.tif	Threat	9.89052
2037	12	Images\Trypophobic11.tif	Holes	-7.84917
2037	13	Images\spider24.tif	Threat	15.7009
2037	14	Images\Trypophobic8.tif	Holes	-6.42412
2037	15	Images\Trypophobic2.tif	Holes	-6.93505
2037	16	Images\Trypophobic4.tif	Holes	6.91063
2037	17	Images\Object3.tif	Control	18.1945
2037	18	Images\Object10.tif	Control	-12.4994
2037	19	Images\frog28.tif	Control	14.9455
2037	20	Images\frog30.tif	Control	-11.4207
2037	21	Images\Trypophobic10.tif	Holes	10.5596
2037	22	Images\snake22.tif	Threat	7.21993
2037	23	Images\snake32.tif	Threat	-2.38932
2037	24	Images\Trypophobic14.tif	Holes	10.5769
2037	25	Images\Trypophobic16.tif	Holes	1.92838
2037	26	Images\spider29.tif	Threat	-11.0105
2037	27	Images\Object4.tif	Control	-7.69232
2037	28	Images\snake41.tif	Threat	-5.22059
2037	29	Images\Trypophobic9.tif	Holes	12.2068
2037	30	Images\Trypophobic15.tif	Holes	-15.3811
2037	31	Images\Trypophobic13.tif	Holes	10.1911
2037	32	Images\spider22.tif	Threat	23.21
2037	33	Images\butterfly42.tif	Control	19.7453
2037	34	Images\Object8.tif	Control	-29.8447
2037	35	Images\spider42.tif	Threat	-10.1619
2037	36	Images\snake40.tif	Threat	-24.3497
2037	37	Images\spider55.tif	Threat	25.4651
2037	38	Images\snake25.tif	Threat	-0.926841
2037	39	Images\spider8.tif	Threat	-1.06314
2037	40	Images\frog24.tif	Control	-5.6221
2037	41	Images\butterfly19.tif	Control	-4.1838
2037	42	Images\spider32.tif	Threat	0.321791
2037	43	Images\butterfly9.tif	Control	-14.4179
2037	44	Images\frog27.tif	Control	6.28658
2037	45	Images\butterfly49.tif	Control	0.599511
2037	46	Images\Object5.tif	Control	-14.3151
2037	47	Images\snake28.tif	Threat	36.9726
2037	48	Images\Object7.tif	Control	-6.0263
2037	49	Images\snake4.tif	Threat	8.66901
2037	50	Images\Trypophobic7.tif	Holes	1.09726
2037	51	Images\Object9.tif	Control	-6.23141
2037	52	Images\butterfly30.tif	Control	10.6229
2037	53	Images\Trypophobic17.tif	Holes	-34.0615
2037	54	Images\Object6.tif	Control	13.9007
2037	55	Images\Trypophobic19.tif	Holes	-0.716378
2037	56	Images\snake57.tif	Threat	6.20756
2037	57	Images\spider1.tif	Threat	21.6107
2037	58	Images\Trypophobic3.tif	Holes	0.586932
2037	59	Images\snake26.tif	Threat	-15.9879
2037	60	Images\Trypophobic12.tif	Holes	-27.1266
2038	1	Images\Trypophobic10.tif	Holes	-6.09366
2038	2	Images\Trypophobic12.tif	Holes	-10.3596
2038	3	Images\spider1.tif	Threat	25.1368
2038	4	Images\Trypophobic4.tif	Holes	-29.6955
2038	5	Images\Object3.tif	Control	21.0641
2038	6	Images\Object6.tif	Control	-9.65393
2038	7	Images\Trypophobic20.tif	Holes	-5.73312
2038	8	Images\Trypophobic13.tif	Holes	20.6828
2038	9	Images\butterfly49.tif	Control	12.6253
2038	10	Images\spider22.tif	Threat	38.3743
2038	11	Images\Trypophobic2.tif	Holes	-16.2776
2038	12	Images\Object1.tif	Control	3.81605
2038	13	Images\snake41.tif	Threat	12.7023
2038	14	Images\Trypophobic1.tif	Holes	0.478749
2038	15	Images\Trypophobic17.tif	Holes	2.60488
2038	16	Images\Object2.tif	Control	18.2625
2038	17	Images\Trypophobic9.tif	Holes	2.56277
2038	18	Images\snake32.tif	Threat	-43.5189
2038	19	Images\Trypophobic15.tif	Holes	-34.167
2038	20	Images\snake57.tif	Threat	19.3732
2038	21	Images\butterfly42.tif	Control	13.5634
2038	22	Images\Trypophobic14.tif	Holes	-12.4625
2038	23	Images\spider24.tif	Threat	14.2049
2038	24	Images\Object4.tif	Control	-41.8199
2038	25	Images\butterfly19.tif	Control	6.70905
2038	26	Images\Trypophobic18.tif	Holes	-25.6754
2038	27	Images\snake4.tif	Threat	-7.02046
2038	28	Images\frog28.tif	Control	-27.0124
2038	29	Images\spider32.tif	Threat	-10.1194
2038	30	Images\snake25.tif	Threat	15.9611
2038	31	Images\Trypophobic5.tif	Holes	-42.2589
2038	32	Images\frog27.tif	Control	-29.9755
2038	33	Images\frog32.tif	Control	-5.23646
2038	34	Images\Trypophobic7.tif	Holes	-25.524
2038	35	Images\spider29.tif	Threat	51.9546
2038	36	Images\spider42.tif	Threat	-14.0754
2038	37	Images\Object7.tif	Control	-31.5524
2038	38	Images\frog24.tif	Control	-3.04061
2038	39	Images\Object9.tif	Control	-36.3186
2038	40	Images\snake43.tif	Threat	-29.7395
2038	41	Images\spider21.tif	Threat	-1.64318
2038	42	Images\snake28.tif	Threat	-36.2718
2038	43	Images\Object10.tif	Control	-17.4448
2038	44	Images\Trypophobic8.tif	Holes	10.3582
2038	45	Images\Trypophobic6.tif	Holes	10.9949
2038	46	Images\Trypophobic11.tif	Holes	-46.5268
2038	47	Images\butterfly9.tif	Control	16.9791
2038	48	Images\snake22.tif	Threat	32.3239
2038	49	Images\spider14.tif	Threat	-39.2933
2038	50	Images\Trypophobic3.tif	Holes	-18.3872
2038	51	Images\Trypophobic16.tif	Holes	17.1534
2038	52	Images\spider55.tif	Threat	-7.61108
2038	53	Images\Object5.tif	Control	16.5146
2038	54	Images\snake26.tif	Threat	-15.5758
2038	55	Images\Object8.tif	Control	-37.716
2038	56	Images\spider8.tif	Threat	0.67326
2038	57	Images\frog30.tif	Control	-13.3781
2038	58	Images\butterfly30.tif	Control	-28.2098
2038	59	Images\Trypophobic19.tif	Holes	-1.19705
2038	60	Images\snake40.tif	Threat	-19.4932
2039	1	Images\Trypophobic17.tif	Holes	-37.1377
2039	2	Images\Trypophobic15.tif	Holes	-15.8144
2039	3	Images\butterfly42.tif	Control	-4.16826
2039	4	Images\Object5.tif	Control	-4.048
2039	5	Images\snake25.tif	Threat	-19.9274
2039	6	Images\Trypophobic10.tif	Holes	2.32045
2039	7	Images\Trypophobic8.tif	Holes	1.5702
2039	8	Images\Trypophobic12.tif	Holes	-22.7484
2039	9	Images\snake32.tif	Threat	-31.7347
2039	10	Images\spider21.tif	Threat	-64.0376
2039	11	Images\snake40.tif	Threat	-24.1872
2039	12	Images\frog30.tif	Control	9.46013
2039	13	Images\Trypophobic5.tif	Holes	-4.75934
2039	14	Images\spider22.tif	Threat	22.5682
2039	15	Images\Trypophobic2.tif	Holes	-2.53192
2039	16	Images\Trypophobic7.tif	Holes
2039	17	Images\spider14.tif	Threat
2039	18	Images\spider1.tif	Threat	12.6826
[truncated: 462 more rows]

## Sheet: Experiment 2 - Data
Experiment 2 All Trial Data
Subj	Trial	Image	Category	Fear Ratomg	Disgust Rating	Arousal Rating	Arousal (Absolute Value)	% Pupil Size Change from Baseline	Pupil Size Residuals after controlling for arousal
2000	1	'Images\Trypophobic19.tif'	Holes	2	2	2	2	6.9451	15.4655
2000	2	'Images\Foveating (18).tif'	Control	1	1	0	0	-13.7557	-3.45962
2000	3	'Images\Trypophobic17.tif'	Holes	2	2	2	2	-17.1677	-8.64725
2000	4	'Images\Trypophobic14.tif'	Holes	2	2	2	2	-3.96357	4.55683
2000	5	'Images\Foveating (13).tif'	Control	1	1	0	0	-6.44883	3.84728
2000	6	'Images\Trypophobic18.tif'	Holes					-7.1584
2000	7	'Images\Trypophobic20.tif'	Holes	2	2	2	2	0.526929	9.04733
2000	8	'Images\snake28.tif'	Threat	2	2	2	2	-14.9513	-6.43091
2000	9	'Images\Trypophobic2.tif'	Holes	1	3	-2	2	7.38282	15.9032
2000	10	'Images\Trypophobic12.tif'	Holes					-4.00558
2000	11	'Images\Trypophobic15.tif'	Holes	2	2	2	2	-21.4904	-12.97
2000	12	'Images\snake25.tif'	Threat	1	1	0	0	8.33762	18.6337
2000	13	'Images\Foveating (9).tif'	Control	1	1	-2	2	-10.4729	-1.95253
2000	14	'Images\snake57.tif'	Threat					1.48555
2000	15	'Images\Foveating (3).tif'	Control	2	2	2	2	7.89988	16.4203
2000	16	'Images\Trypophobic7.tif'	Holes	1	6	-2	2	14.1586	22.679
2000	17	'Images\Foveating (6).tif'	Control	1	1	0	0	-4.70522	5.59089
2000	18	'Images\spider8.tif'	Threat	1	1	2	2	22.15	30.6704
2000	19	'Images\snake41.tif'	Threat					-14.8571
2000	20	'Images\Trypophobic16.tif'	Holes	1	1	0	0	0.0357935	10.3319
2000	21	'Images\snake4.tif'	Threat	2	2	2	2	6.54349	15.0639
2000	22	'Images\Trypophobic13.tif'	Holes					-20.095
2000	23	'Images\Foveating (20).tif'	Control	1	1	0	0	5.38579	15.6819
2000	24	'Images\spider22.tif'	Threat	1	1	2	2	2.86474	11.3851
2000	25	'Images\snake22.tif'	Threat	2	2	2	2	-2.06325	6.45715
2000	26	'Images\spider24.tif'	Threat					10.9056
2000	27	'Images\spider1.tif'	Threat	2	2	2	2	26.6087	35.1291
2000	28	'Images\spider14.tif'	Threat	3	1	2	2	-25.3081	-16.7877
2000	29	'Images\Trypophobic5.tif'	Holes	1	4	-3	3	-22.225	-14.5924
2000	30	'Images\spider32.tif'	Threat	1	1	2	2	-18.7041	-10.1837
2000	31	'Images\Foveating (7).tif'	Control					-14.8889
2000	32	'Images\Trypophobic11.tif'	Holes	1	3	-1	1	6.08703	15.4953
2000	33	'Images\Foveating (4).tif'	Control	1	1	0	0	-26.2269	-15.9308
2000	34	'Images\Foveating (14).tif'	Control	1	1	0	0	-4.74043	5.55568
2000	35	'Images\Foveating (11).tif'	Control	1	1	0	0	-15.3617	-5.0656
2000	36	'Images\Foveating (5).tif'	Control	1	1	0	0	14.7232	25.0193
2000	37	'Images\Foveating (17).tif'	Control	1	1	0	0	-2.75663	7.53948
2000	38	'Images\spider29.tif'	Threat	1	1	2	2	-9.06496	-0.54456
2000	39	'Images\spider42.tif'	Threat	1	1	3	3	-8.7172	-1.08466
2000	40	'Images\Trypophobic1.tif'	Holes	2	2	2	2	1.69866	10.2191
2000	41	'Images\Foveating (1).tif'	Control					-15.3615
2000	42	'Images\Trypophobic4.tif'	Holes	2	2	2	2	-10.6651	-2.14467
2000	43	'Images\snake40.tif'	Threat					-9.50279
2000	44	'Images\Foveating (8).tif'	Control	1	1	0	0	12.9459	23.242
2000	45	'Images\Trypophobic9.tif'	Holes	7	7	-3	3	-3.15826	4.47429
2000	46	'Images\spider21.tif'	Threat	2	2	2	2	-3.58372	4.93668
2000	47	'Images\Foveating (10).tif'	Control	2	2	2	2	-4.61209	3.90831
2000	48	'Images\Foveating (12).tif'	Control	1	1	0	0	-10.2212	0.07489
2000	49	'Images\snake26.tif'	Threat	1	1	1	1	-4.34009	5.06817
2000	50	'Images\Foveating (16).tif'	Control	1	1	0	0	-12.1254	-1.82933
2000	51	'Images\Trypophobic8.tif'	Holes	2	2	2	2	-17.0019	-8.48153
2000	52	'Images\Foveating (19).tif'	Control	1	1	0	0	10.5425	20.8386
2000	53	'Images\Trypophobic3.tif'	Holes	1	1	0	0	-8.49877	1.79734
2000	54	'Images\snake43.tif'	Threat	1	1	0	0	-5.17478	5.12133
2000	55	'Images\Trypophobic10.tif'	Holes	2	2	2	2	-5.45784	3.06256
2000	56	'Images\spider55.tif'	Threat	1	1	2	2	11.5357	20.0561
2000	57	'Images\Trypophobic6.tif'	Holes	2	2	2	2	-32.2426	-23.7222
2000	58	'Images\Foveating (15).tif'	Control	1	1	0	0	-2.58816	7.70795
2000	59	'Images\snake32.tif'	Threat					-12.5533
2000	60	'Images\Foveating (2).tif'	Control	1	1	0	0	-26.9371	-16.641
2001	1	'Images\Foveating (16).tif'	Control	2	4	0	0	-20.8416	-10.5455
2001	2	'Images\Foveating (10).tif'	Control	1	1	0	0	-38.6746	-28.3785
2001	3	'Images\Trypophobic4.tif'	Holes	6	5	-2	2	-41.5222	-33.0018
2001	4	'Images\Foveating (2).tif'	Control	1	1	0	0	-25.8148	-15.5187
2001	5	'Images\Foveating (8).tif'	Control	3	3	0	0	-16.7549	-6.45877
2001	6	'Images\Foveating (6).tif'	Control	3	1	-2	2	-28.9623	-20.4419
2001	7	'Images\Foveating (15).tif'	Control	3	2	0	0	-4.56215	5.73396
2001	8	'Images\Foveating (17).tif'	Control	2	2	0	0	-33.1614	-22.8652
2001	9	'Images\snake32.tif'	Threat	4	6	-2	2	-36.6584	-28.138
2001	10	'Images\Trypophobic20.tif'	Holes	3	3	-1	1	-29.8057	-20.3975
2001	11	'Images\snake4.tif'	Threat	7	7	-3	3	2.2136	9.84615
2001	12	'Images\Trypophobic19.tif'	Holes	4	4	-2	2	-31.9748	-23.4544
2001	13	'Images\Foveating (7).tif'	Control	3	3	-2	2	-11.5539	-3.03346
2001	14	'Images\snake22.tif'	Threat	-3	-3	-3	3	-15.5668	-7.93423
2001	15	'Images\snake28.tif'	Threat	5	6	-2	2	-13.4571	-4.93671
2001	16	'Images\Trypophobic2.tif'	Holes	4	3	-2	2	-19.8174	-11.297
2001	17	'Images\Foveating (18).tif'	Control	1	1	0	0	1.95533	12.2514
2001	18	'Images\spider22.tif'	Threat	7	7	-3	3	-26.0196	-18.3871
2001	19	'Images\Trypophobic14.tif'	Holes	1	3	-1	1	-36.2407	-26.8325
2001	20	'Images\Foveating (3).tif'	Control	1	1	0	0	-17.9682	-7.67204
2001	21	'Images\Trypophobic16.tif'	Holes	3	3	0	0	-19.5466	-9.2505
2001	22	'Images\Foveating (12).tif'	Control	1	1	0	0	-30.7161	-20.42
2001	23	'Images\Foveating (19).tif'	Control	1	1	0	0	-8.73047	1.56565
2001	24	'Images\snake25.tif'	Threat	7	7	-2	2	-36.741	-28.2206
2001	25	'Images\Trypophobic10.tif'	Holes	3	3	-1	1	-27.6938	-18.2856
2001	26	'Images\spider24.tif'	Threat	7	7	-3	3	19.7916	27.4241
2001	27	'Images\Trypophobic9.tif'	Holes	3	2	-1	1	-35.4558	-26.0475
2001	28	'Images\snake43.tif'	Threat	7	7	-3	3	-39.8438	-32.2112
2001	29	'Images\Trypophobic18.tif'	Holes	2	4	-1	1	-18.051	-8.64275
2001	30	'Images\Trypophobic17.tif'	Holes	5	5	-3	3	-44.6636	-37.0311
2001	31	'Images\Trypophobic12.tif'	Holes	1	1	0	0	-34.5285	-24.2324
2001	32	'Images\Foveating (4).tif'	Control	2	2	0	0	-18.7284	-8.43232
2001	33	'Images\snake40.tif'	Threat	7	7	-3	3	-34.5736	-26.941
2001	34	'Images\snake41.tif'	Threat	7	7	-3	3	-22.2125	-14.58
2001	35	'Images\Trypophobic15.tif'	Holes	3	4	-1	1	-45.8258	-36.4175
2001	36	'Images\Foveating (14).tif'	Control	1	1	0	0	-6.65308	3.64303
2001	37	'Images\Foveating (9).tif'	Control	1	1	0	0	-19.3562	-9.0601
2001	38	'Images\spider55.tif'	Threat	7	7	-3	3	-13.7308	-6.09822
2001	39	'Images\spider1.tif'	Threat	7	7	-3	3	-11.4407	-3.80812
2001	40	'Images\snake57.tif'	Threat	7	7	-2	2	-32.6877	-24.1673
2001	41	'Images\Trypophobic5.tif'	Holes	4	4	-1	1	-33.345	-23.9368
2001	42	'Images\Trypophobic3.tif'	Holes	2	3	-1	1	-44.7825	-35.3742
2001	43	'Images\Trypophobic7.tif'	Holes	2	4	-1	1	-21.6464	-12.2382
2001	44	'Images\spider14.tif'	Threat	7	7	-2	2	-17.954	-9.43357
2001	45	'Images\Trypophobic6.tif'	Holes	3	2	-1	1	-22.2857	-12.8774
2001	46	'Images\spider21.tif'	Threat	7	7	-3	3	-16.7002	-9.06764
2001	47	'Images\Foveating (13).tif'	Control	1	1	0	0	-22.5783	-12.2822
2001	48	'Images\Foveating (5).tif'	Control	2	3	3	3	15.2407	22.8732
2001	49	'Images\spider42.tif'	Threat	7	7	-3	3	-30.8757	-23.2432
2001	50	'Images\Trypophobic8.tif'	Holes	1	2	0	0	-34.8927	-24.5966
2001	51	'Images\Foveating (11).tif'	Control	1	1	0	0	-12.1984	-1.90229
2001	52	'Images\Trypophobic13.tif'	Holes	4	5	0	0	-36.9794	-26.6833
2001	53	'Images\Foveating (1).tif'	Control	4	4	-1	1	-18.9915	-9.58322
2001	54	'Images\Trypophobic1.tif'	Holes	4	3	-1	1	-26.2617	-16.8534
2001	55	'Images\Trypophobic11.tif'	Holes	3	3	-1	1	-5.9588	3.44946
2001	56	'Images\spider29.tif'	Threat	7	7	-3	3	19.5582	27.1907
2001	57	'Images\spider32.tif'	Threat	7	7	-3	3	-11.3608	-3.72827
2001	58	'Images\spider8.tif'	Threat	7	7	-3	3	-21.9834	-14.3509
2001	59	'Images\Foveating (20).tif'	Control	5	5	1	1	-36.3329	-26.9247
2001	60	'Images\snake26.tif'	Threat	7	7	-3	3	-44.3507	-36.7182
2002	1	'Images\spider42.tif'	Threat	7	6	-3	3	-28.6354	-21.0029
2002	2	'Images\snake28.tif'	Threat	7	5	-2	2	-18.0233	-9.50294
2002	3	'Images\Trypophobic11.tif'	Holes	3	2	-1	1	-8.72939	0.67887
2002	4	'Images\Foveating (19).tif'	Control	1	1	0	0	3.49973	13.7958
2002	5	'Images\Trypophobic4.tif'	Holes	6	6	-3	3	-9.61948	-1.98693
2002	6	'Images\Trypophobic5.tif'	Holes	1	1	1	1	-4.78472	4.62354
2002	7	'Images\Foveating (15).tif'	Control	1	1	-1	1	18.8255	28.2338
2002	8	'Images\Foveating (17).tif'	Control	1	1	0	0	-18.2456	-7.94949
2002	9	'Images\snake43.tif'	Threat	6	6	-2	2	-21.2835	-12.7631
2002	10	'Images\spider8.tif'	Threat	7	6	-2	2	25.8282	34.3486
2002	11	'Images\spider32.tif'	Threat	5	6	-2	2	-6.65582	1.86458
2002	12	'Images\Trypophobic18.tif'	Holes	5	5	-2	2	-12.7968	-4.27644
2002	13	'Images\Trypophobic7.tif'	Holes	1	2	-1	1	-5.82359	3.58467
2002	14	'Images\snake4.tif'	Threat	6	5	-2	2	-20.2896	-11.7692
2002	15	'Images\Trypophobic20.tif'	Holes	5	5	-1	1	-17.9334	-8.52517
2002	16	'Images\Trypophobic13.tif'	Holes	4	4	-2	2	-1.1218	7.3986
2002	17	'Images\Foveating (9).tif'	Control	7	4	-3	3	9.08175	16.7143
2002	18	'Images\Foveating (4).tif'	Control	3	1	-2	2	-9.56757	-1.04717
2002	19	'Images\Foveating (12).tif'	Control	1	1	-1	1	-4.06471	5.34354
2002	20	'Images\snake22.tif'	Threat	7	7	-3	3	-5.91113	1.72141
2002	21	'Images\Foveating (16).tif'	Control	1	1	0	0	6.77614	17.0723
2002	22	'Images\Trypophobic10.tif'	Holes	5	5	-1	1	10.1627	19.571
2002	23	'Images\snake32.tif'	Threat	7	6	-2	2	-23.5151	-14.9947
2002	24	'Images\snake40.tif'	Threat	7	6	-3	3	1.7376	9.37014
2002	25	'Images\Foveating (8).tif'	Control	1	1	0	0	8.89699	19.1931
2002	26	'Images\snake25.tif'	Threat	7	6	-2	2	-12.2318	-3.71138
2002	27	'Images\Foveating (11).tif'	Control	1	1	-1	1	15.4326	24.8409
2002	28	'Images\Trypophobic12.tif'	Holes	1	1	-1	1	4.49001	13.8983
2002	29	'Images\Trypophobic1.tif'	Holes	5	6	-2	2	-4.46596	4.05444
2002	30	'Images\spider22.tif'	Threat	6	5	-2	2	7.52428	16.0447
2002	31	'Images\Trypophobic14.tif'	Holes	2	2	-1	1	-23.3775	-13.9692
2002	32	'Images\Trypophobic15.tif'	Holes	1	1	-1	1	-21.1783	-11.7701
2002	33	'Images\Foveating (13).tif'	Control	4	2	-2	2	-7.95402	0.56638
2002	34	'Images\spider29.tif'	Threat	5	6	-3	3	-2.06531	5.56724
2002	35	'Images\spider21.tif'	Threat	5	6	-3	3	-7.21839	0.41416
2002	36	'Images\Foveating (2).tif'	Control	1	1	-2	2	-17.677	-9.15662
2002	37	'Images\Foveating (6).tif'	Control	1	1	-1	1	-15.8432	-6.43494
2002	38	'Images\Foveating (10).tif'	Control	1	1	0	0	-12.514	-2.21786
2002	39	'Images\spider24.tif'	Threat	6	5	-2	2	6.98523	15.5056
2002	40	'Images\Foveating (7).tif'	Control	1	1	0	0	-15.1165	-4.82037
2002	41	'Images\Trypophobic19.tif'	Holes	6	5	-1	1	1.29528	10.7035
2002	42	'Images\Trypophobic17.tif'	Holes	4	5	-1	1	-14.2666	-4.85835
2002	43	'Images\spider1.tif'	Threat	7	6	-2	2	26.9662	35.4866
2002	44	'Images\snake26.tif'	Threat	6	7	-1	1	-11.8724	-2.46412
2002	45	'Images\Trypophobic9.tif'	Holes	1	4	0	0	-1.25264	9.04347
2002	46	'Images\Foveating (20).tif'	Control	3	1	0	0	-16.1776	-5.88153
2002	47	'Images\snake57.tif'	Threat	6	4	-2	2	18.4165	26.9369
2002	48	'Images\Trypophobic16.tif'	Holes	1	2	0	0	2.37735	12.6735
2002	49	'Images\Foveating (18).tif'	Control	2	1	-1	1	-10.8517	-1.44344
2002	50	'Images\Trypophobic6.tif'	Holes	4	4	-2	2	-16.66	-8.13957
2002	51	'Images\Foveating (3).tif'	Control	1	1	-1	1	16.8227	26.231
2002	52	'Images\Foveating (14).tif'	Control	1	1	-2	2	-17.7013	-9.18093
2002	53	'Images\Trypophobic3.tif'	Holes	4	6	-1	1	-6.36679	3.04147
2002	54	'Images\Trypophobic2.tif'	Holes	4	5	-1	1	-19.5774	-10.1691
2002	55	'Images\spider14.tif'	Threat	7	6	-2	2	-23.9706	-15.4502
2002	56	'Images\snake41.tif'	Threat	7	6	-3	3	-8.70145	-1.06891
2002	57	'Images\Trypophobic8.tif'	Holes	1	1	0	0	7.16991	17.466
2002	58	'Images\Foveating (5).tif'	Control	1	1	0	0	-4.76407	5.53204
2002	59	'Images\spider55.tif'	Threat	6	6	-2	2	-14.6375	-6.11705
2002	60	'Images\Foveating (1).tif'	Control	1	1	0	0	-10.8087	-0.51258
2003	1	'Images\Foveating (7).tif'	Control	1	1	1	1	-1.73863	7.66963
2003	2	'Images\Foveating (4).tif'	Control	1	1	1	1	-36.6785	-27.2703
2003	3	'Images\Foveating (15).tif'	Control	1	1	0	0	-11.9185	-1.62235
2003	4	'Images\Trypophobic19.tif'	Holes	1	2	0	0	-2.91016	7.38595
2003	5	'Images\Foveating (12).tif'	Control	1	1	-1	1	-18.6763	-9.26806
2003	6	'Images\Trypophobic3.tif'	Holes	1	1	1	1	-21.659	-12.2507
2003	7	'Images\Trypophobic8.tif'	Holes	1	1	0	0	-8.77156	1.52456
2003	8	'Images\snake43.tif'	Threat	1	1	0	0	-26.0271	-15.7309
2003	9	'Images\Trypophobic12.tif'	Holes	1	1	2	2	-17.5454	-9.02499
2003	10	'Images\Foveating (11).tif'	Control	1	1	0	0	-6.31208	3.98403
2003	11	'Images\snake26.tif'	Threat	1	2	-1	1	-19.1492	-9.74091
2003	12	'Images\spider55.tif'	Threat	1	2	-1	1	9.0341	18.4424
2003	13	'Images\snake32.tif'	Threat	1	1	1	1	-27.5496	-18.1413
2003	14	'Images\Foveating (16).tif'	Control	1	1	0	0	-25.3569	-15.0607
2003	15	'Images\Foveating (10).tif'	Control	1	1	1	1	5.2276	14.6359
2003	16	'Images\Trypophobic2.tif'	Holes	1	1	0	0	-6.55779	3.73833
2003	17	'Images\Trypophobic6.tif'	Holes	1	1	1	1	-14.5217	-5.11347
2003	18	'Images\spider42.tif'	Threat	1	2	-1	1	-29.0547	-19.6465
2003	19	'Images\Foveating (6).tif'	Control	1	1	1	1	-6.04821	3.36005
2003	20	'Images\Foveating (14).tif'	Control	1	1	0	0	-19.2878	-8.99171
2003	21	'Images\snake57.tif'	Threat	1	1	0	0	1.97054	12.2667
2003	22	'Images\Foveating (3).tif'	Control	1	1	0	0	-3.19991	7.0962
2003	23	'Images\snake40.tif'	Threat	1	2	-1	1	-12.9922	-3.58391
2003	24	'Images\spider8.tif'	Threat	1	2	-1	1	-0.245367	9.16289
2003	25	'Images\snake22.tif'	Threat	1	1	1	1	-8.95259	0.45566
2003	26	'Images\Trypophobic5.tif'	Holes	1	1	0	0	-16.0749	-5.77876
2003	27	'Images\snake25.tif'	Threat	2	1	-1	1	-8.09156	1.3167
2003	28	'Images\Trypophobic9.tif'	Holes	1	2	-1	1	-11.1182	-1.70995
2003	29	'Images\snake41.tif'	Threat	1	2	-1	1	-9.59625	-0.18799
2003	30	'Images\Trypophobic7.tif'	Holes	1	1	0	0	-8.48678	1.80933
2003	31	'Images\Foveating (19).tif'	Control	1	1	0	0	-11.9219	-1.62574
2003	32	'Images\spider22.tif'	Threat	1	2	-1	1	4.88059	14.2889
2003	33	'Images\Trypophobic10.tif'	Holes	1	2	0	0	1.70322	11.9993
2003	34	'Images\Trypophobic15.tif'	Holes	1	1	1	1	-36.2031	-26.7948
2003	35	'Images\Trypophobic1.tif'	Holes	1	1	0	0	-26.1178	-15.8217
2003	36	'Images\snake4.tif'	Threat	1	1	0	0	7.90905	18.2052
2003	37	'Images\Foveating (18).tif'	Control	1	1	0	0	-28.6996	-18.4035
2003	38	'Images\spider21.tif'	Threat	1	1	-1	1	-8.52085	0.88741
2003	39	'Images\Trypophobic11.tif'	Holes	1	1	1	1	12.2063	21.6145
2003	40	'Images\Trypophobic17.tif'	Holes	2	1	-1	1	-24.0069	-14.5987
2003	41	'Images\Trypophobic16.tif'	Holes	1	1	0	0	11.2748	21.5709
2003	42	'Images\Foveating (5).tif'	Control	1	1	0	0	-1.78198	8.51413
2003	43	'Images\snake28.tif'	Threat	1	1	1	1	-20.4203	-11.012
2003	44	'Images\Foveating (17).tif'	Control	1	1	0	0	-18.2823	-7.98614
2003	45	'Images\Foveating (8).tif'	Control	1	1	0	0	-2.02983	8.26628
2003	46	'Images\Foveating (13).tif'	Control	1	1	-1	1	-25.1225	-15.7142
2003	47	'Images\spider24.tif'	Threat	1	1	1	1	7.99059	17.3988
2003	48	'Images\Foveating (9).tif'	Control	1	1	0	0	-4.58144	5.71468
2003	49	'Images\Trypophobic18.tif'	Holes	1	1	-1	1	0.275396	9.68365
2003	50	'Images\spider29.tif'	Threat	1	3	0	0	-21.0557	-10.7596
2003	51	'Images\Foveating (20).tif'	Control	1	1	1	1	-13.9117	-4.50344
2003	52	'Images\Trypophobic4.tif'	Holes	1	1	1	1	0.164463	9.57272
2003	53	'Images\Foveating (2).tif'	Control	1	1	0	0	-28.9015	-18.6054
2003	54	'Images\Trypophobic13.tif'	Holes	1	1	1	1	-26.2036	-16.7953
2003	55	'Images\Trypophobic20.tif'	Holes	1	2	-1	1	1.8828	11.2911
2003	56	'Images\spider32.tif'	Threat	1	2	-1	1	-14.2124	-4.80415
2003	57	'Images\spider14.tif'	Threat	1	2	-1	1	-19.1861	-9.77783
2003	58	'Images\Trypophobic14.tif'	Holes	1	1	-1	1	-7.70074	1.70751
2003	59	'Images\Foveating (1).tif'	Control	1	1	0	0	-6.086	4.21011
2003	60	'Images\spider1.tif'	Threat	2	2	-1	1	21.7483	31.1566
2004	1	'Images\Trypophobic12.tif'	Holes	1	1	1	1	-19.9165	-10.5083
2004	2	'Images\Foveating (17).tif'	Control	1	1	1	1	-26.9577	-17.5494
2004	3	'Images\spider42.tif'	Threat	5	7	-3	3	-36.7388	-29.1063
2004	4	'Images\Trypophobic20.tif'	Holes	1	1	0	0	-17.9047	-7.6086
2004	5	'Images\Foveating (18).tif'	Control	1	1	-1	1	10.9878	20.3961
2004	6	'Images\Trypophobic13.tif'	Holes	1	1	-1	1	-24.587	-15.1787
2004	7	'Images\snake40.tif'	Threat	5	3	-2	2	-16.2554	-7.73497
2004	8	'Images\Foveating (14).tif'	Control	1	1	1	1	-21.1763	-11.7681
2004	9	'Images\Trypophobic15.tif'	Holes	2	1	-1	1	-43.5714	-34.1632
2004	10	'Images\Trypophobic7.tif'	Holes	2	2	-1	1	-6.20309	3.20517
2004	11	'Images\Trypophobic16.tif'	Holes	1	1	0	0	-16.3818	-6.08565
2004	12	'Images\spider32.tif'	Threat	6	5	-3	3	-3.98404	3.6485
2004	13	'Images\Trypophobic4.tif'	Holes	2	3	-1	1	-17.9223	-8.51404
2004	14	'Images\Trypophobic10.tif'	Holes	-1	1	-1	1	0.137352	9.54561
2004	15	'Images\snake57.tif'	Threat	4	4	-2	2	-1.58007	6.94033
2004	16	'Images\Foveating (12).tif'	Control	1	1	0	0	-42.6128	-32.3167
2004	17	'Images\Foveating (2).tif'	Control	1	1	1	1	-0.328149	9.08011
2004	18	'Images\Foveating (7).tif'	Control	1	1	-1	1	-20.245	-10.8368
2004	19	'Images\spider8.tif'	Threat	6	6	-3	3	0.990937	8.62348
2004	20	'Images\Trypophobic6.tif'	Holes	1	1	0	0	-14.2414	-3.94525
2004	21	'Images\spider22.tif'	Threat	6	6	-3	3	29.9323	37.5649
2004	22	'Images\Foveating (5).tif'	Control	1	1	0	0	-7.18279	3.11332
2004	23	'Images\Trypophobic2.tif'	Holes	1	1	0	0	-17.9684	-7.67228
2004	24	'Images\snake4.tif'	Threat	4	3	-1	1	6.31007	15.7183
2004	25	'Images\Foveating (3).tif'	Control	1	1	2	2	-14.8553	-6.33488
2004	26	'Images\Foveating (4).tif'	Control	1	1	2	2	-21.399	-12.8787
2004	27	'Images\Foveating (16).tif'	Control	1	1	0	0	9.99653	20.2926
2004	28	'Images\Foveating (19).tif'	Control	1	1	0	0	20.1579	30.454
2004	29	'Images\spider55.tif'	Threat	5	5	-3	3	0.0462851	7.67883
2004	30	'Images\Foveating (6).tif'	Control	1	1	1	1	0.576066	9.98432
2004	31	'Images\spider14.tif'	Threat	5	6	-2	2	-24.788	-16.2676
2004	32	'Images\Foveating (10).tif'	Control	1	1	0	0	15.4801	25.7762
2004	33	'Images\Foveating (11).tif'	Control	1	1	0	0	-12.9572	-2.66111
2004	34	'Images\snake26.tif'	Threat	3	2	-1	1	-15.5402	-6.13192
2004	35	'Images\Foveating (8).tif'	Control	1	1	0	0	-14.7402	-4.44412
2004	36	'Images\Trypophobic18.tif'	Holes	4	2	-1	1	-3.72089	5.68737
2004	37	'Images\spider1.tif'	Threat	6	7	-3	3	12.5321	20.1647
2004	38	'Images\Foveating (9).tif'	Control	2	1	-1	1	-3.02681	6.38145
2004	39	'Images\snake25.tif'	Threat	3	2	-1	1	-20.9085	-11.5003
2004	40	'Images\Foveating (13).tif'	Control	2	1	-1	1	-37.8743	-28.4661
2004	41	'Images\spider29.tif'	Threat	6	6	-3	3	-9.33348	-1.70093
2004	42	'Images\Trypophobic3.tif'	Holes	2	1	0	0	6.65666	16.9528
2004	43	'Images\snake22.tif'	Threat	3	2	-2	2	4.83743	13.3578
2004	44	'Images\spider24.tif'	Threat	6	4	-2	2	-6.90025	1.62015
2004	45	'Images\Trypophobic19.tif'	Holes	3	3	-1	1	12.7173	22.1256
2004	46	'Images\Trypophobic5.tif'	Holes	1	1	2	2	-22.2405	-13.7201
2004	47	'Images\snake32.tif'	Threat	4	1	-2	2	-29.8538	-21.3334
2004	48	'Images\Trypophobic14.tif'	Holes	2	1	0	0	-18.5976	-8.30145
2004	49	'Images\snake28.tif'	Threat	3	1	-2	2	-7.77434	0.74606
2004	50	'Images\Foveating (15).tif'	Control	1	1	0	0	-12.385	-2.08889
2004	51	'Images\Trypophobic8.tif'	Holes	1	2	0	0	-23.5992	-13.3031
2004	52	'Images\Foveating (20).tif'	Control	1	1	-1	1	23.3318	32.74
2004	53	'Images\spider21.tif'	Threat	6	6	-3	3	-29.9065	-22.2739
2004	54	'Images\Trypophobic1.tif'	Holes	1	2	-1	1	5.64352	15.0518
2004	55	'Images\Trypophobic11.tif'	Holes	1	1	-1	1	-18.9537	-9.54546
2004	56	'Images\snake41.tif'	Threat	4	2	-1	1	-19.2454	-9.83715
2004	57	'Images\snake43.tif'	Threat	2	2	0	0	-12.1088	-1.81264
2004	58	'Images\Trypophobic9.tif'	Holes	2	2	-1	1	-11.3023	-1.89407
2004	59	'Images\Trypophobic17.tif'	Holes	2	2	-1	1	-26.2503	-16.8421
2004	60	'Images\Foveating (1).tif'	Control	1	1	0	0	-10.6338	-0.33768
2006	1	'Images\Trypophobic3.tif'	Holes	4	4	-2	2	-48.3991	-39.8787
2006	2	'Images\Foveating (12).tif'	Control	1	3	0	0	-25.6317	-15.3356
2006	3	'Images\Foveating (10).tif'	Control	2	1	1	1	-2.90088	6.50737
2006	4	'Images\Foveating (3).tif'	Control	1	1	1	1	-4.13353	5.27473
2006	5	'Images\Foveating (11).tif'	Control	1	1	0	0	10.1767	20.4728
2006	6	'Images\Foveating (4).tif'	Control	1	1	0	0	-33.2507	-22.9545
2006	7	'Images\Trypophobic2.tif'	Holes	3	2	-1	1	39.4083	48.8166
2006	8	'Images\spider8.tif'	Threat	2	2	-2	2	52.8168	61.3372
2006	9	'Images\Trypophobic4.tif'	Holes	4	5	-2	2	1.02213	9.54253
2006	10	'Images\Foveating (6).tif'	Control	1	1	0	0	24.9906	35.2867
2006	11	'Images\spider1.tif'	Threat	2	2	0	0	1.1676	11.4637
2006	12	'Images\snake28.tif'	Threat	2	2	0	0	-16.3372	-6.04112
2006	13	'Images\snake32.tif'	Threat	2	2	0	0	-20.5385	-10.2424
2006	14	'Images\snake26.tif'	Threat	3	2	0	0	59.6454	69.9415
2006	15	'Images\Foveating (9).tif'	Control	1	1	0	0	-32.2026	-21.9065
2006	16	'Images\Foveating (13).tif'	Control	3	2	0	0	-48.0679	-37.7718
2006	17	'Images\spider29.tif'	Threat	2	2	-1	1	-14.7851	-5.37682
2006	18	'Images\Trypophobic17.tif'	Holes	4	5	-2	2	-31.0623	-22.5419
2006	19	'Images\Foveating (8).tif'	Control	1	3	0	0	44.7588	55.0549
2006	20	'Images\spider22.tif'	Threat	3	3	-1	1	75.6197	85.028
2006	21	'Images\Trypophobic1.tif'	Holes	4	2	-2	2	-24.3861	-15.8657
2006	22	'Images\snake40.tif'	Threat	1	1	0	0	-42.5704	-32.2743
2006	23	'Images\Trypophobic12.tif'	Holes	1	1	-3	3	11.0049	18.6374
2006	24	'Images\Foveating (15).tif'	Control	1	1	0	0	-34.255	-23.9589
2006	25	'Images\Foveating (18).tif'	Control	2	1	-2	2	20.314	28.8344
2006	26	'Images\Foveating (20).tif'	Control	1	1	0	0	-34.8846	-24.5885
2006	27	'Images\Trypophobic11.tif'	Holes	2	2	-1	1	-8.76521	0.64305
2006	28	'Images\Trypophobic13.tif'	Holes	4	4	-1	1	-9.56701	-0.15875
2006	29	'Images\Trypophobic9.tif'	Holes	3	4	0	0	42.3062	52.6023
2006	30	'Images\snake57.tif'	Threat	1	1	0	0	-6.69605	3.60006
2006	31	'Images\Foveating (14).tif'	Control	1	1	0	0	-37.0737	-26.7776
2006	32	'Images\Trypophobic8.tif'	Holes	2	2	0	0	-17.1829	-6.88681
2006	33	'Images\snake4.tif'	Threat	2	2	0	0	-25.6528	-15.3567
2006	34	'Images\Foveating (16).tif'	Control	1	2	0	0	-25.4934	-15.1973
2006	35	'Images\snake22.tif'	Threat	3	3	-1	1	-20.4099	-11.0016
2006	36	'Images\spider14.tif'	Threat	3	3	-2	2	-1.39639	7.12401
2006	37	'Images\Trypophobic20.tif'	Holes	1	2	-2	2	-14.6056	-6.08515
2006	38	'Images\Trypophobic7.tif'	Holes	3	3	-2	2	20.0309	28.5513
2006	39	'Images\snake43.tif'	Threat	2	2	-1	1	-41.678	-32.2697
2006	40	'Images\snake41.tif'	Threat	3	2	0	0	-19.7857	-9.48962
2006	41	'Images\Trypophobic18.tif'	Holes	4	5	-3	3	-6.36488	1.26766
2006	42	'Images\spider42.tif'	Threat	2	2	-2	2	21.8011	30.3215
2006	43	'Images\Trypophobic14.tif'	Holes	3	3	-1	1	-29.3975	-19.9892
2006	44	'Images\spider55.tif'	Threat	2	2	2	2	29.5576	38.078
2006	45	'Images\Trypophobic6.tif'	Holes	4	4	-2	2	-52.5295	-44.0091
2006	46	'Images\Foveating (17).tif'	Control	1	1	0	0	-18.8974	-8.60127
2006	47	'Images\Trypophobic19.tif'	Holes	2	3	-2	2	-20.848	-12.3276
2006	48	'Images\Foveating (5).tif'	Control	1	1	0	0	19.6902	29.9863
2006	49	'Images\Trypophobic15.tif'	Holes	2	2	2	2	-47.6759	-39.1555
2006	50	'Images\snake25.tif'	Threat	4	4	-2	2	-5.04343	3.47697
2006	51	'Images\Trypophobic16.tif'	Holes	3	2	-1	1	14.3665	23.7747
2006	52	'Images\Foveating (19).tif'	Control	1	1	2	2	-13.5876	-5.06716
2006	53	'Images\spider21.tif'	Threat	3	3	-1	1	-10.1448	-0.73654
2006	54	'Images\spider24.tif'	Threat	3	2	-2	2	-26.4031	-17.8827
2006	55	'Images\Foveating (1).tif'	Control	1	1	0	0	-32.3309	-22.0348
2006	56	'Images\Foveating (7).tif'	Control	1	1	0	0	-43.0624	-32.7662
2006	57	'Images\spider32.tif'	Threat	3	3	-2	2	5.26075	13.7812
2006	58	'Images\Foveating (2).tif'	Control	1	1	2	2	-33.1187	-24.5983
2006	59	'Images\Trypophobic5.tif'	Holes	2	2	-2	2	17.4209	25.9413
2006	60	'Images\Trypophobic10.tif'	Holes	2	2	-2	2	-28.3255	-19.8051
2007	1	'Images\Trypophobic4.tif'	Holes	1	1	0	0	-61.9683	-51.6722
2007	2	'Images\Trypophobic19.tif'	Holes	1	1	0	0	-40.6433	-30.3472
2007	3	'Images\Foveating (5).tif'	Control	1	1	1	1	-30.3062	-20.898
2007	4	'Images\Foveating (6).tif'	Control	1	1	0	0	-36.3648	-26.0687
2007	5	'Images\Trypophobic10.tif'	Holes	1	1	0	0	-4.46145	5.83466
2007	6	'Images\snake43.tif'	Threat	1	1	0	0	-28.306	-18.0099
2007	7	'Images\spider55.tif'	Threat	6	6	-2	2	7.87955	16.4
2007	8	'Images\spider32.tif'	Threat	4	4	-2	2	-24.4079	-15.8875
2007	9	'Images\spider1.tif'	Threat	4	4	-1	1	-10.3801	-0.97184
2007	10	'Images\Trypophobic18.tif'	Holes	1	1	1	1	2.61042	12.0187
2007	11	'Images\Foveating (15).tif'	Control	1	1	0	0	-27.9159	-17.6198
2007	12	'Images\snake4.tif'	Threat	1	3	0	0	-32.1156	-21.8195
2007	13	'Images\Trypophobic15.tif'	Holes	1	1	0	0	-56.917	-46.6209
2007	14	'Images\spider42.tif'	Threat	6	6	-3	3	-13.972	-6.33946
2007	15	'Images\spider24.tif'	Threat	6	6	-2	2	-15.7001	-7.17966
2007	16	'Images\Trypophobic17.tif'	Holes	1	1	0	0	-44.2815	-33.9854
2007	17	'Images\Foveating (13).tif'	Control	1	1	0	0	-22.3841	-12.088
2007	18	'Images\spider8.tif'	Threat	6	6	-2	2	-8.35702	0.16338
2007	19	'Images\spider21.tif'	Threat	6	6	-2	2	-32.6322	-24.1118
2007	20	'Images\spider14.tif'	Threat	6	5	-2	2
2007	21	'Images\snake26.tif'	Threat	1	1	0	0	-35.2145	-24.9184
2007	22	'Images\Trypophobic12.tif'	Holes	1	1	1	1	1.48267	10.8909
2007	23	'Images\Foveating (7).tif'	Control	1	1	0	0	-51.8056	-41.5095
2007	24	'Images\Trypophobic8.tif'	Holes	1	1	0	0	-23.2269	-12.9308
2007	25	'Images\Trypophobic6.tif'	Holes	1	1	0	0	-25.9033	-15.6072
2007	26	'Images\Foveating (20).tif'	Control	1	1	0	0	-35.7699	-25.4738
2007	27	'Images\snake28.tif'	Threat	1	1	0	0	-60.3616	-50.0655
2007	28	'Images\Trypophobic16.tif'	Holes	1	1	0	0	26.534	36.8301
2007	29	'Images\spider22.tif'	Threat	5	5	-2	2	13.2175	21.7379
2007	30	'Images\Foveating (3).tif'	Control	1	1	0	0	-31.3384	-21.0423
2007	31	'Images\snake22.tif'	Threat	1	2	0	0	-47.9156	-37.6195
2007	32	'Images\Trypophobic13.tif'	Holes	1	1	0	0	-3.34675	6.94937
2007	33	'Images\snake57.tif'	Threat	1	2	0	0	11.3754	21.6715
2007	34	'Images\Trypophobic11.tif'	Holes	1	1	0	0	-12.3906	-2.09448
2007	35	'Images\Trypophobic14.tif'	Holes	1	1	0	0	-25.0574	-14.7612
2007	36	'Images\Foveating (18).tif'	Control	1	1	0	0	-47.3251	-37.029
2007	37	'Images\Foveating (9).tif'	Control	1	1	0	0	-3.13871	7.15741
2007	38	'Images\Foveating (11).tif'	Control	1	1	0	0	15.2638	25.5599
2007	39	'Images\spider29.tif'	Threat	7	7	-3	3	-24.9389	-17.3064
2007	40	'Images\Trypophobic9.tif'	Holes	1	1	0	0	14.0408	24.3369
2007	41	'Images\Trypophobic2.tif'	Holes	1	1	0	0	-31.9416	-21.6455
2007	42	'Images\snake40.tif'	Threat	1	1	0	0	-33.69	-23.3938
2007	43	'Images\Foveating (16).tif'	Control	1	1	0	0	38.8796	49.1757
2007	44	'Images\Foveating (8).tif'	Control	1	1	0	0	-16.9556	-6.65947
2007	45	'Images\Foveating (1).tif'	Control	1	1	0	0	24.2352	34.5313
2007	46	'Images\Foveating (12).tif'	Control	1	1	0	0	-4.19812	6.09799
2007	47	'Images\Foveating (2).tif'	Control	1	1	0	0	-13.1623	-2.86614
2007	48	'Images\snake25.tif'	Threat	2	1	0	0	-12.0808	-1.7847
2007	49	'Images\Foveating (19).tif'	Control	1	1	0	0	59.261	69.5571
2007	50	'Images\Foveating (4).tif'	Control	1	1	0	0	-0.991463	9.30465
2007	51	'Images\Trypophobic7.tif'	Holes	1	1	0	0	-31.7136	-21.4175
2007	52	'Images\Trypophobic5.tif'	Holes	1	1	0	0	17.1573	27.4534
2007	53	'Images\Trypophobic1.tif'	Holes	1	1	0	0	-65.0804	-54.7843
2007	54	'Images\snake41.tif'	Threat	3	3	0	0	25.244	35.5401
2007	55	'Images\Foveating (14).tif'	Control	1	1	0	0	-29.3466	-19.0505
2007	56	'Images\Foveating (10).tif'	Control	1	1	0	0	28.6257	38.9218
2007	57	'Images\Foveating (17).tif'	Control	1	1	0	0	-39.2589	-28.9627
2007	58	'Images\Trypophobic3.tif'	Holes	1	1	0	0	-17.4601	-7.16402
2007	59	'Images\snake32.tif'	Threat	2	1	0	0	4.20916	14.5053
2007	60	'Images\Trypophobic20.tif'	Holes	1	1	0	0	6.40114	16.6973
2008	1	'Images\Foveating (12).tif'	Control	1	1	0	0	-41.7686	-31.4725
2008	2	'Images\snake25.tif'	Threat	3	5	-2	2	-18.1306	-9.61019
2008	3	'Images\spider8.tif'	Threat	3	6	-1	1	-17.1818	-7.77353
2008	4	'Images\Trypophobic17.tif'	Holes	2	7	-2	2	-18.7066	-10.1862
2008	5	'Images\Foveating (17).tif'	Control	1	1	0	0	-24.4656	-14.1695
2008	6	'Images\Trypophobic8.tif'	Holes	1	3	-1	1	-5.21319	4.19506
2008	7	'Images\snake4.tif'	Threat	2	6	-1	1	-17.6138	-8.20557
2008	8	'Images\Trypophobic2.tif'	Holes	1	3	-1	1	-45.8027	-36.3945
2008	9	'Images\Foveating (19).tif'	Control	1	1	0	0	1.48601	11.7821
2008	10	'Images\spider32.tif'	Threat	2	5	-1	1	-21.2775	-11.8692
2008	11	'Images\spider29.tif'	Threat	2	5	-1	1	0.816183	10.2244
2008	12	'Images\snake43.tif'	Threat	5	5	-1	1	30.5448	39.9531
2008	13	'Images\Foveating (7).tif'	Control	1	1	0	0	29.3524	39.6485
2008	14	'Images\Trypophobic16.tif'	Holes	1	3	-1	1	-4.94926	4.459
2008	15	'Images\snake26.tif'	Threat	4	6	-2	2	-12.9327	-4.41226
2008	16	'Images\Trypophobic4.tif'	Holes	2	5	-1	1	-59.2216	-49.8133
2008	17	'Images\Foveating (9).tif'	Control	1	1	1	1	-25.6632	-16.255
2008	18	'Images\Trypophobic1.tif'	Holes	2	2	2	2	-23.5558	-15.0354
2008	19	'Images\Trypophobic12.tif'	Holes	1	1	2	2	-15.5506	-7.03016
2008	20	'Images\Foveating (6).tif'	Control	1	1	2	2	-23.4464	-14.926
2008	21	'Images\spider1.tif'	Threat	3	4	-2	2	7.05173	15.5721
2008	22	'Images\Foveating (4).tif'	Control	1	1	0	0	-30.3198	-20.0237
2008	23	'Images\spider21.tif'	Threat	3	6	-2	2	-35.6174	-27.097
2008	24	'Images\Foveating (18).tif'	Control	1	1	0	0	-17.6068	-7.31065
2008	25	'Images\Trypophobic10.tif'	Holes	2	4	-1	1	3.10167	12.5099
2008	26	'Images\Trypophobic15.tif'	Holes	3	4	-1	1	-31.9749	-22.5667
2008	27	'Images\snake40.tif'	Threat	2	6	-2	2	-34.0567	-25.5363
2008	28	'Images\snake41.tif'	Threat	2	6	-1	1	2.43738	11.8456
2008	29	'Images\Foveating (5).tif'	Control	1	1	0	0	-3.46856	6.82755
2008	30	'Images\Trypophobic19.tif'	Holes	1	6	-2	2	3.22898	11.7494
2008	31	'Images\snake57.tif'	Threat	4	6	-1	1	-8.38242	1.02584
2008	32	'Images\Trypophobic3.tif'	Holes	2	3	-1	1	-32.6021	-23.1938
2008	33	'Images\spider14.tif'	Threat	2	4	-1	1	29.6358	39.0441
2008	34	'Images\snake32.tif'	Threat	4	6	-2	2	-38.2986	-29.7782
2008	35	'Images\Foveating (1).tif'	Control	1	1	0	0	9.67699	19.9731
2008	36	'Images\spider42.tif'	Threat	2	6	-1	1	10.1668	19.5751
2008	37	'Images\Trypophobic5.tif'	Holes	2	5	-1	1	-53.2917	-43.8834
2008	38	'Images\Foveating (8).tif'	Control	1	1	0	0	26.2953	36.5914
2008	39	'Images\Trypophobic6.tif'	Holes	2	4	-1	1	-14.2883	-4.88008
2008	40	'Images\Foveating (11).tif'	Control	1	1	0	0	-15.541	-5.24484
2008	41	'Images\Trypophobic20.tif'	Holes	1	2	0	0	7.1688	17.4649
2008	42	'Images\snake22.tif'	Threat	1	4	-2	2	14.2193	22.7398
2008	43	'Images\spider24.tif'	Threat	2	6	-2	2	76.2804	84.8008
2008	44	'Images\Foveating (13).tif'	Control	1	1	0	0	-36.5371	-26.241
2008	45	'Images\Foveating (14).tif'	Control	1	1	0	0	-4.11605	6.18007
2008	46	'Images\snake28.tif'	Threat	4	6	-2	2	-53.2792	-44.7588
2008	47	'Images\Foveating (3).tif'	Control	1	1	0	0	-8.19458	2.10154
2008	48	'Images\Foveating (10).tif'	Control	1	1	0	0	-12.987	-2.69086
2008	49	'Images\Foveating (15).tif'	Control	1	1	0	0	6.99975	17.2959
2008	50	'Images\Foveating (2).tif'	Control	1	1	0	0	-29.2547	-18.9586
2008	51	'Images\Trypophobic14.tif'	Holes	2	5	-2	2	-33.9138	-25.3934
2008	52	'Images\Foveating (16).tif'	Control	1	1	0	0	-13.7387	-3.44262
2008	53	'Images\Foveating (20).tif'	Control	1	1	0	0	-15.1122	-4.81609
2008	54	'Images\Trypophobic11.tif'	Holes	1	3	-1	1	9.53751	18.9458
2008	55	'Images\Trypophobic18.tif'	Holes	2	6	-2	2	-18.3325	-9.81213
2008	56	'Images\spider55.tif'	Threat	6	6	-2	2	-5.9088	2.6116
2008	57	'Images\Trypophobic13.tif'	Holes	2	3	-1	1	-34.7208	-25.3125
2008	58	'Images\Trypophobic7.tif'	Holes	1	2	-1	1	-32.6594	-23.2512
2008	59	'Images\spider22.tif'	Threat	3	3	-2	2	35.0623	43.5827
2008	60	'Images\Trypophobic9.tif'	Holes	1	3	-1	1	11.9734	21.3816
2009	1	'Images\spider22.tif'	Threat	1	3	-2	2	-4.60312	3.91728
2009	2	'Images\snake25.tif'	Threat	5	5	-1	1	-21.3341	-11.9258
2009	3	'Images\spider55.tif'	Threat	2	2	0	0	3.44198	13.7381
2009	4	'Images\Trypophobic1.tif'	Holes	1	6	-2	2	-9.20971	-0.68931
2009	5	'Images\Foveating (11).tif'	Control	1	1	-3	3	-2.30029	5.33226
2009	6	'Images\Trypophobic5.tif'	Holes	1	1	3	3	-14.8923	-7.25979
2009	7	'Images\Foveating (8).tif'	Control	1	1	-1	1	-11.397	-1.98877
2009	8	'Images\Foveating (13).tif'	Control	1	1	0	0	-31.8365	-21.5404
2009	9	'Images\snake43.tif'	Threat	1	1	-1	1	-2.7296	6.67866
2009	10	'Images\Trypophobic17.tif'	Holes	1	1	0	0	-30.8405	-20.5444
2009	11	'Images\Foveating (17).tif'	Control	1	1	0	0	-21.09	-10.7939
2009	12	'Images\Foveating (9).tif'	Control	4	1	2	2	-23.4473	-14.9269
2009	13	'Images\Trypophobic15.tif'	Holes	1	1	0	0	-32.0998	-21.8037
2009	14	'Images\Trypophobic9.tif'	Holes	1	3	2	2	-1.463	7.0574
2009	15	'Images\snake4.tif'	Threat	3	2	-1	1	-5.89101	3.51724
2009	16	'Images\Trypophobic14.tif'	Holes	1	5	-3	3	-21.2746	-13.642
2009	17	'Images\spider14.tif'	Threat	1	3	0	0	-18.4654	-8.1693
2009	18	'Images\Trypophobic10.tif'	Holes	6	5	-3	3	-6.53002	1.10253
2009	19	'Images\Trypophobic3.tif'	Holes	3	3	-1	1	-25.8015	-16.3932
2009	20	'Images\snake41.tif'	Threat	1	1	0	0	-7.55245	2.74366
2009	21	'Images\Foveating (15).tif'	Control	1	1	2	2	-15.9109	-7.39054
2009	22	'Images\snake32.tif'	Threat	1	2	1	1	-20.4114	-11.0032
2009	23	'Images\Foveating (2).tif'	Control	1	1	3	3	-17.5737	-9.94113
2009	24	'Images\Foveating (12).tif'	Control	1	1	2	2	-23.6083	-15.0879
2009	25	'Images\Foveating (19).tif'	Control	1	1	0	0	13.5857	23.8818
2009	26	'Images\Foveating (7).tif'	Control	1	1	1	1	-13.1385	-3.73024
2009	27	'Images\Trypophobic6.tif'	Holes	1	1	0	0	-32.3184	-22.0223
2009	28	'Images\Foveating (20).tif'	Control	1	1	-2	2	-3.15604	5.36436
2009	29	'Images\Trypophobic12.tif'	Holes	1	1	-1	1	-2.66243	6.74583
2009	30	'Images\spider24.tif'	Threat	2	7	-2	2	3.1229	11.6433
2009	31	'Images\Foveating (16).tif'	Control	1	1	-2	2	-15.0072	-6.48682
2009	32	'Images\Trypophobic2.tif'	Holes	1	5	-2	2	-15.1596	-6.63925
2009	33	'Images\Trypophobic8.tif'	Holes	1	7	-3	3	13.7401	21.3727
2009	34	'Images\Foveating (3).tif'	Control	1	1	0	0	-15.4752	-5.17911
2009	35	'Images\Foveating (10).tif'	Control	1	1	2	2	-4.18145	4.33895
2009	36	'Images\Foveating (4).tif'	Control	1	1	-1	1	-15.2877	-5.87945
2009	37	'Images\spider21.tif'	Threat	2	2	0	0	-7.15836	3.13775
2009	38	'Images\snake28.tif'	Threat	1	1	3	3	-21.8135	-14.1809
2009	39	'Images\Foveating (6).tif'	Control	1	1	3	3	-18.1803	-10.5477
2009	40	'Images\snake22.tif'	Threat	1	1	-1	1	-6.17835	3.22991
2009	41	'Images\Trypophobic20.tif'	Holes	1	5	-1	1	-26.8341	-17.4258
2009	42	'Images\Trypophobic18.tif'	Holes	1	5	-1	1	-1.02389	8.38437
2009	43	'Images\Trypophobic16.tif'	Holes	1	7	-3	3	-14.4344	-6.8019
2009	44	'Images\spider32.tif'	Threat	1	4	-3	3	-3.92914	3.70341
2009	45	'Images\snake26.tif'	Threat	5	4	-2	2	-0.670761	7.84964
2009	46	'Images\snake57.tif'	Threat	5	3	-3	3	18.1432	25.7757
2009	47	'Images\Foveating (1).tif'	Control	1	1	1	1	-15.4835	-6.07526
2009	48	'Images\Trypophobic13.tif'	Holes	5	7	-2	2	-29.2013	-20.6809
2009	49	'Images\spider8.tif'	Threat	3	7	-2	2	-11.355	-2.83463
2009	50	'Images\spider42.tif'	Threat	4	6	-3	3	-2.87175	4.76079
2009	51	'Images\spider1.tif'	Threat	4	1	-2	2	21.2163	29.7367
2009	52	'Images\Trypophobic7.tif'	Holes	4	2	-3	3	-20.4222	-12.7896
2009	53	'Images\spider29.tif'	Threat	1	7	-3	3	21.7042	29.3367
2009	54	'Images\Foveating (14).tif'	Control	1	1	0	0	-20.4145	-10.1184
2009	55	'Images\Foveating (5).tif'	Control	1	1	0	0	6.96242	17.2585
2009	56	'Images\Trypophobic4.tif'	Holes	1	1	0	0	-22.9925	-12.6964
2009	57	'Images\Trypophobic19.tif'	Holes	1	3	-2	2	-10.1988	-1.67844
2009	58	'Images\snake40.tif'	Threat	2	1	0	0	-16.2891	-5.99298
2009	59	'Images\Trypophobic11.tif'	Holes	1	1	0	0	-9.51763	0.77848
2009	60	'Images\Foveating (18).tif'	Control	1	1	3	3	21.6736	29.3062
2011	1	'Images\spider42.tif'	Threat	6	6	-1	1	-25.0831	-15.6748
2011	2	'Images\Trypophobic11.tif'	Holes	1	1	0	0	-12.6205	-2.32442
2011	3	'Images\Trypophobic7.tif'	Holes	1	3	0	0	-47.1707	-36.8746
2011	4	'Images\Foveating (7).tif'	Control	1	1	0	0	-39.8924	-29.5963
2011	5	'Images\Trypophobic5.tif'	Holes	1	2	0	0	-24.0672	-13.7711
2011	6	'Images\snake22.tif'	Threat	5	5	-1	1	42.7909	52.1992
2011	7	'Images\spider22.tif'	Threat	7	7	-2	2	-18.6702	-10.1498
2011	8	'Images\Trypophobic10.tif'	Holes	4	4	0	0	-53.6747	-43.3786
2011	9	'Images\Trypophobic15.tif'	Holes	1	1	0	0	17.0237	27.3198
2011	10	'Images\Foveating (10).tif'	Control	1	1	0	0	-35.8467	-25.5505
2011	11	'Images\Trypophobic17.tif'	Holes	2	3	-1	1	-25.0696	-15.6613
2011	12	'Images\Foveating (18).tif'	Control	1	1	0	0	21.7859	32.082
2011	13	'Images\Foveating (8).tif'	Control	1	1	0	0	-2.43304	7.86308
2011	14	'Images\Foveating (13).tif'	Control	1	1	0	0	-17.106	-6.80986
2011	15	'Images\Foveating (12).tif'	Control	1	1	0	0	-6.74183	3.55428
2011	16	'Images\snake4.tif'	Threat	4	3	-1	1	-12.2312	-2.82292
2011	17	'Images\Trypophobic14.tif'	Holes	2	2	0	0	-48.0084	-37.7123
2011	18	'Images\Foveating (20).tif'	Control	1	1	0	0	-2.99886	7.29725
2011	19	'Images\Trypophobic3.tif'	Holes	2	2	0	0	-32.402	-22.1058
2011	20	'Images\Trypophobic2.tif'	Holes	1	1	0	0	-43.1531	-32.8569
2011	21	'Images\snake43.tif'	Threat	5	6	-1	1	-39.251	-29.8427
2011	22	'Images\Foveating (19).tif'	Control	1	1	0	0	28.9878	39.2839
2011	23	'Images\spider24.tif'	Threat	6	6	-2	2	-5.65373	2.86667
2011	24	'Images\Foveating (17).tif'	Control	1	1	0	0	-17.8044	-7.5083
2011	25	'Images\spider32.tif'	Threat	6	7	-2	2	-40.3845	-31.8641
2011	26	'Images\Trypophobic8.tif'	Holes	2	2	0	0	5.72793	16.024
2011	27	'Images\Trypophobic9.tif'	Holes	2	2	0	0	-28.7525	-18.4564
2011	28	'Images\Foveating (4).tif'	Control	1	1	0	0	9.44027	19.7364
2011	29	'Images\Trypophobic13.tif'	Holes	2	3	0	0	23.6178	33.9139
2011	30	'Images\Foveating (11).tif'	Control	1	1	0	0	42.1591	52.4552
2011	31	'Images\Trypophobic18.tif'	Holes	3	3	0	0	-18.5074	-8.21129
2011	32	'Images\Foveating (9).tif'	Control	1	1	0	0	8.31663	18.6127
2011	33	'Images\spider55.tif'	Threat	6	6	-2	2	-18.7522	-10.2318
2011	34	'Images\Trypophobic12.tif'	Holes	1	1	0	0	-13.9198	-3.62368
2011	35	'Images\snake41.tif'	Threat	3	5	0	0	-20.1361	-9.83997
2011	36	'Images\Trypophobic19.tif'	Holes	3	3	0	0	-9.69437	0.60174
2011	37	'Images\Trypophobic4.tif'	Holes	2	5	0	0	1.8093	12.1054
2011	38	'Images\snake40.tif'	Threat	5	6	-1	1
2011	39	'Images\Trypophobic6.tif'	Holes	1	1	0	0	-20.7239	-10.4278
2011	40	'Images\Foveating (6).tif'	Control	1	1	0	0	-19.3022	-9.00608
2011	41	'Images\spider8.tif'	Threat	6	6	-2	2	-30.1469	-21.6265
2011	42	'Images\spider14.tif'	Threat	6	6	-1	1	31.4541	40.8624
2011	43	'Images\Foveating (2).tif'	Control	1	1	0	0	-15.9804	-5.68426
2011	44	'Images\Trypophobic20.tif'	Holes	2	2	0	0	14.1892	24.4853
2011	45	'Images\snake25.tif'	Threat	5	5	-1	1	-10.1089	-0.70066
2011	46	'Images\Foveating (3).tif'	Control	1	1	1	1	45.4919	54.9002
2011	47	'Images\Foveating (14).tif'	Control	1	1	0	0	11.204	21.5001
2011	48	'Images\snake32.tif'	Threat	6	6	-2	2	-13.6626	-5.1422
2011	49	'Images\spider21.tif'	Threat	6	6	-2	2	-6.83043	1.68997
2011	50	'Images\Trypophobic16.tif'	Holes	2	2	0	0	6.09876	16.3949
2011	51	'Images\Foveating (1).tif'	Control	1	1	0	0	7.19635	17.4925
2011	52	'Images\Foveating (5).tif'	Control	1	1	0	0	-27.7293	-17.4332
2011	53	'Images\Foveating (15).tif'	Control	1	1	0	0
2011	54	'Images\Foveating (16).tif'	Control	1	1	0	0	-6.75293	3.54318
2011	55	'Images\spider29.tif'	Threat	6	6	-2	2
2011	56	'Images\snake57.tif'	Threat	5	6	0	0	20.4794	30.7755
2011	57	'Images\snake26.tif'	Threat	5	5	-1	1	-20.5984	-11.1901
2011	58	'Images\snake28.tif'	Threat	6	6	0	0	9.01342	19.3095
2011	59	'Images\spider1.tif'	Threat	5	6	-2	2
2011	60	'Images\Trypophobic1.tif'	Holes	3	3	0	0	-13.4398	-3.14373
2012	1	'Images\spider14.tif'	Threat	5	2	-2	2	-19.9427	-11.4223
2012	2	'Images\Foveating (17).tif'	Control	1	1	1	1	-10.2829	-0.87461
2012	3	'Images\Trypophobic6.tif'	Holes	1	1	-1	1	-0.33373	9.07453
2012	4	'Images\spider42.tif'	Threat	3	2	-2	2	-6.45216	2.06824
2012	5	'Images\snake4.tif'	Threat	4	2	-1	1	-4.66133	4.74693
2012	6	'Images\Trypophobic7.tif'	Holes	1	1	0	0	1.34352	11.6396
2012	7	'Images\Foveating (20).tif'	Control	1	1	-1	1	0.0338254	9.44208
2012	8	'Images\Trypophobic17.tif'	Holes	1	2	-1	1	-8.87925	0.52901
2012	9	'Images\Foveating (2).tif'	Control	1	1	-1	1	-7.72262	1.68564
2012	10	'Images\spider29.tif'	Threat	3	2	-2	2	5.94555	14.4659
2012	11	'Images\Trypophobic1.tif'	Holes	2	1	-1	1	-15.4987	-6.09045
2012	12	'Images\Trypophobic10.tif'	Holes	2	2	-1	1	-6.26689	3.14137
2012	13	'Images\Foveating (7).tif'	Control	1	1	1	1	9.06162	18.4699
2012	14	'Images\Foveating (4).tif'	Control	2	1	-1	1	-10.8132	-1.40498
2012	15	'Images\Foveating (19).tif'	Control	1	1	-1	1	11.4475	20.8558
2012	16	'Images\Foveating (14).tif'	Control	1	1	0	0	2.68743	12.9835
2012	17	'Images\Foveating (3).tif'	Control	1	1	1	1	-1.20394	8.20432
2012	18	'Images\snake25.tif'	Threat	4	1	-2	2	-2.7426	5.7778
2012	19	'Images\spider21.tif'	Threat	2	2	-2	2	-12.6307	-4.11029
2012	20	'Images\spider22.tif'	Threat	4	2	-2	2	1.03073	9.55113
2012	21	'Images\Trypophobic19.tif'	Holes	1	1	-1	1	2.88896	12.2972
2012	22	'Images\Foveating (6).tif'	Control	1	1	1	1	-15.1239	-5.71567
2012	23	'Images\Trypophobic12.tif'	Holes	1	1	2	2	0.511525	9.03193
2012	24	'Images\Foveating (8).tif'	Control	1	1	0	0	11.3381	21.6342
2012	25	'Images\Foveating (16).tif'	Control	1	1	0	0	-17.631	-7.33487
2012	26	'Images\Foveating (18).tif'	Control	1	1	-1	1	-1.70361	7.70464
2012	27	'Images\Foveating (9).tif'	Control	1	1	-1	1	29.9285	39.3368
2012	28	'Images\spider24.tif'	Threat	4	2	-2	2	34.7562	43.2766
2012	29	'Images\Trypophobic5.tif'	Holes	1	1	3	3	-10.037	-2.4045
2012	30	'Images\spider32.tif'	Threat	2	2	-1	1	-3.82362	5.58464
2012	31	'Images\spider1.tif'	Threat	4	2	-2	2	13.1383	21.6587
2012	32	'Images\Trypophobic3.tif'	Holes	2	2	-1	1	4.56323	13.9715
2012	33	'Images\Trypophobic13.tif'	Holes	2	1	1	1	-7.69231	1.71595
2012	34	'Images\snake43.tif'	Threat	2	1	-1	1	8.71781	18.1261
2012	35	'Images\snake22.tif'	Threat	2	2	-1	1	10.7002	20.1084
2012	36	'Images\Foveating (10).tif'	Control	1	1	0	0	-2.79045	7.50566
2012	37	'Images\Foveating (1).tif'	Control	1	1	-1	1	2.09014	11.4984
2012	38	'Images\Foveating (13).tif'	Control	1	1	-1	1	-3.73206	5.6762
2012	39	'Images\Trypophobic2.tif'	Holes	1	1	1	1	6.72347	16.1317
2012	40	'Images\Foveating (12).tif'	Control	1	1	-1	1	-0.930401	8.47786
2012	41	'Images\Trypophobic14.tif'	Holes	1	1	-1	1	13.6089	23.0172
2012	42	'Images\Foveating (5).tif'	Control	1	1	-1	1	37.3719	46.7801
2012	43	'Images\Trypophobic11.tif'	Holes	1	1	-1	1	14.1894	23.5977
2012	44	'Images\Trypophobic20.tif'	Holes	1	1	0	0	-16.3805	-6.08441
2012	45	'Images\snake57.tif'	Threat	3	1	-1	1	-2.84639	6.56187
2012	46	'Images\Foveating (15).tif'	Control	1	1	-1	1	-6.83067	2.57759
2012	47	'Images\Foveating (11).tif'	Control	1	1	1	1	3.86375	13.272
2012	48	'Images\spider55.tif'	Threat	3	2	-2	2	25.7553	34.2757
2012	49	'Images\Trypophobic4.tif'	Holes	3	1	-1	1	-3.97846	5.4298
2012	50	'Images\snake28.tif'	Threat	3	1	-1	1	7.57001	16.9783
2012	51	'Images\snake40.tif'	Threat	3	1	-2	2	-13.4718	-4.95143
2012	52	'Images\spider8.tif'	Threat	3	2	-1	1	-1.74158	7.66668
2012	53	'Images\snake41.tif'	Threat	5	2	1	1	6.12556	15.5338
2012	54	'Images\snake32.tif'	Threat	4	1	-1	1	8.38777	17.796
2012	55	'Images\Trypophobic8.tif'	Holes	1	1	0	0	7.42558	17.7217
2012	56	'Images\Trypophobic9.tif'	Holes	1	1	-1	1	-22.1989	-12.7906
2012	57	'Images\Trypophobic15.tif'	Holes	1	1	0	0	-4.36323	5.93288
2012	58	'Images\Trypophobic16.tif'	Holes	1	1	0	0	-0.707361	9.58875
2012	59	'Images\snake26.tif'	Threat	4	2	-2	2	-5.53545	2.98495
2012	60	'Images\Trypophobic18.tif'	Holes	1	1	-1	1	14.5449	23.9532
2013	1	'Images\Trypophobic11.tif'	Holes	1	1	0	0	-31.1255	-20.8294
2013	2	'Images\Foveating (13).tif'	Control	1	1	0	0	-31.4871	-21.191
2013	3	'Images\snake4.tif'	Threat	4	3	-3	3	-23.1943	-15.5617
2013	4	'Images\Foveating (15).tif'	Control	1	1	0	0	-31.4689	-21.1727
2013	5	'Images\spider21.tif'	Threat	2	2	-1	1	-37.0027	-27.5945
2013	6	'Images\spider32.tif'	Threat	2	2	-1	1	-21.4395	-12.0313
2013	7	'Images\Trypophobic20.tif'	Holes	1	1	0	0	-25.3301	-15.034
2013	8	'Images\Trypophobic19.tif'	Holes	1	1	0	0	-19.6748	-9.37871
2013	9	'Images\spider8.tif'	Threat	2	3	-1	1	-4.32568	5.08258
2013	10	'Images\snake22.tif'	Threat	1	1	0	0	-15.7597	-5.46355
2013	11	'Images\Foveating (6).tif'	Control	1	1	0	0	-23.9201	-13.624
2013	12	'Images\Foveating (4).tif'	Control	1	1	0	0	-1.88469	8.41142
2013	13	'Images\Trypophobic1.tif'	Holes	1	1	0	0	-11.2226	-0.92646
2013	14	'Images\Trypophobic5.tif'	Holes	1	1	0	0	-22.3356	-12.0395
2013	15	'Images\spider29.tif'	Threat	2	3	-1	1	8.80421	18.2125
2013	16	'Images\Foveating (8).tif'	Control	1	1	0	0	-13.8409	-3.54477
2013	17	'Images\Foveating (5).tif'	Control	1	1	0	0	-15.6291	-5.33302
2013	18	'Images\snake57.tif'	Threat	2	1	-1	1	-22.8831	-13.4749
2013	19	'Images\spider24.tif'	Threat	2	1	-1	1	11.2586	20.6669
2013	20	'Images\Trypophobic6.tif'	Holes	1	2	-1	1	-12.785	-3.37672
2013	21	'Images\Foveating (3).tif'	Control	1	1	0	0	-21.3456	-11.0495
2013	22	'Images\Trypophobic7.tif'	Holes	1	1	0	0	-15.7053	-5.40915
2013	23	'Images\spider42.tif'	Threat	2	3	-1	1	-0.86605	8.54221
2013	24	'Images\Foveating (16).tif'	Control	1	1	0	0	-24.0812	-13.7851
2013	25	'Images\Foveating (14).tif'	Control	1	1	0	0	-40.0909	-29.7948
2013	26	'Images\Foveating (2).tif'	Control	1	1	0	0	-28.9329	-18.6368
2013	27	'Images\Trypophobic9.tif'	Holes	1	1	0	0	-33.9919	-23.6958
2013	28	'Images\snake25.tif'	Threat	4	2	-3	3	-16.7464	-9.11381
2013	29	'Images\Trypophobic13.tif'	Holes	1	1	0	0	-20.742	-10.4459
2013	30	'Images\Trypophobic16.tif'	Holes	1	2	0	0	39.0352	49.3313
2013	31	'Images\Trypophobic15.tif'	Holes	1	2	-1	1	-30.401	-20.9927
2013	32	'Images\Foveating (7).tif'	Control	1	1	0	0	19.7512	30.0473
2013	33	'Images\Trypophobic4.tif'	Holes	1	1	-1	1	-12.2026	-2.79433
2013	34	'Images\spider22.tif'	Threat	2	3	-1	1	-7.28944	2.11882
2013	35	'Images\Foveating (10).tif'	Control	1	1	0	0	-3.82928	6.46683
2013	36	'Images\snake41.tif'	Threat	2	1	-1	1	10.9657	20.374
2013	37	'Images\Foveating (20).tif'	Control	1	1	0	0	8.82469	19.1208
2013	38	'Images\Trypophobic2.tif'	Holes	1	1	0	0	-40.7851	-30.489
2013	39	'Images\snake28.tif'	Threat	2	1	-1	1	-6.3969	3.01136
2013	40	'Images\Trypophobic17.tif'	Holes	1	1	0	0	-32.0781	-21.7819
2013	41	'Images\spider1.tif'	Threat	3	2	-1	1	14.2703	23.6785
2013	42	'Images\Foveating (12).tif'	Control	1	1	-3	3	-12.3267	-4.69411
2013	43	'Images\Trypophobic18.tif'	Holes	1	2	-1	1	-35.4176	-26.0093
2013	44	'Images\Foveating (19).tif'	Control	1	1	0	0	-46.7391	-36.443
2013	45	'Images\Foveating (9).tif'	Control	1	1	0	0	78.9761	89.2722
2013	46	'Images\snake43.tif'	Threat	3	2	-2	2	77.3535	85.8739
2013	47	'Images\Foveating (18).tif'	Control	1	1	0	0	-34.5758	-24.2797
2013	48	'Images\Foveating (11).tif'	Control	1	1	0	0	-16.2415	-5.94543
2013	49	'Images\snake26.tif'	Threat	4	4	-3	3	11.1181	18.7507
2013	50	'Images\Foveating (1).tif'	Control	1	1	-3	3	25.0461	32.6786
2013	51	'Images\spider55.tif'	Threat	2	3	-1	1	9.71078	19.119
2013	52	'Images\snake40.tif'	Threat	3	2	-2	2	-18.2183	-9.6979
2013	53	'Images\spider14.tif'	Threat	3	2	-1	1	-29.9026	-20.4943
2013	54	'Images\Trypophobic12.tif'	Holes	1	1	0	0	-54.0444	-43.7483
2013	55	'Images\Trypophobic8.tif'	Holes	1	2	0	0	-45.5672	-35.2711
2013	56	'Images\Trypophobic3.tif'	Holes	1	1	0	0	18.042	28.3382
2013	57	'Images\snake32.tif'	Threat	4	1	-1	1	-39.0021	-29.5939
2013	58	'Images\Trypophobic14.tif'	Holes	1	1	0	0	-31.801	-21.5049
2013	59	'Images\Foveating (17).tif'	Control	1	1	0	0	-14.4073	-4.11121
2013	60	'Images\Trypophobic10.tif'	Holes	1	1	0	0	37.5757	47.8718
2014	1	'Images\Trypophobic17.tif'	Holes	1	3	-1	1	-51.9748	-42.5666
2014	2	'Images\Trypophobic9.tif'	Holes	2	2	0	0	-30.4022	-20.1061
2014	3	'Images\Foveating (19).tif'	Control	1	1	0	0	-16.002	-5.70592
2014	4	'Images\spider32.tif'	Threat	3	2	-1	1	-29.3186	-19.9104
2014	5	'Images\Trypophobic2.tif'	Holes	2	2	0	0	-45.0991	-34.803
2014	6	'Images\Foveating (15).tif'	Control	2	2	0	0	-9.47275	0.82336
2014	7	'Images\Foveating (9).tif'	Control	1	1	0	0	-5.73647	4.55964
2014	8	'Images\Trypophobic8.tif'	Holes	2	2	0	0	-24.1092	-13.8131
2014	9	'Images\spider21.tif'	Threat	2	2	-1	1	-30.8848	-21.4766
2014	10	'Images\Trypophobic7.tif'	Holes	2	1	0	0	-31.1303	-20.8342
2014	11	'Images\Foveating (8).tif'	Control	1	1	0	0	-38.0421	-27.746
2014	12	'Images\spider8.tif'	Threat	2	2	-2	2	-11.5168	-2.99643
2014	13	'Images\Trypophobic20.tif'	Holes	1	1	0	0	-30.0352	-19.739
2014	14	'Images\Foveating (12).tif'	Control	1	2	0	0	-28.9961	-18.7
2014	15	'Images\Trypophobic5.tif'	Holes	1	1	1	1	-8.74554	0.66272
2014	16	'Images\Foveating (4).tif'	Control	1	1	0	0	-37.0303	-26.7341
2014	17	'Images\Trypophobic4.tif'	Holes	3	3	-2	2	-17.0892	-8.56879
2014	18	'Images\Trypophobic19.tif'	Holes	1	2	0	0	-27.8547	-17.5586
2014	19	'Images\Foveating (18).tif'	Control	2	2	0	0	-18.2709	-7.97474
2014	20	'Images\Trypophobic10.tif'	Holes	2	2	0	0	4.47637	14.7725
2014	21	'Images\Trypophobic12.tif'	Holes	1	1	1	1	-28.0611	-18.6528
2014	22	'Images\snake26.tif'	Threat	2	2	0	0	-7.28179	3.01433
2014	23	'Images\spider24.tif'	Threat	3	2	0	0	12.4916	22.7877
2014	24	'Images\Trypophobic16.tif'	Holes	2	2	0	0	-20.9406	-10.6445
2014	25	'Images\Trypophobic6.tif'	Holes	2	2	0	0	-22.0964	-11.8003
2014	26	'Images\Trypophobic13.tif'	Holes	2	1	-1	1	-16.8857	-7.47747
2014	27	'Images\Foveating (3).tif'	Control	2	2	0	0	-4.25691	6.0392
2014	28	'Images\snake32.tif'	Threat	2	2	0	0	-10.3157	-0.01962
2014	29	'Images\Foveating (5).tif'	Control	1	1	0	0	0.150753	10.4469
2014	30	'Images\snake41.tif'	Threat	2	2	0	0	-28.8721	-18.5759
2014	31	'Images\spider55.tif'	Threat	2	2	0	0	10.34	20.6361
2014	32	'Images\Trypophobic3.tif'	Holes	1	1	0	0	-30.8556	-20.5595
2014	33	'Images\Trypophobic11.tif'	Holes	1	4	-1	1	-41.817	-32.4088
2014	34	'Images\snake28.tif'	Threat	2	2	-1	1	-14.9015	-5.49328
2014	35	'Images\snake40.tif'	Threat	2	2	0	0	-17.586	-7.28987
2014	36	'Images\Foveating (2).tif'	Control	2	2	0	0	12.5036	22.7997
2014	37	'Images\Trypophobic14.tif'	Holes	2	2	0	0	-10.2393	0.05685
2014	38	'Images\snake22.tif'	Threat	2	2	0	0	-4.85717	5.43894
2014	39	'Images\Foveating (13).tif'	Control	1	1	0	0	-10.721	-0.42491
2014	40	'Images\Foveating (14).tif'	Control	3	4	0	0	-14.5974	-4.3013
2014	41	'Images\Foveating (7).tif'	Control	1	1	1	1	-24.7785	-15.3702
2014	42	'Images\spider29.tif'	Threat	2	2	0	0	-15.7389	-5.44283
2014	43	'Images\Foveating (20).tif'	Control	2	2	0	0	-30.9407	-20.6446
2014	44	'Images\Foveating (16).tif'	Control	1	1	0	0	-15.4596	-5.16346
2014	45	'Images\Foveating (11).tif'	Control	1	1	0	0	15.1683	25.4645
2014	46	'Images\spider42.tif'	Threat	3	3	-1	1	-20.1891	-10.7808
2014	47	'Images\snake57.tif'	Threat	2	2	0	0	9.84482	20.1409
2014	48	'Images\Foveating (1).tif'	Control	1	1	0	0	-0.691026	9.60509
2014	49	'Images\Trypophobic18.tif'	Holes	2	2	0	0	0.898715	11.1948
2014	50	'Images\Foveating (17).tif'	Control	3	2	-1	1	1.29947	10.7077
2014	51	'Images\spider1.tif'	Threat	2	1	0	0	-10.782	-0.48591
2014	52	'Images\snake25.tif'	Threat	2	2	-1	1	-28.0892	-18.6809
2014	53	'Images\spider14.tif'	Threat	2	3	-1	1	-21.0216	-11.6133
2014	54	'Images\snake43.tif'	Threat	2	2	-1	1	-18.9058	-9.49757
2014	55	'Images\spider22.tif'	Threat	2	2	-1	1	-17.1258	-7.71754
2014	56	'Images\Trypophobic15.tif'	Holes	7	7	-2	2	-24.3368	-15.8164
2014	57	'Images\Foveating (6).tif'	Control	1	1	0	0	-26.2129	-15.9168
2014	58	'Images\Foveating (10).tif'	Control	1	1	0	0	-19.7211	-9.42501
2014	59	'Images\snake4.tif'	Threat	2	2	0	0	-21.0642	-10.7681
2014	60	'Images\Trypophobic1.tif'	Holes	2	3	-1	1	16.5949	26.0031
2015	1	'Images\snake4.tif'	Threat	6	5	-2	2	-10.2822	-1.76182
2015	2	'Images\Trypophobic8.tif'	Holes	3	3	-1	1	-9.93035	-0.5221
2015	3	'Images\snake40.tif'	Threat	5	5	-2	2	17.4148	25.9352
2015	4	'Images\Trypophobic6.tif'	Holes	5	5	-1	1	-23.8546	-14.4464
2015	5	'Images\Foveating (2).tif'	Control	1	1	0	0	7.10854	17.4047
2015	6	'Images\Trypophobic18.tif'	Holes	4	4	-2	2	8.50999	17.0304
2015	7	'Images\Trypophobic11.tif'	Holes	1	1	0	0	0.953198	11.2493
2015	8	'Images\Trypophobic14.tif'	Holes	2	3	-1	1	-19.7376	-10.3293
2015	9	'Images\Trypophobic9.tif'	Holes	3	3	-1	1	-8.0475	1.36076
2015	10	'Images\Trypophobic2.tif'	Holes	2	2	-1	1	-20.4109	-11.0026
2015	11	'Images\snake57.tif'	Threat	6	6	-3	3	23.3438	30.9763
2015	12	'Images\Foveating (15).tif'	Control	1	1	0	0	-17.8962	-7.60006
2015	13	'Images\Foveating (7).tif'	Control	1	1	0	0	22.5475	32.8437
2015	14	'Images\snake26.tif'	Threat	5	5	-2	2	-33.1812	-24.6608
2015	15	'Images\Foveating (18).tif'	Control	4	2	-1	1	10.1588	19.567
2015	16	'Images\Foveating (6).tif'	Control	1	1	0	0	-8.43323	1.86288
2015	17	'Images\Foveating (4).tif'	Control	1	1	0	0	-24.4494	-14.1533
2015	18	'Images\snake28.tif'	Threat	7	5	-2	2	-13.5667	-5.04627
2015	19	'Images\Trypophobic5.tif'	Holes	4	4	-1	1	-11.45	-2.04178
2015	20	'Images\spider29.tif'	Threat	7	7	-3	3	26.7095	34.3421
2015	21	'Images\Foveating (13).tif'	Control	1	1	0	0	-28.3423	-18.0461
2015	22	'Images\Trypophobic3.tif'	Holes	1	1	-2	2	-17.0748	-8.55436
2015	23	'Images\snake25.tif'	Threat	4	4	-1	1	-9.04536	0.3629
2015	24	'Images\Trypophobic10.tif'	Holes	1	1	0	0	12.4227	22.7188
2015	25	'Images\Foveating (19).tif'	Control	1	1	0	0	-5.36209	4.93402
2015	26	'Images\snake22.tif'	Threat	5	5	-2	2	19.6892	28.2096
2015	27	'Images\Foveating (10).tif'	Control	1	1	0	0	3.34686	13.643
2015	28	'Images\Foveating (12).tif'	Control	1	1	1	1	-43.1931	-33.7848
2015	29	'Images\spider24.tif'	Threat	7	7	-3	3	81.7983	89.4308
2015	30	'Images\Trypophobic20.tif'	Holes	3	3	-1	1	-21.7245	-12.3163
2015	31	'Images\Trypophobic17.tif'	Holes	6	3	-2	2	-37.5154	-28.995
2015	32	'Images\Trypophobic4.tif'	Holes	1	3	0	0	-12.9661	-2.66996
2015	33	'Images\Foveating (3).tif'	Control	1	1	0	0	9.35353	19.6497
2015	34	'Images\spider21.tif'	Threat	6	7	-3	3	22.4543	30.0869
2015	35	'Images\spider32.tif'	Threat	6	6	-3	3	14.365	21.9976
2015	36	'Images\spider22.tif'	Threat	7	7	-3	3	25.5642	33.1968
2015	37	'Images\spider55.tif'	Threat	6	6	-3	3	27.7284	35.361
2015	38	'Images\Trypophobic13.tif'	Holes	4	4	-2	2	2.11568	10.6361
2015	39	'Images\Trypophobic12.tif'	Holes	1	1	0	0	17.0699	27.3661
2015	40	'Images\Foveating (8).tif'	Control	1	1	0	0	-0.800492	9.49562
2015	41	'Images\spider1.tif'	Threat	7	7	-3	3	11.3151	18.9476
2015	42	'Images\Foveating (14).tif'	Control	1	1	0	0	-14.9494	-4.65327
2015	43	'Images\Foveating (5).tif'	Control	1	1	0	0	-14.3792	-4.0831
2015	44	'Images\snake41.tif'	Threat	2	3	-1	1	-28.2476	-18.8393
2015	45	'Images\snake43.tif'	Threat	4	4	-1	1	-37.4368	-28.0285
2015	46	'Images\Trypophobic1.tif'	Holes	1	1	0	0	-2.12109	8.17503
2015	47	'Images\Trypophobic7.tif'	Holes	2	2	-1	1	21.5292	30.9375
2015	48	'Images\Foveating (11).tif'	Control	1	1	1	1	-14.5596	-5.15129
2015	49	'Images\Trypophobic15.tif'	Holes	4	4	-2	2	-21.0894	-12.569
2015	50	'Images\snake32.tif'	Threat	4	4	-2	2	-34.2149	-25.6945
2015	51	'Images\Trypophobic16.tif'	Holes	3	5	-1	1	3.01338	12.4216
2015	52	'Images\spider8.tif'	Threat	7	6	-3	3	18.5815	26.214
2015	53	'Images\Foveating (20).tif'	Control	1	1	0	0	-17.6755	-7.3794
2015	54	'Images\Foveating (17).tif'	Control	1	1	0	0	-43.82	-33.5239
2015	55	'Images\spider42.tif'	Threat	6	6	-3	3	17.1843	24.8168
2015	56	'Images\spider14.tif'	Threat	7	7	-3	3	11.2211	18.8536
2015	57	'Images\Trypophobic19.tif'	Holes	3	2	-2	2	-43.5737	-35.0533
2015	58	'Images\Foveating (1).tif'	Control	1	1	0	0	28.3172	38.6133
2015	59	'Images\Foveating (9).tif'	Control	1	1	1	1	-31.8909	-22.4826
2015	60	'Images\Foveating (16).tif'	Control	1	1	0	0	20.958	31.2541
2016	1	'Images\snake57.tif'	Threat	1	1	0	0	-17.9057	-7.60956
2016	2	'Images\snake4.tif'	Threat	1	1	0	0	-37.4388	-27.1427
2016	3	'Images\spider55.tif'	Threat	2	2	-2	2	14.4911	23.0114
2016	4	'Images\snake26.tif'	Threat	1	1	0	0	-46.579	-36.2829
2016	5	'Images\Trypophobic13.tif'	Holes	1	1	1	1	8.07544	17.4837
2016	6	'Images\Trypophobic4.tif'	Holes	1	1	1	1	-21.6701	-12.2618
2016	7	'Images\Trypophobic14.tif'	Holes	1	1	0	0	-16.0074	-5.71131
2016	8	'Images\spider21.tif'	Threat	2	2	-2	2	-12.1404	-3.61997
2016	9	'Images\Trypophobic20.tif'	Holes	1	1	1	1	-50.112	-40.7037
2016	10	'Images\spider24.tif'	Threat	2	2	-2	2	12.4157	20.9361
2016	11	'Images\Foveating (5).tif'	Control	1	1	3	3	-7.9605	-0.32795
2016	12	'Images\spider32.tif'	Threat	1	2	-1	1	1.66795	11.0762
2016	13	'Images\snake22.tif'	Threat	1	1	0	0	25.9519	36.248
2016	14	'Images\snake43.tif'	Threat	1	1	0	0	-39.2369	-28.9408
2016	15	'Images\Foveating (10).tif'	Control	1	1	1	1	-10.6026	-1.19439
2016	16	'Images\Foveating (3).tif'	Control	1	1	0	0	23.2738	33.5699
2016	17	'Images\Foveating (8).tif'	Control	1	1	2	2	-28.3872	-19.8668
2016	18	'Images\spider14.tif'	Threat	2	2	-1	1	-3.81898	5.58928
2016	19	'Images\Trypophobic5.tif'	Holes	1	1	2	2	-19.9597	-11.4393
2016	20	'Images\Trypophobic18.tif'	Holes	1	1	1	1	18.7233	28.1316
2016	21	'Images\snake41.tif'	Threat	1	1	0	0	-15.7624	-5.46628
2016	22	'Images\Foveating (6).tif'	Control	1	1	3	3	44.4103	52.0428
2016	23	'Images\spider42.tif'	Threat	2	2	-2	2	50.091	58.6114
2016	24	'Images\Foveating (2).tif'	Control	1	1	3	3	-41.3483	-33.7157
2016	25	'Images\Trypophobic2.tif'	Holes	1	1	2	2	17.2609	25.7813
2016	26	'Images\Trypophobic16.tif'	Holes	1	1	1	1	-14.412	-5.00378
2016	27	'Images\spider29.tif'	Threat	1	2	-1	1	33.6975	43.1058
2016	28	'Images\Foveating (15).tif'	Control	1	1	0	0	-26.7054	-16.4093
2016	29	'Images\Foveating (17).tif'	Control	1	1	0	0	-38.9107	-28.6146
2016	30	'Images\spider1.tif'	Threat	2	2	-2	2	41.6935	50.2139
2016	31	'Images\Trypophobic12.tif'	Holes	1	1	1	1	-32.4666	-23.0584
2016	32	'Images\snake32.tif'	Threat	1	1	0	0	-0.115985	10.1801
2016	33	'Images\snake25.tif'	Threat	1	1	0	0	-38.3294	-28.0333
2016	34	'Images\Foveating (1).tif'	Control	1	1	0	0	-46.5232	-36.2271
2016	35	'Images\Foveating (14).tif'	Control	1	1	2	2	-0.673805	7.8466
2016	36	'Images\Foveating (18).tif'	Control	1	1	1	1	-31.9535	-22.5452
2016	37	'Images\snake40.tif'	Threat	1	1	0	0	-30.4351	-20.139
2016	38	'Images\Trypophobic8.tif'	Holes	1	1	0	0	-32.276	-21.9799
2016	39	'Images\Trypophobic10.tif'	Holes	1	1	0	0	-15.8266	-5.53052
2016	40	'Images\Trypophobic3.tif'	Holes	1	1	3	3	-10.894	-3.26143
2016	41	'Images\Foveating (11).tif'	Control	1	1	1	1	-3.7488	5.65946
2016	42	'Images\Foveating (13).tif'	Control	1	1	1	1	-28.1485	-18.7403
2016	43	'Images\Foveating (9).tif'	Control	1	1	2	2	-25.0996	-16.5792
2016	44	'Images\Foveating (20).tif'	Control	1	1	3	3	-17.8412	-10.2086
2016	45	'Images\Trypophobic1.tif'	Holes	1	1	0	0	54.9374	65.2336
2016	46	'Images\Foveating (16).tif'	Control	1	1	1	1	-58.1759	-48.7677
2016	47	'Images\Trypophobic7.tif'	Holes	1	1	0	0	4.9499	15.246
2016	48	'Images\snake28.tif'	Threat	1	1	0	0	55.5792	65.8754
2016	49	'Images\Trypophobic6.tif'	Holes	1	1	0	0	-46.6577	-36.3615
2016	50	'Images\Foveating (19).tif'	Control	1	1	0	0	60.8942	71.1903
2016	51	'Images\Trypophobic17.tif'	Holes	1	1	0	0	-43.3963	-33.1002
2016	52	'Images\spider8.tif'	Threat	2	2	-2	2	-22.8131	-14.2927
2016	53	'Images\Trypophobic19.tif'	Holes	1	1	1	1	62.1948	71.6031
2016	54	'Images\Trypophobic11.tif'	Holes	1	1	1	1	14.709	24.1172
2016	55	'Images\Foveating (12).tif'	Control	1	1	2	2	-19.6079	-11.0875
2016	56	'Images\Foveating (7).tif'	Control	1	1	2	2	0.382449	8.90285
2016	57	'Images\Foveating (4).tif'	Control	1	1	1	1	-35.3069	-25.8987
2016	58	'Images\spider22.tif'	Threat	1	1	-1	1	66.4871	75.8953
2016	59	'Images\Trypophobic15.tif'	Holes	1	1	1	1	-56.8104	-47.4022
2016	60	'Images\Trypophobic9.tif'	Holes	1	1	0	0	-6.44697	3.84915
2017	1	'Images\Foveating (5).tif'	Control	1	1	0	0	-11.0012	-0.70509
2017	2	'Images\Foveating (16).tif'	Control	1	1	0	0	-13.4948	-3.19874
2017	3	'Images\snake25.tif'	Threat	1	1	0	0	-28.0766	-17.7805
2017	4	'Images\Trypophobic18.tif'	Holes	1	4	-1	1	-26.9692	-17.561
2017	5	'Images\Trypophobic15.tif'	Holes	1	1	0	0	-28.5656	-18.2695
2017	6	'Images\spider1.tif'	Threat	1	1	0	0	-6.80066	3.49545
2017	7	'Images\Foveating (20).tif'	Control	1	1	0	0	-12.9641	-2.66802
2017	8	'Images\snake26.tif'	Threat	1	1	0	0	-26.8159	-16.5197
2017	9	'Images\Foveating (7).tif'	Control	1	1	0	0	-3.05472	7.24139
2017	10	'Images\spider14.tif'	Threat	1	1	0	0	-19.9904	-9.69432
2017	11	'Images\Foveating (9).tif'	Control	1	1	0	0	-23.9375	-13.6414
2017	12	'Images\Foveating (19).tif'	Control	1	1	0	0	15.1767	25.4728
2017	13	'Images\Trypophobic19.tif'	Holes	1	3	-1	1	-27.2209	-17.8127
2017	14	'Images\Foveating (18).tif'	Control	1	1	0	0	-1.09613	9.19998
2017	15	'Images\snake22.tif'	Threat	1	1	0	0	-29.2434	-18.9473
2017	16	'Images\Trypophobic6.tif'	Holes	1	2	-1	1	-32.0587	-22.6505
2017	17	'Images\Foveating (4).tif'	Control	1	1	0	0	-17.1128	-6.81664
2017	18	'Images\Trypophobic17.tif'	Holes	2	2	-2	2	-34.3086	-25.7882
2017	19	'Images\spider22.tif'	Threat	1	1	0	0	19.8907	30.1868
2017	20	'Images\Foveating (3).tif'	Control	1	1	0	0	-2.52192	7.77419
2017	21	'Images\Foveating (10).tif'	Control	1	1	0	0	-13.5145	-3.21839
2017	22	'Images\spider42.tif'	Threat	1	1	0	0	-14.334	-4.03784
2017	23	'Images\Trypophobic20.tif'	Holes	1	1	0	0	-25.2444	-14.9483
2017	24	'Images\Trypophobic2.tif'	Holes	1	1	0	0	-21.4048	-11.1087
2017	25	'Images\Foveating (17).tif'	Control	1	1	0	0	-23.5283	-13.2322
2017	26	'Images\snake28.tif'	Threat	1	1	0	0	-21.1402	-10.8441
2017	27	'Images\Trypophobic12.tif'	Holes	1	1	0	0	-9.58157	0.71454
2017	28	'Images\spider21.tif'	Threat	1	1	0	0	-20.0385	-9.74237
2017	29	'Images\Trypophobic7.tif'	Holes	1	1	0	0	-35.0856	-24.7894
2017	30	'Images\Trypophobic11.tif'	Holes	2	2	0	0	-18.9781	-8.68201
2017	31	'Images\spider32.tif'	Threat	1	1	0	0	-16.6957	-6.39963
2017	32	'Images\Foveating (14).tif'	Control	1	1	0	0	-12.8918	-2.5957
2017	33	'Images\spider8.tif'	Threat	1	1	0	0	-12.1006	-1.80447
2017	34	'Images\Trypophobic16.tif'	Holes	1	1	0	0	-8.86801	1.4281
2017	35	'Images\spider29.tif'	Threat	1	1	0	0	-0.527228	9.76889
2017	36	'Images\Trypophobic13.tif'	Holes	1	1	0	0	0.847597	11.1437
2017	37	'Images\Foveating (6).tif'	Control	1	1	0	0	-14.1828	-3.88666
2017	38	'Images\snake43.tif'	Threat	1	1	0	0	-25.642	-15.3459
2017	39	'Images\Foveating (11).tif'	Control	1	1	0	0	-12.1726	-1.87644
2017	40	'Images\Trypophobic5.tif'	Holes	1	1	-1	1	-32.8473	-23.439
2017	41	'Images\Foveating (8).tif'	Control	1	1	0	0	-15.7325	-5.43635
2017	42	'Images\snake40.tif'	Threat	1	1	0	0	-19.3458	-9.04966
2017	43	'Images\snake32.tif'	Threat	1	1	0	0	-27.0854	-16.7893
2017	44	'Images\Foveating (12).tif'	Control	1	1	0	0	-11.6264	-1.33029
2017	45	'Images\Trypophobic9.tif'	Holes	1	1	0	0	-15.021	-4.72486
2017	46	'Images\Foveating (15).tif'	Control	1	1	0	0	-4.60838	5.68773
2017	47	'Images\spider55.tif'	Threat	1	1	0	0	5.31637	15.6125
2017	48	'Images\Trypophobic4.tif'	Holes	4	5	-3	3	-32.7307	-25.0982
2017	49	'Images\snake57.tif'	Threat	1	1	0	0	-2.01931	8.2768
2017	50	'Images\snake4.tif'	Threat	1	1	0	0	-14.9166	-4.62046
2017	51	'Images\Trypophobic8.tif'	Holes	1	1	0	0	-8.00604	2.29007
2017	52	'Images\Foveating (2).tif'	Control	1	1	0	0	-30.2954	-19.9993
2017	53	'Images\Trypophobic14.tif'	Holes	1	1	0	0	-19.0439	-8.74774
2017	54	'Images\Foveating (13).tif'	Control	1	1	0	0	-24.9027	-14.6066
2017	55	'Images\Trypophobic3.tif'	Holes	1	1	0	0	-12.0514	-1.75526
2017	56	'Images\spider24.tif'	Threat	1	1	0	0	14.1991	24.4952
2017	57	'Images\Trypophobic10.tif'	Holes	1	1	0	0	-33.8092	-23.5131
2017	58	'Images\snake41.tif'	Threat	1	1	0	0	-23.0439	-12.7477
2017	59	'Images\Trypophobic1.tif'	Holes	1	1	0	0	-8.08409	2.21202
2017	60	'Images\Foveating (1).tif'	Control	1	1	0	0	-5.24838	5.04773
2018	1	'Images\Trypophobic4.tif'	Holes	1	3	-1	1	-13.7697	-4.36147
2018	2	'Images\snake57.tif'	Threat	1	1	0	0	-5.80952	4.4866
2018	3	'Images\Trypophobic5.tif'	Holes	1	1	0	0	-6.98009	3.31602
2018	4	'Images\snake43.tif'	Threat	2	1	-1	1	-10.1447	-0.73645
2018	5	'Images\Trypophobic8.tif'	Holes	1	1	0	0	-9.40446	0.89166
2018	6	'Images\Trypophobic6.tif'	Holes	1	2	-1	1	3.45949	12.8677
2018	7	'Images\Trypophobic17.tif'	Holes	1	2	-1	1	-11.9373	-2.52901
2018	8	'Images\snake32.tif'	Threat	2	1	0	0	-8.81904	1.47707
2018	9	'Images\Trypophobic2.tif'	Holes	1	1	2	2	-17.3371	-8.81666
2018	10	'Images\Trypophobic1.tif'	Holes	1	2	0	0	-1.09567	9.20044
2018	11	'Images\Trypophobic15.tif'	Holes	1	2	0	0	-24.8226	-14.5264
2018	12	'Images\Foveating (3).tif'	Control	1	1	1	1	-15.2867	-5.87848
2018	13	'Images\snake25.tif'	Threat	2	1	0	0	-14.0104	-3.71425
2018	14	'Images\spider22.tif'	Threat	2	1	-1	1	35.6988	45.1071
2018	15	'Images\Foveating (7).tif'	Control	1	1	0	0	15.9431	26.2392
2018	16	'Images\Foveating (16).tif'	Control	1	1	1	1	-1.28303	8.12522
2018	17	'Images\Foveating (19).tif'	Control	1	1	1	1	-5.45176	3.9565
2018	18	'Images\snake26.tif'	Threat	2	1	-1	1	-22.9989	-13.5906
2018	19	'Images\snake28.tif'	Threat	2	1	0	0	-9.88013	0.41598
2018	20	'Images\Trypophobic10.tif'	Holes	1	2	0	0	3.3748	13.6709
2018	21	'Images\Trypophobic3.tif'	Holes	1	3	-1	1	16.9718	26.3801
2018	22	'Images\snake40.tif'	Threat	3	4	-2	2	-11.9618	-3.44142
2018	23	'Images\Foveating (10).tif'	Control	1	1	1	1	-1.54676	7.8615
2018	24	'Images\Foveating (20).tif'	Control	1	1	0	0	0.167502	10.4636
2018	25	'Images\Trypophobic7.tif'	Holes	1	2	-1	1	-19.4136	-10.0054
2018	26	'Images\spider14.tif'	Threat	2	2	-1	1	-16.9493	-7.54101
2018	27	'Images\Trypophobic11.tif'	Holes	1	2	-1	1	-1.28498	8.12328
2018	28	'Images\snake4.tif'	Threat	1	1	0	0	-28.2013	-17.9052
2018	29	'Images\spider8.tif'	Threat	2	1	-1	1	-28.2875	-18.8793
2018	30	'Images\Trypophobic12.tif'	Holes	1	1	0	0	-36.965	-26.6689
2018	31	'Images\spider32.tif'	Threat	2	2	-1	1	-41.4432	-32.0349
2018	32	'Images\snake41.tif'	Threat	3	1	-2	2	-29.7443	-21.2239
2018	33	'Images\Trypophobic19.tif'	Holes	1	4	-2	2	1.43982	9.96022
2018	34	'Images\spider21.tif'	Threat	2	2	-1	1	35.7109	45.1191
2018	35	'Images\Foveating (2).tif'	Control	1	1	1	1	-13.5285	-4.12023
2018	36	'Images\Foveating (15).tif'	Control	1	1	0	0	-15.4392	-5.14307
2018	37	'Images\snake22.tif'	Threat	2	1	-1	1	-3.08041	6.32785
2018	38	'Images\Foveating (8).tif'	Control	1	1	0	0	-7.72787	2.56824
2018	39	'Images\Foveating (5).tif'	Control	1	1	1	1	30.9715	40.3798
2018	40	'Images\Trypophobic20.tif'	Holes	1	2	-1	1	-3.14402	6.26424
2018	41	'Images\Foveating (18).tif'	Control	1	1	0	0	-28.8724	-18.5762
2018	42	'Images\spider55.tif'	Threat	2	1	-1	1	45.6903	55.0986
2018	43	'Images\spider42.tif'	Threat	2	2	-2	2	-51.1684	-42.648
2018	44	'Images\spider24.tif'	Threat	2	1	0	0	-4.01888	6.27723
2018	45	'Images\Foveating (11).tif'	Control	1	1	1	1	21.8672	31.2755
2018	46	'Images\spider1.tif'	Threat	2	3	-2	2	13.0885	21.6089
2018	47	'Images\Trypophobic13.tif'	Holes	1	2	-1	1	-5.55363	3.85463
2018	48	'Images\Trypophobic16.tif'	Holes	1	1	0	0	-51.3266	-41.0305
2018	49	'Images\Foveating (17).tif'	Control	1	1	0	0	-19.1223	-8.82617
2018	50	'Images\spider29.tif'	Threat	2	3	-1	1	-9.92338	-0.51512
2018	51	'Images\Foveating (13).tif'	Control	1	1	0	0	-30.501	-20.2049
2018	52	'Images\Foveating (1).tif'	Control	1	1	0	0	0.291288	10.5874
2018	53	'Images\Trypophobic18.tif'	Holes	1	4	-2	2	8.40386	16.9243
2018	54	'Images\Foveating (12).tif'	Control	1	1	0	0	-11.0584	-0.76233
2018	55	'Images\Foveating (9).tif'	Control	1	1	0	0	-27.313	-17.0169
2018	56	'Images\Foveating (6).tif'	Control	1	1	0	0	-7.92432	2.37179
2018	57	'Images\Trypophobic14.tif'	Holes	1	2	0	0	-20.1401	-9.84398
2018	58	'Images\Foveating (4).tif'	Control	1	1	0	0	11.7736	22.0697
2018	59	'Images\Trypophobic9.tif'	Holes	1	2	0	0	-27.7448	-17.4487
2018	60	'Images\Foveating (14).tif'	Control	1	1	0	0	-19.7754	-9.47925
2019	1	'Images\Trypophobic3.tif'	Holes	1	1	0	0	-35.2771	-24.981
2019	2	'Images\Trypophobic6.tif'	Holes	1	1	0	0	-32.4523	-22.1561
2019	3	'Images\Foveating (4).tif'	Control	1	1	2	2	-43.4387	-34.9183
2019	4	'Images\Trypophobic13.tif'	Holes	1	1	0	0	0.994756	11.2909
2019	5	'Images\Foveating (11).tif'	Control	1	1	2	2	-30.995	-22.4746
2019	6	'Images\Trypophobic2.tif'	Holes	1	1	0	0	-7.43604	2.86007
2019	7	'Images\Trypophobic16.tif'	Holes	1	1	0	0	-11.7031	-1.40696
2019	8	'Images\snake41.tif'	Threat	7	7	-3	3	-18.9954	-11.3629
2019	9	'Images\spider14.tif'	Threat	2	4	-2	2	-25.475	-16.9546
2019	10	'Images\Foveating (14).tif'	Control	1	1	0	0	-33.5925	-23.2964
2019	11	'Images\Trypophobic18.tif'	Holes	1	3	-1	1	-11.5133	-2.105
2019	12	'Images\spider42.tif'	Threat	2	3	-2	2	-10.415	-1.89461
2019	13	'Images\Foveating (10).tif'	Control	1	1	0	0	-23.5183	-13.2222
2019	14	'Images\Trypophobic8.tif'	Holes	1	1	0	0	-6.36574	3.93038
2019	15	'Images\Foveating (17).tif'	Control	1	1	1	1	-20.7897	-11.3814
2019	16	'Images\Foveating (18).tif'	Control	1	1	0	0	-34.0186	-23.7225
2019	17	'Images\Foveating (8).tif'	Control	1	1	0	0	-17.1638	-6.86765
2019	18	'Images\Trypophobic10.tif'	Holes	2	1	-1	1	6.89131	16.2996
2019	19	'Images\Foveating (15).tif'	Control	1	1	1	1	-13.0794	-3.67112
2019	20	'Images\Foveating (16).tif'	Control	1	1	0	0	-16.8833	-6.58714
2019	21	'Images\snake57.tif'	Threat	7	7	-3	3	14.0597	21.6923
2019	22	'Images\spider8.tif'	Threat	3	4	-2	2	-14.9888	-6.46839
2019	23	'Images\snake25.tif'	Threat	7	7	-3	3	-12.0481	-4.41558
2019	24	'Images\Foveating (6).tif'	Control	1	1	2	2	-18.1513	-9.6309
2019	25	'Images\spider55.tif'	Threat	1	3	-2	2	12.6858	21.2062
2019	26	'Images\Foveating (5).tif'	Control	1	1	0	0	-3.38289	6.91322
2019	27	'Images\Trypophobic19.tif'	Holes	1	1	0	0	12.993	23.2891
2019	28	'Images\Trypophobic14.tif'	Holes	1	1	0	0	-20.8383	-10.5422
2019	29	'Images\Trypophobic17.tif'	Holes	1	2	-1	1	-31.5969	-22.1886
2019	30	'Images\Foveating (3).tif'	Control	1	1	0	0	16.1314	26.4276
2019	31	'Images\snake43.tif'	Threat	7	7	-3	3	-15.1759	-7.54334
2019	32	'Images\Foveating (7).tif'	Control	1	1	0	0	0.343161	10.6393
2019	33	'Images\Foveating (12).tif'	Control	1	1	0	0	-26.8907	-16.5946
2019	34	'Images\spider21.tif'	Threat	2	5	-2	2	-1.85038	6.67002
2019	35	'Images\snake32.tif'	Threat	7	7	-3	3	-17.8114	-10.1788
2019	36	'Images\Trypophobic7.tif'	Holes	1	1	0	0	-11.4041	-1.10796
2019	37	'Images\spider1.tif'	Threat	2	3	-1	1	9.43397	18.8422
2019	38	'Images\Foveating (1).tif'	Control	1	1	0	0	-18.6766	-8.38049
2019	39	'Images\Foveating (19).tif'	Control	1	1	0	0	-11.0197	-0.72356
2019	40	'Images\Trypophobic20.tif'	Holes	1	1	2	2	-32.6708	-24.1504
2019	41	'Images\snake26.tif'	Threat	7	7	-3	3	-2.26089	5.37165
2019	42	'Images\Trypophobic9.tif'	Holes	1	3	-1	1	12.5081	21.9163
2019	43	'Images\spider29.tif'	Threat	3	4	-1	1	-11.906	-2.49778
2019	44	'Images\Foveating (9).tif'	Control	1	1	1	1	-15.4915	-6.08325
2019	45	'Images\snake40.tif'	Threat	7	7	-3	3	-12.1148	-4.48228
2019	46	'Images\Trypophobic1.tif'	Holes	1	1	0	0	-14.9302	-4.63406
2019	47	'Images\spider32.tif'	Threat	3	5	-2	2	-13.5156	-4.99517
2019	48	'Images\spider24.tif'	Threat	2	4	-2	2	22.9253	31.4457
2019	49	'Images\snake4.tif'	Threat	7	7	-3	3	-3.48755	4.145
2019	50	'Images\snake22.tif'	Threat	7	7	-3	3	-25.8674	-18.2349
2019	51	'Images\Trypophobic12.tif'	Holes	1	1	0	0	-11.8535	-1.5574
2019	52	'Images\Trypophobic15.tif'	Holes	1	1	0	0	-19.6535	-9.35741
2019	53	'Images\Trypophobic5.tif'	Holes	1	1	3	3	3.23665	10.8692
2019	54	'Images\Trypophobic4.tif'	Holes	1	2	0	0	-9.68083	0.61528
2019	55	'Images\snake28.tif'	Threat	7	7	-3	3	-0.0987882	7.53376
2019	56	'Images\Foveating (2).tif'	Control	1	1	1	1	-32.6653	-23.2571
2019	57	'Images\Trypophobic11.tif'	Holes	1	2	0	0	8.93655	19.2327
2019	58	'Images\Foveating (13).tif'	Control	1	1	0	0	-32.8377	-22.5416
2019	59	'Images\Foveating (20).tif'	Control	1	1	0	0	-18.8509	-8.55482
2019	60	'Images\spider22.tif'	Threat	2	3	-1	1	6.12246	15.5307
2020	1	'Images\Foveating (13).tif'	Control	1	1	-1	1	-26.8032	-17.3949
2020	2	'Images\snake40.tif'	Threat	3	5	-2	2	-20.3585	-11.8381
2020	3	'Images\snake32.tif'	Threat	1	1	0	0	-20.0891	-9.793
2020	4	'Images\Trypophobic10.tif'	Holes	1	4	-1	1	-6.97193	2.43633
2020	5	'Images\Trypophobic5.tif'	Holes	1	2	0	0	-11.4883	-1.19216
2020	6	'Images\Trypophobic16.tif'	Holes	1	2	0	0	-14.391	-4.09484
2020	7	'Images\spider55.tif'	Threat	1	3	-1	1	2.55573	11.964
2020	8	'Images\Foveating (6).tif'	Control	1	1	0	0	-10.7151	-0.419
2020	9	'Images\spider32.tif'	Threat	2	3	-2	2	-8.32647	0.19393
2020	10	'Images\Trypophobic18.tif'	Holes	6	-3	-3	3	-14.2685	-6.63593
2020	11	'Images\Trypophobic1.tif'	Holes	5	7	-3	3	-16.798	-9.16545
2020	12	'Images\Foveating (11).tif'	Control	1	1	0	0	-21.5983	-11.3022
2020	13	'Images\Trypophobic6.tif'	Holes	1	5	0	0	-18.2945	-7.99843
2020	14	'Images\Foveating (3).tif'	Control	1	1	0	0	-9.52765	0.76847
2020	15	'Images\snake57.tif'	Threat	1	1	0	0	-10.2498	0.04636
2020	16	'Images\Trypophobic2.tif'	Holes	1	1	2	2	-7.28346	1.23694
2020	17	'Images\Trypophobic15.tif'	Holes	1	4	-1	1	-27.407	-17.9987
2020	18	'Images\Trypophobic11.tif'	Holes	1	3	-1	1	5.16984	14.5781
2020	19	'Images\Trypophobic13.tif'	Holes	1	2	0	0	-30.5361	-20.24
2020	20	'Images\Trypophobic3.tif'	Holes	6	4	-2	2	-1.56215	6.95825
2020	21	'Images\spider29.tif'	Threat	3	4	-1	1	2.49246	11.9007
2020	22	'Images\Foveating (2).tif'	Control	1	1	0	0	-15.4963	-5.20023
2020	23	'Images\Foveating (16).tif'	Control	3	1	-1	1	-5.81638	3.59188
2020	24	'Images\snake25.tif'	Threat	1	1	0	0	-21.4919	-11.1958
2020	25	'Images\Trypophobic19.tif'	Holes	4	3	-2	2	-5.60538	2.91502
2020	26	'Images\Foveating (8).tif'	Control	1	1	-2	2	-3.26772	5.25268
2020	27	'Images\Trypophobic4.tif'	Holes	2	4	-1	1	-24.9847	-15.5764
2020	28	'Images\Foveating (14).tif'	Control	1	1	0	0	-1.93812	8.35799
2020	29	'Images\Trypophobic7.tif'	Holes	1	3	-2	2	-1.04663	7.47377
2020	30	'Images\snake4.tif'	Threat	1	1	0	0	-8.4199	1.87622
2020	31	'Images\Foveating (15).tif'	Control	1	1	-1	1	-6.9128	2.49546
2020	32	'Images\Trypophobic14.tif'	Holes	1	3	-2	2	-7.12656	1.39384
2020	33	'Images\Foveating (12).tif'	Control	1	1	0	0	-4.74917	5.54694
2020	34	'Images\Trypophobic12.tif'	Holes	1	1	0	0	-11.8311	-1.53498
2020	35	'Images\snake28.tif'	Threat	1	1	0	0	-1.47981	8.8163
2020	36	'Images\snake43.tif'	Threat	1	2	0	0	-12.9735	-2.67735
2020	37	'Images\spider14.tif'	Threat	3	1	-1	1	-8.58904	0.81922
2020	38	'Images\Foveating (9).tif'	Control	1	1	0	0	-4.71837	5.57775
2020	39	'Images\Foveating (19).tif'	Control	1	1	0	0	37.4782	47.7743
2020	40	'Images\snake22.tif'	Threat	1	3	0	0	-12.1111	-1.81498
2020	41	'Images\Trypophobic8.tif'	Holes	1	5	-2	2	-2.97502	5.54538
2020	42	'Images\Foveating (5).tif'	Control	1	1	0	0	-16.5572	-6.26112
2020	43	'Images\spider24.tif'	Threat	1	1	1	1	5.09379	14.5021
2020	44	'Images\Trypophobic9.tif'	Holes	1	2	0	0	-16.2162	-5.92009
2020	45	'Images\Foveating (4).tif'	Control	4	1	0	0	-2.44899	7.84713
2020	46	'Images\Foveating (17).tif'	Control	1	1	0	0	-21.7967	-11.5006
2020	47	'Images\spider42.tif'	Threat	1	1	-1	1	-6.32326	3.085
2020	48	'Images\Trypophobic17.tif'	Holes	4	5	-3	3	-11.9867	-4.35416
2020	49	'Images\Foveating (18).tif'	Control	1	1	-2	2	-6.73958	1.78082
2020	50	'Images\spider22.tif'	Threat	1	1	0	0	-18.0886	-7.79252
2020	51	'Images\Foveating (20).tif'	Control	1	1	0	0	-6.7935	3.50261
2020	52	'Images\snake26.tif'	Threat	1	1	-1	1	-19.556	-10.1477
2020	53	'Images\spider8.tif'	Threat	3	2	-2	2	1.14865	9.66905
2020	54	'Images\Foveating (7).tif'	Control	1	1	0	0	2.19371	12.4898
2020	55	'Images\spider21.tif'	Threat	3	2	-1	1	-7.34373	2.06453
2020	56	'Images\Trypophobic20.tif'	Holes	4	5	-2	2	10.2378	18.7582
2020	57	'Images\Foveating (10).tif'	Control	1	1	0	0	-0.32826	9.96785
2020	58	'Images\spider1.tif'	Threat	3	2	-1	1	5.20955	14.6178
2020	59	'Images\snake41.tif'	Threat	3	3	-1	1	-0.463624	8.94463
2020	60	'Images\Foveating (1).tif'	Control	1	1	0	0	-0.343208	9.95291
2021	1	'Images\spider55.tif'	Threat	5	6	-2	2	0.91194	9.43234
2021	2	'Images\snake32.tif'	Threat	6	6	-2	2	-17.4743	-8.95387
2021	3	'Images\snake25.tif'	Threat	4	4	-2	2	-13.3211	-4.80074
2021	4	'Images\Foveating (8).tif'	Control	1	1	2	2	-1.05448	7.46593
2021	5	'Images\Trypophobic11.tif'	Holes	1	1	2	2	-11.8117	-3.29132
2021	6	'Images\Trypophobic10.tif'	Holes	2	1	-1	1	-10.627	-1.21873
2021	7	'Images\Foveating (7).tif'	Control	1	1	1	1	-10.5828	-1.17453
2021	8	'Images\Foveating (6).tif'	Control	1	1	1	1	-10.2823	-0.87408
2021	9	'Images\Foveating (14).tif'	Control	1	1	1	1	-10.3005	-0.89228
2021	10	'Images\Trypophobic18.tif'	Holes	2	2	-1	1	-5.71316	3.6951
2021	11	'Images\Trypophobic16.tif'	Holes	1	1	0	0	-6.54947	3.74664
2021	12	'Images\Foveating (12).tif'	Control	1	1	1	1	-8.66865	0.73961
2021	13	'Images\snake22.tif'	Threat	3	3	-1	1	-13.5234	-4.11519
2021	14	'Images\Trypophobic2.tif'	Holes	1	1	2	2	-6.36943	2.15097
2021	15	'Images\snake41.tif'	Threat	4	3	0	0	-4.88352	5.4126
2021	16	'Images\Trypophobic5.tif'	Holes	1	1	3	3	-12.76	-5.12749
2021	17	'Images\spider24.tif'	Threat	6	7	-3	3	13.4343	21.0669
2021	18	'Images\Foveating (15).tif'	Control	1	1	0	0	-0.0981165	10.198
2021	19	'Images\Foveating (18).tif'	Control	1	1	0	0	-14.9843	-4.68816
2021	20	'Images\Foveating (9).tif'	Control	1	1	2	2	2.00203	10.5224
2021	21	'Images\Trypophobic17.tif'	Holes	1	2	-1	1	-16.8149	-7.40663
2021	22	'Images\Trypophobic20.tif'	Holes	1	2	0	0	-4.64036	5.65575
2021	23	'Images\Foveating (3).tif'	Control	1	1	2	2	-7.03507	1.48533
2021	24	'Images\spider1.tif'	Threat	4	5	-2	2	-6.86041	1.65999
2021	25	'Images\spider14.tif'	Threat	5	6	-2	2	-10.6588	-2.1384
2021	26	'Images\spider32.tif'	Threat	5	5	-2	2	7.36496	15.8854
2021	27	'Images\spider21.tif'	Threat	7	6	-3	3	-11.4216	-3.78902
2021	28	'Images\Foveating (2).tif'	Control	1	1	2	2	-10.0658	-1.54539
2021	29	'Images\Trypophobic15.tif'	Holes	1	1	0	0	-2.1976	8.09851
2021	30	'Images\Foveating (5).tif'	Control	1	1	2	2	-0.707747	7.81265
2021	31	'Images\Foveating (10).tif'	Control	1	1	0	0	-8.1129	2.18321
2021	32	'Images\Foveating (19).tif'	Control	1	1	0	0	5.31243	15.6085
2021	33	'Images\Trypophobic1.tif'	Holes	1	1	0	0	-3.09513	7.20098
2021	34	'Images\Trypophobic9.tif'	Holes	1	2	-1	1	2.82142	12.2297
2021	35	'Images\Trypophobic8.tif'	Holes	1	1	1	1	-11.0333	-1.62502
2021	36	'Images\spider42.tif'	Threat	6	6	-2	2	-3.19225	5.32815
2021	37	'Images\snake43.tif'	Threat	4	4	-1	1	-12.3448	-2.93655
2021	38	'Images\snake26.tif'	Threat	5	4	-1	1	-4.40759	5.00067
2021	39	'Images\spider22.tif'	Threat	4	4	-2	2	7.88922	16.4096
2021	40	'Images\spider8.tif'	Threat	6	6	-2	2	-6.53437	1.98603
2021	41	'Images\Trypophobic7.tif'	Holes	1	1	0	0	-4.75429	5.54182
2021	42	'Images\Trypophobic4.tif'	Holes	1	1	0	0	11.0816	21.3777
2021	43	'Images\Foveating (11).tif'	Control	1	1	0	0	-16.5698	-6.27366
2021	44	'Images\Foveating (20).tif'	Control	1	1	0	0	-3.57999	6.71613
2021	45	'Images\Foveating (17).tif'	Control	1	1	0	0	-16.7299	-6.43377
2021	46	'Images\Trypophobic19.tif'	Holes	1	2	-1	1	6.38649	15.7948
2021	47	'Images\Trypophobic13.tif'	Holes	1	1	1	1	-8.90609	0.50217
2021	48	'Images\Foveating (16).tif'	Control	1	1	0	0	16.5469	26.843
2021	49	'Images\snake40.tif'	Threat	4	4	-1	1	-2.60099	6.80727
2021	50	'Images\snake28.tif'	Threat	4	4	-1	1	-20.0734	-10.6652
2021	51	'Images\Foveating (4).tif'	Control	1	1	2	2	4.5422	13.0626
2021	52	'Images\snake57.tif'	Threat	5	5	-2	2	0.948876	9.46928
2021	53	'Images\Trypophobic6.tif'	Holes	1	1	0	0	-19.5818	-9.28566
2021	54	'Images\snake4.tif'	Threat	4	4	-1	1	5.58441	14.9927
2021	55	'Images\Trypophobic3.tif'	Holes	1	2	0	0	-15.9861	-5.68997
2021	56	'Images\Foveating (13).tif'	Control	1	1	-1	1	-9.41349	-0.00523
2021	57	'Images\Trypophobic14.tif'	Holes	1	1	0	0	-3.80638	6.48973
2021	58	'Images\Trypophobic12.tif'	Holes	1	1	3	3	-5.86661	1.76593
2021	59	'Images\Foveating (1).tif'	Control	1	1	1	1	18.8246	28.2328
2021	60	'Images\spider29.tif'	Threat	6	7	-2	2	2.10408	10.6245
2022	1	'Images\spider42.tif'	Threat	7	7	-3	3	-40.1231	-32.4905
2022	2	'Images\snake57.tif'	Threat	7	7	-3	3	2.20273	9.83527
2022	3	'Images\Trypophobic14.tif'	Holes	3	5	-1	1	-22.4171	-13.0089
2022	4	'Images\Trypophobic12.tif'	Holes	1	1	1	1	16.5159	25.9241
2022	5	'Images\Foveating (20).tif'	Control	1	1	0	0	-31.9473	-21.6512
2022	6	'Images\Foveating (12).tif'	Control	1	1	-1	1	-26.2805	-16.8723
2022	7	'Images\Foveating (17).tif'	Control	1	1	0	0	-24.4288	-14.1327
2022	8	'Images\snake41.tif'	Threat	7	7	-3	3	-18.6238	-10.9913
2022	9	'Images\Trypophobic13.tif'	Holes	3	1	-2	2	-22.6926	-14.1722
2022	10	'Images\snake25.tif'	Threat	7	7	-3	3	-11.5422	-3.90967
2022	11	'Images\spider1.tif'	Threat	6	6	-3	3	-7.85976	-0.22722
2022	12	'Images\Trypophobic1.tif'	Holes	6	6	-2	2	-11.7522	-3.23181
2022	13	'Images\Foveating (4).tif'	Control	1	1	0	0	-29.8682	-19.5721
2022	14	'Images\spider21.tif'	Threat	5	4	-2	2	-2.21829	6.30212
2022	15	'Images\Foveating (14).tif'	Control	1	1	0	0	5.84597	16.1421
2022	16	'Images\Trypophobic18.tif'	Holes	4	4	-2	2	-10.8593	-2.33891
2022	17	'Images\snake22.tif'	Threat	7	7	-3	3	-18.0615	-10.429
2022	18	'Images\spider8.tif'	Threat	7	7	-3	3	24.3568	31.9894
2022	19	'Images\Foveating (7).tif'	Control	0	1	0	0	2.56913	12.8652
2022	20	'Images\Trypophobic8.tif'	Holes	1	1	-1	1	-2.03296	7.37529
2022	21	'Images\Foveating (8).tif'	Control	1	1	0	0	-29.9139	-19.6178
2022	22	'Images\Trypophobic5.tif'	Holes	3	6	-2	2	-30.112	-21.5916
2022	23	'Images\Trypophobic6.tif'	Holes	3	3	-1	1	8.6005	18.0088
2022	24	'Images\Foveating (3).tif'	Control	1	1	0	0	12.2406	22.5367
2022	25	'Images\spider14.tif'	Threat	7	7	-3	3	-7.66532	-0.03278
2022	26	'Images\Foveating (18).tif'	Control	1	1	0	0	-7.41677	2.87934
2022	27	'Images\Foveating (19).tif'	Control	1	1	0	0	-24.6508	-14.3547
2022	28	'Images\Foveating (16).tif'	Control	1	1	0	0	-12.9842	-2.68808
2022	29	'Images\spider32.tif'	Threat	7	7	-3	3	-31.5318	-23.8993
2022	30	'Images\Trypophobic15.tif'	Holes	4	4	-3	3	-12.3293	-4.69673
2022	31	'Images\Foveating (6).tif'	Control	1	1	0	0	4.16291	14.459
2022	32	'Images\Trypophobic7.tif'	Holes	3	3	0	0	-15.0176	-4.72144
2022	33	'Images\Foveating (10).tif'	Control	1	1	0	0	17.4438	27.7399
2022	34	'Images\snake40.tif'	Threat	6	6	-3	3	-32.475	-24.8425
2022	35	'Images\snake28.tif'	Threat	7	7	-3	3	-16.6129	-8.98031
2022	36	'Images\Trypophobic9.tif'	Holes	5	5	-2	2	30.9682	39.4886
2022	37	'Images\Trypophobic20.tif'	Holes	5	5	-1	1	-22.8758	-13.4675
2022	38	'Images\Foveating (15).tif'	Control	1	1	0	0	25.658	35.9541
2022	39	'Images\Trypophobic10.tif'	Holes	1	4	-2	2	18.7136	27.234
2022	40	'Images\Trypophobic17.tif'	Holes	4	4	-2	2	1.54376	10.0642
2022	41	'Images\snake43.tif'	Threat	6	6	-3	3	-29.1866	-21.5541
2022	42	'Images\Foveating (9).tif'	Control	1	1	0	0	11.3871	21.6833
2022	43	'Images\spider55.tif'	Threat	7	7	-3	3	-23.0084	-15.3759
2022	44	'Images\Foveating (11).tif'	Control	1	1	0	0	-8.14731	2.1488
2022	45	'Images\Foveating (1).tif'	Control	1	1	0	0	-30.4598	-20.1636
2022	46	'Images\snake32.tif'	Threat	7	7	-3	3	-2.80344	4.8291
2022	47	'Images\Trypophobic4.tif'	Holes	4	4	-2	2	-23.0074	-14.487
2022	48	'Images\Foveating (5).tif'	Control	1	1	0	0	-14.696	-4.39991
2022	49	'Images\Trypophobic3.tif'	Holes	3	4	-1	1	80.4054	89.8136
2022	50	'Images\Foveating (13).tif'	Control	1	2	-1	1	-13.6142	-4.2059
2022	51	'Images\Trypophobic11.tif'	Holes	1	4	-1	1	-6.3813	3.02696
2022	52	'Images\spider24.tif'	Threat	7	7	-3	3	4.25529	11.8878
2022	53	'Images\Trypophobic19.tif'	Holes	4	4	-2	2	7.73151	16.2519
2022	54	'Images\spider29.tif'	Threat	7	7	-3	3	-2.66604	4.96651
2022	55	'Images\Foveating (2).tif'	Control	1	1	0	0	-25.7992	-15.5031
2022	56	'Images\snake4.tif'	Threat	7	7	-3	3	19.0355	26.6681
2022	57	'Images\spider22.tif'	Threat	7	7	-3	3	19.9534	27.5859
2022	58	'Images\snake26.tif'	Threat	6	7	-3	3	-1.86677	5.76578
2022	59	'Images\Trypophobic2.tif'	Holes	1	1	0	0	-14.9231	-4.62703
2022	60	'Images\Trypophobic16.tif'	Holes	3	4	-1	1	-17.5565	-8.14826
2023	1	'Images\Trypophobic15.tif'	Holes	3	5	-2	2	-45.9565	-37.4361
2023	2	'Images\Foveating (11).tif'	Control	1	1	0	0	-9.65005	0.64606
2023	3	'Images\Trypophobic1.tif'	Holes	5	6	-3	3	-17.7518	-10.1192
2023	4	'Images\Trypophobic5.tif'	Holes	1	1	2	2	-16.885	-8.36459
2023	5	'Images\snake26.tif'	Threat	4	2	-2	2	11.459	19.9794
2023	6	'Images\Foveating (6).tif'	Control	1	1	-3	3	-24.0526	-16.4201
2023	7	'Images\Foveating (16).tif'	Control	1	1	-2	2	-18.7747	-10.2543
2023	8	'Images\snake43.tif'	Threat	4	2	-1	1	-18.8616	-9.45339
2023	9	'Images\snake22.tif'	Threat	2	2	-1	1	-19.9696	-10.5613
2023	10	'Images\Trypophobic16.tif'	Holes	1	3	-2	2	-5.30622	3.21419
2023	11	'Images\spider14.tif'	Threat	5	2	-2	2	-3.21257	5.30783
2023	12	'Images\spider22.tif'	Threat	3	2	-1	1	25.7499	35.1582
2023	13	'Images\spider1.tif'	Threat	5	3	-2	2	-4.65389	3.86651
2023	14	'Images\snake40.tif'	Threat	5	4	-2	2	-13.1073	-4.58686
2023	15	'Images\Foveating (14).tif'	Control	1	1	-2	2	4.21344	12.7338
2023	16	'Images\spider29.tif'	Threat	5	4	-3	3	-2.00905	5.6235
2023	17	'Images\Foveating (5).tif'	Control	1	1	3	3	-5.53988	2.09266
2023	18	'Images\Trypophobic6.tif'	Holes	2	6	-3	3	-16.7729	-9.14034
2023	19	'Images\Foveating (9).tif'	Control	1	2	-1	1	-15.1482	-5.73997
2023	20	'Images\Trypophobic7.tif'	Holes	1	2	-2	2	-25.2241	-16.7037
2023	21	'Images\Trypophobic14.tif'	Holes	2	4	-3	3	-4.32981	3.30274
2023	22	'Images\Foveating (8).tif'	Control	1	1	2	2	2.28584	10.8062
2023	23	'Images\spider8.tif'	Threat	4	3	-2	2	-5.76855	2.75186
2023	24	'Images\spider24.tif'	Threat	5	3	-1	1	1.37271	10.781
2023	25	'Images\Foveating (1).tif'	Control	1	1	-1	1	15.3621	24.7704
2023	26	'Images\spider42.tif'	Threat	4	2	-2	2	-1.06906	7.45134
2023	27	'Images\Foveating (3).tif'	Control	1	1	2	2	-21.5231	-13.0026
2023	28	'Images\snake57.tif'	Threat	2	1	-1	1	14.8694	24.2777
2023	29	'Images\Trypophobic8.tif'	Holes	1	3	-2	2	-18.9244	-10.404
2023	30	'Images\Foveating (10).tif'	Control	1	1	-2	2	14.8782	23.3986
2023	31	'Images\Foveating (12).tif'	Control	1	1	-2	2	-31.6158	-23.0954
2023	32	'Images\Trypophobic19.tif'	Holes	5	5	-3	3	-5.04794	2.5846
2023	33	'Images\Foveating (7).tif'	Control	1	1	2	2	-26.8536	-18.3332
2023	34	'Images\Trypophobic4.tif'	Holes	4	2	-1	1	-23.0644	-13.6562
2023	35	'Images\Trypophobic3.tif'	Holes	3	4	-2	2	-7.54408	0.97632
2023	36	'Images\snake41.tif'	Threat	3	2	-2	2	-14.7479	-6.22752
2023	37	'Images\Foveating (20).tif'	Control	1	1	-2	2	-8.59643	-0.07603
2023	38	'Images\spider55.tif'	Threat	4	3	-2	2	20.514	29.0344
2023	39	'Images\Foveating (13).tif'	Control	1	1	1	1	-17.9127	-8.50448
2023	40	'Images\Foveating (18).tif'	Control	1	1	-2	2	-11.2952	-2.77483
2023	41	'Images\Trypophobic2.tif'	Holes	1	5	-1	1	-7.18567	2.22259
2023	42	'Images\Trypophobic20.tif'	Holes	1	2	-1	1	-23.3986	-13.9903
2023	43	'Images\Foveating (19).tif'	Control	1	1	1	1	17.5835	26.9918
2023	44	'Images\Foveating (17).tif'	Control	1	1	2	2	-2.19796	6.32244
2023	45	'Images\Foveating (4).tif'	Control	1	1	1	1	-7.87331	1.53495
2023	46	'Images\Trypophobic11.tif'	Holes	1	1	1	1	-6.61548	2.79278
2023	47	'Images\snake25.tif'	Threat	5	2	-2	2	-36.1929	-27.6725
2023	48	'Images\snake28.tif'	Threat	3	2	-1	1	-5.70163	3.70663
2023	49	'Images\Trypophobic12.tif'	Holes	1	1	2	2	-6.34692	2.17349
2023	50	'Images\Foveating (2).tif'	Control	1	1	0	0	-23.8626	-13.5664
2023	51	'Images\snake32.tif'	Threat	3	1	-2	2	-13.0186	-4.49822
2023	52	'Images\Trypophobic17.tif'	Holes	2	3	-2	2	-15.7734	-7.25303
2023	53	'Images\spider21.tif'	Threat	2	1	1	1	-11.2799	-1.87164
2023	54	'Images\Trypophobic13.tif'	Holes	2	2	0	0	-5.19558	5.10054
2023	55	'Images\spider32.tif'	Threat	6	3	-3	3	-31.5336	-23.9011
2023	56	'Images\Trypophobic18.tif'	Holes	1	4	-2	2	20.8566	29.3771
2023	57	'Images\snake4.tif'	Threat	3	2	-2	2	-16.1939	-7.67346
2023	58	'Images\Trypophobic10.tif'	Holes	2	3	-2	2	13.4323	21.9527
2023	59	'Images\Foveating (15).tif'	Control	1	1	-1	1	26.0979	35.5062
2023	60	'Images\Trypophobic9.tif'	Holes	3	5	-2	2	-19.3178	-10.7974
2024	1	'Images\spider1.tif'	Threat	5	6	-2	2	-9.07088	-0.55048
2024	2	'Images\spider55.tif'	Threat	3	5	-1	1	-16.2634	-6.85517
2024	3	'Images\spider32.tif'	Threat	5	5	-1	1	-22.7919	-13.3836
2024	4	'Images\spider22.tif'	Threat	4	-1	-1	1	1.89546	11.3037
2024	5	'Images\snake22.tif'	Threat	2	4	0	0	-28.3158	-18.0197
2024	6	'Images\spider21.tif'	Threat	4	4	-2	2	-17.1153	-8.5949
2024	7	'Images\Foveating (11).tif'	Control	1	2	0	0	-6.70011	3.596
2024	8	'Images\Foveating (20).tif'	Control	1	1	0	0	-18.1815	-7.88542
2024	9	'Images\Trypophobic2.tif'	Holes	2	6	-3	3	-7.68902	-0.05647
2024	10	'Images\Trypophobic12.tif'	Holes	1	1	1	1	-11.0571	-1.64886
2024	11	'Images\Foveating (9).tif'	Control	1	4	0	0	-7.20966	3.08645
2024	12	'Images\Trypophobic5.tif'	Holes	2	5	-1	1	-9.26325	0.14501
2024	13	'Images\Foveating (15).tif'	Control	2	1	0	0	-22.3692	-12.0731
2024	14	'Images\Trypophobic1.tif'	Holes	3	7	-3	3	-2.18981	5.44274
2024	15	'Images\Foveating (6).tif'	Control	1	1	0	0	-21.802	-11.5058
2024	16	'Images\Foveating (18).tif'	Control	4	1	0	0	5.16066	15.4568
2024	17	'Images\Foveating (10).tif'	Control	1	1	0	0	-13.9933	-3.69718
2024	18	'Images\Trypophobic10.tif'	Holes	4	4	-1	1	19.1681	28.5763
2024	19	'Images\Foveating (3).tif'	Control	1	1	0	0	-17.5413	-7.24518
2024	20	'Images\Trypophobic19.tif'	Holes	2	7	-2	2	10.705	19.2254
2024	21	'Images\Trypophobic15.tif'	Holes	1	3	-1	1	-36.1562	-26.748
2024	22	'Images\snake40.tif'	Threat	5	2	-1	1	-17.0396	-7.63134
2024	23	'Images\snake41.tif'	Threat	2	3	1	1	0.26674	9.675
2024	24	'Images\Trypophobic7.tif'	Holes	2	6	-2	2	-24.4089	-15.8885
2024	25	'Images\Trypophobic14.tif'	Holes	4	6	-1	1	-27.4191	-18.0109
2024	26	'Images\Foveating (19).tif'	Control	1	1	0	0	-13.7612	-3.46511
2024	27	'Images\Foveating (8).tif'	Control	1	2	0	0	-19.1359	-8.83974
2024	28	'Images\Foveating (12).tif'	Control	1	1	0	0	-14.5154	-4.21931
2024	29	'Images\snake32.tif'	Threat	3	3	-2	2	-28.4693	-19.9489
2024	30	'Images\Trypophobic9.tif'	Holes	5	4	-2	2	-17.169	-8.64863
2024	31	'Images\Trypophobic17.tif'	Holes	3	6	-2	2	-28.7189	-20.1985
2024	32	'Images\Trypophobic16.tif'	Holes	1	5	-1	1	-24.1136	-14.7054
2024	33	'Images\Foveating (2).tif'	Control	1	1	0	0	20.7845	31.0806
2024	34	'Images\Trypophobic4.tif'	Holes	2	7	-2	2	-3.39664	5.12376
2024	35	'Images\snake26.tif'	Threat	3	3	-1	1	-9.00059	0.40767
2024	36	'Images\Trypophobic3.tif'	Holes	3	5	-1	1	-27.7087	-18.3004
2024	37	'Images\Foveating (14).tif'	Control	2	1	0	0	-19.7343	-9.43814
2024	38	'Images\snake28.tif'	Threat	3	4	-1	1	-38.5122	-29.1039
2024	39	'Images\Trypophobic11.tif'	Holes	3	5	-2	2
2024	40	'Images\Trypophobic13.tif'	Holes	2	6	-2	2	-3.54347	4.97693
2024	41	'Images\snake57.tif'	Threat	3	3	2	2	-5.83936	2.68104
2024	42	'Images\Foveating (13).tif'	Control	1	1	0	0	-23.2145	-12.9184
2024	43	'Images\spider8.tif'	Threat	6	5	-2	2	-19.5188	-10.9984
2024	44	'Images\spider14.tif'	Threat	5	3	-1	1	-24.6142	-15.206
2024	45	'Images\spider42.tif'	Threat	2	2	-1	1	-3.23991	6.16835
2024	46	'Images\snake43.tif'	Threat	3	3	-1	1	-18.0546	-8.6463
2024	47	'Images\Trypophobic18.tif'	Holes	2	6	-2	2	-26.1156	-17.5952
2024	48	'Images\spider29.tif'	Threat	3	3	-1	1	-36.9161	-27.5078
2024	49	'Images\Foveating (16).tif'	Control	1	1	0	0	76.4932	86.7893
2024	50	'Images\Trypophobic20.tif'	Holes	3	6	-1	1	-16.7503	-7.342
2024	51	'Images\Foveating (4).tif'	Control	2	2	-2	2	-40.6376	-32.1172
2024	52	'Images\snake25.tif'	Threat	5	4	-2	2	44.7671	53.2875
2024	53	'Images\Foveating (17).tif'	Control	1	1	0	0	-18.6463	-8.35023
2024	54	'Images\Foveating (1).tif'	Control	3	1	0	0	8.91826	19.2144
2024	55	'Images\Foveating (5).tif'	Control	2	2	0	0	-30.681	-20.3849
2024	56	'Images\Foveating (7).tif'	Control	2	2	1	1	-14.1897	-4.78139
2024	57	'Images\spider24.tif'	Threat	3	5	-2	2	-5.02703	3.49337
2024	58	'Images\Trypophobic6.tif'	Holes	6	6	-2	2	-2.20721	6.31319
2024	59	'Images\Trypophobic8.tif'	Holes	6	6	-2	2	3.13962	11.66
2024	60	'Images\snake4.tif'	Threat	2	2	0	0	-27.8306	-17.5344
2025	1	'Images\spider55.tif'	Threat	2	1	-2	2	23.3671	31.8875
2025	2	'Images\Foveating (1).tif'	Control	1	1	0	0	16.1452	26.4414
2025	3	'Images\Foveating (5).tif'	Control	1	1	0	0	-20.3883	-10.0922
2025	4	'Images\Trypophobic8.tif'	Holes	1	1	0	0	3.2489	13.545
2025	5	'Images\Foveating (15).tif'	Control	1	1	0	0	6.12105	16.4172
2025	6	'Images\Trypophobic18.tif'	Holes	1	1	-3	3	3.58622	11.2188
2025	7	'Images\spider14.tif'	Threat	2	2	0	0	-5.16239	5.13372
2025	8	'Images\Foveating (3).tif'	Control	1	1	0	0	20.3681	30.6643
2025	9	'Images\snake43.tif'	Threat	1	1	0	0	2.54582	12.8419
2025	10	'Images\spider24.tif'	Threat	1	1	0	0	10.5215	20.8176
2025	11	'Images\Trypophobic6.tif'	Holes	1	1	0	0	-15.2566	-4.9605
2025	12	'Images\Foveating (9).tif'	Control	1	1	0	0	5.51953	15.8156
2025	13	'Images\snake26.tif'	Threat	1	1	0	0	7.35629	17.6524
2025	14	'Images\Trypophobic19.tif'	Holes	1	1	0	0	4.06068	14.3568
2025	15	'Images\spider1.tif'	Threat	1	1	0	0	-25.118	-14.8219
2025	16	'Images\Trypophobic4.tif'	Holes	1	1	0	0	-8.43577	1.86034
2025	17	'Images\Foveating (11).tif'	Control	1	1	0	0	3.73436	14.0305
2025	18	'Images\Trypophobic14.tif'	Holes	1	1	0	0	-13.1202	-2.82412
2025	19	'Images\spider21.tif'	Threat	1	2	0	0	18.3713	28.6674
2025	20	'Images\spider8.tif'	Threat	1	2	-3	3	-1.49805	6.1345
2025	21	'Images\Trypophobic2.tif'	Holes	1	1	0	0	-7.62589	2.67022
2025	22	'Images\Foveating (14).tif'	Control	1	1	0	0	-15.0763	-4.78024
2025	23	'Images\snake25.tif'	Threat	1	1	-2	2	-12.9836	-4.46324
2025	24	'Images\Trypophobic9.tif'	Holes	1	1	0	0	-3.37814	6.91797
2025	25	'Images\Foveating (18).tif'	Control	1	1	0	0	12.8891	23.1852
2025	26	'Images\Foveating (17).tif'	Control	1	1	0	0	-1.60581	8.6903
2025	27	'Images\Trypophobic13.tif'	Holes	1	1	0	0	5.27221	15.5683
2025	28	'Images\snake22.tif'	Threat	1	1	0	0	-19.8425	-9.54635
2025	29	'Images\Trypophobic15.tif'	Holes	1	1	0	0	5.15269	15.4488
2025	30	'Images\spider42.tif'	Threat	3	3	0	0	4.81805	15.1142
2025	31	'Images\snake57.tif'	Threat	1	1	0	0	9.56314	19.8592
2025	32	'Images\Trypophobic17.tif'	Holes	1	2	0	0	-11.8224	-1.5263
2025	33	'Images\Trypophobic12.tif'	Holes	1	1	-3	3	-29.6334	-22.0009
2025	34	'Images\Foveating (8).tif'	Control	1	1	0	0	11.1753	21.4714
2025	35	'Images\spider22.tif'	Threat	1	1	0	0	-10.7425	-0.44636
2025	36	'Images\Foveating (4).tif'	Control	1	1	0	0	4.88062	15.1767
2025	37	'Images\spider29.tif'	Threat	1	1	0	0	5.54816	15.8443
2025	38	'Images\Foveating (20).tif'	Control	1	1	0	0	-20.3817	-10.0856
2025	39	'Images\snake28.tif'	Threat	1	1	0	0	13.2842	23.5803
2025	40	'Images\Foveating (13).tif'	Control	1	1	0	0	4.82778	15.1239
2025	41	'Images\Foveating (10).tif'	Control	1	1	0	0	8.02915	18.3253
2025	42	'Images\Foveating (16).tif'	Control	1	1	0	0	-8.16933	2.12678
2025	43	'Images\snake32.tif'	Threat	1	1	0	0	3.79665	14.0928
2025	44	'Images\Trypophobic16.tif'	Holes	1	1	0	0	2.47265	12.7688
2025	45	'Images\Foveating (12).tif'	Control	1	1	0	0	-13.6032	-3.30704
2025	46	'Images\snake41.tif'	Threat	1	1	1	1	20.923	30.3313
2025	47	'Images\Foveating (7).tif'	Control	1	1	-3	3	0.0811355	7.71368
2025	48	'Images\Foveating (2).tif'	Control	1	1	-3	3	24.2486	31.8812
2025	49	'Images\spider32.tif'	Threat	1	1	0	0	-11.1602	-0.86412
2025	50	'Images\snake4.tif'	Threat	5	1	0	0	-7.49632	2.7998
2025	51	'Images\Foveating (6).tif'	Control	1	1	0	0	-13.8029	-3.50681
2025	52	'Images\Trypophobic7.tif'	Holes	1	1	0	0	37.6433	47.9394
2025	53	'Images\snake40.tif'	Threat	1	1	0	0	-0.657884	9.63823
2025	54	'Images\Trypophobic10.tif'	Holes	1	1	0	0	-2.89988	7.39623
2025	55	'Images\Trypophobic20.tif'	Holes	1	1	0	0	2.54929	12.8454
2025	56	'Images\Foveating (19).tif'	Control	1	1	0	0	-3.62245	6.67366
2025	57	'Images\Trypophobic11.tif'	Holes	1	1	0	0	3.81567	14.1118
2025	58	'Images\Trypophobic1.tif'	Holes	1	1	0	0	-4.48361	5.81251
2025	59	'Images\Trypophobic5.tif'	Holes	1	1	0	0	-10.4603	-0.16423
2025	60	'Images\Trypophobic3.tif'	Holes	1	1	0	0	17.998	28.2941
2026	1	'Images\snake26.tif'	Threat	4	5	-1	1	-30.2974	-20.8891
2026	2	'Images\Foveating (4).tif'	Control	1	1	0	0	-18.4364	-8.14029
2026	3	'Images\Foveating (16).tif'	Control	1	1	0	0	-9.49325	0.80287
2026	4	'Images\Foveating (3).tif'	Control	1	1	2	2	-12.6808	-4.16039
2026	5	'Images\Foveating (14).tif'	Control	1	1	0	0	-20.0736	-9.77752
2026	6	'Images\Trypophobic13.tif'	Holes	1	1	0	0	-9.73104	0.56507
2026	7	'Images\Foveating (12).tif'	Control	1	1	0	0	-16.3612	-6.06513
2026	8	'Images\snake40.tif'	Threat	4	4	-1	1	-1.00235	8.40591
2026	9	'Images\Trypophobic12.tif'	Holes	1	1	0	0	-23.7852	-13.4891
2026	10	'Images\Foveating (19).tif'	Control	1	1	0	0	-16.6105	-6.31437
2026	11	'Images\Trypophobic20.tif'	Holes	1	1	0	0	-28.1149	-17.8188
2026	12	'Images\Trypophobic19.tif'	Holes	2	2	0	0	-26.7746	-16.4784
2026	13	'Images\Foveating (10).tif'	Control	1	1	0	0	-11.0847	-0.78856
2026	14	'Images\Foveating (13).tif'	Control	1	1	0	0	-21.6478	-11.3517
2026	15	'Images\Trypophobic4.tif'	Holes	1	1	0	0	-16.6581	-6.36198
2026	16	'Images\Foveating (20).tif'	Control	1	1	0	0	-7.37192	2.92419
2026	17	'Images\Trypophobic14.tif'	Holes	1	1	0	0	-24.3029	-14.0068
2026	18	'Images\Foveating (11).tif'	Control	1	1	0	0	11.4913	21.7874
2026	19	'Images\Trypophobic3.tif'	Holes	1	1	0	0	-22.593	-12.2969
2026	20	'Images\Foveating (9).tif'	Control	1	1	0	0	-19.9133	-9.61714
2026	21	'Images\Foveating (18).tif'	Control	1	1	0	0	-5.70784	4.58827
2026	22	'Images\Trypophobic16.tif'	Holes	1	1	0	0	-16.5859	-6.28977
2026	23	'Images\spider1.tif'	Threat	5	5	-2	2	-9.27751	-0.75711
2026	24	'Images\snake32.tif'	Threat	4	4	-1	1	-33.7539	-24.3457
2026	25	'Images\spider42.tif'	Threat	5	5	-2	2	-19.9709	-11.4505
2026	26	'Images\Trypophobic6.tif'	Holes	1	1	0	0	-15.1094	-4.81333
2026	27	'Images\Trypophobic5.tif'	Holes	1	1	0	0	-35.9349	-25.6388
2026	28	'Images\Foveating (7).tif'	Control	1	1	0	0	8.76	19.0561
2026	29	'Images\Trypophobic15.tif'	Holes	1	1	0	0	-20.3459	-10.0498
2026	30	'Images\Foveating (5).tif'	Control	1	1	0	0	-8.62188	1.67423
2026	31	'Images\snake43.tif'	Threat	4	4	-1	1	-25.921	-16.5127
2026	32	'Images\Trypophobic11.tif'	Holes	1	1	0	0	-14.3117	-4.01556
2026	33	'Images\spider22.tif'	Threat	5	5	-1	1	6.06059	15.4688
2026	34	'Images\spider29.tif'	Threat	5	5	-1	1	-17.4785	-8.07024
2026	35	'Images\snake4.tif'	Threat	4	4	-1	1	-16.4708	-7.06253
2026	36	'Images\Trypophobic8.tif'	Holes	1	1	0	0	-29.1556	-18.8595
2026	37	'Images\Trypophobic10.tif'	Holes	1	1	0	0	0.445296	10.7414
2026	38	'Images\Foveating (2).tif'	Control	1	1	0	0	-19.5405	-9.24435
2026	39	'Images\Trypophobic2.tif'	Holes	1	2	-1	1	-14.6143	-5.20607
2026	40	'Images\Trypophobic17.tif'	Holes	1	1	0	0	-24.1621	-13.866
2026	41	'Images\snake28.tif'	Threat	4	4	-1	1	-25.7528	-16.3446
2026	42	'Images\Foveating (15).tif'	Control	1	1	0	0	-11.9366	-1.64052
2026	43	'Images\spider55.tif'	Threat	5	5	-1	1	-6.74441	2.66384
2026	44	'Images\Trypophobic7.tif'	Holes	1	1	0	0	-25.5807	-15.2846
2026	45	'Images\snake22.tif'	Threat	4	4	-1	1	-7.25011	2.15815
2026	46	'Images\Trypophobic1.tif'	Holes	1	1	0	0	-19.7849	-9.48883
2026	47	'Images\spider14.tif'	Threat	6	5	-2	2	-10.7179	-2.19749
2026	48	'Images\spider24.tif'	Threat	5	5	-2	2	-19.8307	-11.3103
2026	49	'Images\Foveating (17).tif'	Control	1	1	0	0	-14.3537	-4.05758
2026	50	'Images\Trypophobic9.tif'	Holes	1	1	0	0	-19.8868	-9.59065
2026	51	'Images\Foveating (1).tif'	Control	1	1	0	0	-17.5567	-7.26054
2026	52	'Images\Foveating (6).tif'	Control	1	1	0	0	-27.9926	-17.6965
2026	53	'Images\snake41.tif'	Threat	4	4	0	0	-17.7854	-7.48928
2026	54	'Images\snake25.tif'	Threat	4	4	-1	1	-30.6328	-21.2245
2026	55	'Images\spider8.tif'	Threat	5	5	0	0	-6.57376	3.72236
2026	56	'Images\snake57.tif'	Threat	4	4	0	0	-5.20793	5.08818
2026	57	'Images\spider32.tif'	Threat	5	5	-2	2	-11.6704	-3.14996
2026	58	'Images\Trypophobic18.tif'	Holes	2	2	0	0	-19.2613	-8.96519
2026	59	'Images\spider21.tif'	Threat	6	5	-2	2	-15.6655	-7.14508
2026	60	'Images\Foveating (8).tif'	Control	1	1	0	0	-10.3059	-0.00983
2027	1	'Images\snake57.tif'	Threat	6	6	-2	2	-2.98619	5.53422
2027	2	'Images\snake41.tif'	Threat	6	6	-3	3	7.98505	15.6176
2027	3	'Images\Trypophobic12.tif'	Holes	1	1	1	1	-8.08582	1.32244
2027	4	'Images\Trypophobic19.tif'	Holes	4	3	-1	1	-19.6124	-10.2042
2027	5	'Images\Foveating (7).tif'	Control	1	1	0	0	-12.6139	-2.31778
2027	6	'Images\snake43.tif'	Threat	7	7	-3	3	-1.50496	6.12759
2027	7	'Images\spider32.tif'	Threat	7	7	-3	3	-18.0374	-10.4048
2027	8	'Images\spider42.tif'	Threat	7	7	-3	3	-22.1758	-14.5433
2027	9	'Images\Foveating (13).tif'	Control	1	1	0	0	-16.86	-6.56386
2027	10	'Images\Foveating (4).tif'	Control	1	1	-1	1	-18.2332	-8.82492
2027	11	'Images\snake28.tif'	Threat	7	7	-3	3	-10.2309	-2.5984
2027	12	'Images\snake22.tif'	Threat	7	7	-3	3	-6.7824	0.85014
2027	13	'Images\Foveating (1).tif'	Control	1	1	0	0	1.37382	11.6699
2027	14	'Images\snake32.tif'	Threat	5	-2	-2	2	-10.9221	-2.40165
2027	15	'Images\Foveating (15).tif'	Control	1	1	0	0	-16.1152	-5.81904
2027	16	'Images\Trypophobic10.tif'	Holes	1	1	0	0	9.86786	20.164
2027	17	'Images\spider22.tif'	Threat	6	6	-2	2	-8.1016	0.4188
2027	18	'Images\Trypophobic8.tif'	Holes	1	1	0	0	-2.51332	7.78279
2027	19	'Images\Trypophobic1.tif'	Holes	2	2	-1	1	-5.42884	3.97941
2027	20	'Images\spider24.tif'	Threat	7	7	-3	3	24.2415	31.8741
2027	21	'Images\Foveating (11).tif'	Control	1	1	0	0	1.89449	12.1906
2027	22	'Images\Trypophobic3.tif'	Holes	3	3	-1	1	-11.5544	-2.14615
2027	23	'Images\spider14.tif'	Threat	6	6	-2	2	-3.09492	5.42548
2027	24	'Images\Foveating (2).tif'	Control	1	1	0	0	-11.4697	-1.17363
2027	25	'Images\Trypophobic14.tif'	Holes	1	1	0	0	-9.05645	1.23966
2027	26	'Images\Trypophobic17.tif'	Holes	2	3	-1	1	-1.76376	7.6445
2027	27	'Images\snake40.tif'	Threat	7	7	-3	3	-21.0756	-13.4431
2027	28	'Images\Foveating (20).tif'	Control	1	1	0	0	-4.19782	6.0983
2027	29	'Images\Trypophobic13.tif'	Holes	1	1	0	0	-13.9176	-3.62144
2027	30	'Images\Trypophobic7.tif'	Holes	2	1	-1	1	13.5479	22.9562
2027	31	'Images\spider1.tif'	Threat	7	7	-3	3	18.8927	26.5252
2027	32	'Images\Foveating (19).tif'	Control	1	1	0	0	-21.7451	-11.449
2027	33	'Images\snake25.tif'	Threat	7	7	-3	3	-3.43556	4.19699
2027	34	'Images\Trypophobic16.tif'	Holes	1	1	0	0	1.41881	11.7149
2027	35	'Images\Trypophobic6.tif'	Holes	3	3	-1	1	-15.0342	-5.6259
2027	36	'Images\Trypophobic5.tif'	Holes	1	1	2	2	-19.8916	-11.3712
2027	37	'Images\spider8.tif'	Threat	7	7	-3	3	11.9716	19.6041
2027	38	'Images\Foveating (8).tif'	Control	1	1	0	0	1.10338	11.3995
2027	39	'Images\Foveating (18).tif'	Control	1	1	0	0	-10.2417	0.05445
2027	40	'Images\Foveating (5).tif'	Control	1	1	0	0	-12.219	-1.92293
2027	41	'Images\Foveating (12).tif'	Control	1	1	0	0	-10.9748	-0.67873
2027	42	'Images\Trypophobic11.tif'	Holes	1	1	0	0	-5.14094	5.15518
2027	43	'Images\Foveating (6).tif'	Control	1	1	0	0	12.5068	22.803
2027	44	'Images\Foveating (16).tif'	Control	1	1	0	0	4.50118	14.7973
2027	45	'Images\Foveating (17).tif'	Control	1	1	0	0	-7.22901	3.06711
2027	46	'Images\snake26.tif'	Threat	7	7	-3	3	10.8729	18.5054
2027	47	'Images\Foveating (10).tif'	Control	1	1	0	0	2.52521	12.8213
2027	48	'Images\spider29.tif'	Threat	7	7	-3	3	-4.43652	3.19603
2027	49	'Images\Trypophobic2.tif'	Holes	1	1	1	1	-8.64905	0.75921
2027	50	'Images\spider55.tif'	Threat	6	6	-3	3	10.7032	18.3358
2027	51	'Images\Trypophobic18.tif'	Holes	2	3	-1	1	2.25947	11.6677
2027	52	'Images\Foveating (9).tif'	Control	1	1	0	0	3.71561	14.0117
2027	53	'Images\Foveating (3).tif'	Control	1	1	0	0	8.47185	18.768
2027	54	'Images\snake4.tif'	Threat	7	7	-3	3	19.1285	26.7611
2027	55	'Images\Trypophobic20.tif'	Holes	1	2	0	0	0.495198	10.7913
2027	56	'Images\spider21.tif'	Threat	7	7	-3	3	3.10685	10.7394
2027	57	'Images\Trypophobic9.tif'	Holes	3	3	-1	1	0.651872	10.0601
2027	58	'Images\Trypophobic4.tif'	Holes	4	4	-1	1	-5.87068	3.53758
2027	59	'Images\Foveating (14).tif'	Control	1	1	0	0	12.4986	22.7947
2027	60	'Images\Trypophobic15.tif'	Holes	2	2	0	0	-11.73	-1.43387
2028	1	'Images\Trypophobic14.tif'	Holes	1	5	-2	2	-31.3384	-22.818
2028	2	'Images\Foveating (18).tif'	Control	1	1	0	0	-38.4825	-28.1864
2028	3	'Images\Trypophobic17.tif'	Holes	5	7	-3	3	-30.1805	-22.5479
2028	4	'Images\Trypophobic15.tif'	Holes	3	6	-3	3	-46.4248	-38.7923
2028	5	'Images\Trypophobic12.tif'	Holes	1	3	-1	1	-42.0224	-32.6141
2028	6	'Images\Foveating (4).tif'	Control	1	1	0	0	-20.3342	-10.0381
2028	7	'Images\Trypophobic3.tif'	Holes	3	6	-2	2	-1.40675	7.11365
2028	8	'Images\Foveating (13).tif'	Control	1	1	0	0	-21.4721	-11.176
2028	9	'Images\Trypophobic9.tif'	Holes	2	6	-2	2	13.7892	22.3097
2028	10	'Images\snake28.tif'	Threat	5	5	-2	2	-37.4957	-28.9753
2028	11	'Images\Trypophobic4.tif'	Holes	3	6	-3	3	-27.5266	-19.8941
2028	12	'Images\Foveating (17).tif'	Control	1	1	0	0	-1.42844	8.86767
2028	13	'Images\Foveating (9).tif'	Control	1	1	0	0	-37.8271	-27.531
2028	14	'Images\Trypophobic11.tif'	Holes	2	6	-2	2	-5.97253	2.54787
2028	15	'Images\snake22.tif'	Threat	5	4	-2	2	-43.1456	-34.6252
2028	16	'Images\Trypophobic7.tif'	Holes	1	1	0	0	28.9084	39.2045
2028	17	'Images\Trypophobic13.tif'	Holes	2	4	-2	2	19.8726	28.393
2028	18	'Images\Trypophobic6.tif'	Holes	3	6	-3	3	-29.9877	-22.3551
2028	19	'Images\snake25.tif'	Threat	3	4	-2	2	-40.5332	-32.0128
2028	20	'Images\Foveating (12).tif'	Control	1	1	0	0	-18.0554	-7.75924
2028	21	'Images\spider24.tif'	Threat	3	2	-1	1	-6.17023	3.23803
2028	22	'Images\snake32.tif'	Threat	5	4	-3	3	-21.2813	-13.6487
2028	23	'Images\spider29.tif'	Threat	5	7	-3	3	7.43985	15.0724
2028	24	'Images\Trypophobic1.tif'	Holes	1	2	-1	1	21.1228	30.531
2028	25	'Images\Trypophobic20.tif'	Holes	1	5	-2	2	-40.2155	-31.6951
2028	26	'Images\spider21.tif'	Threat	4	5	-2	2	-18.6173	-10.0969
2028	27	'Images\snake40.tif'	Threat	4	7	-3	3	-28.1521	-20.5196
2028	28	'Images\spider14.tif'	Threat	4	3	-2	2	-0.367574	8.15283
2028	29	'Images\Trypophobic18.tif'	Holes	6	5	-2	2	-36.9703	-28.4499
2028	30	'Images\Foveating (3).tif'	Control	1	1	0	0	2.19488	12.491
2028	31	'Images\Foveating (14).tif'	Control	1	1	0	0	-5.96114	4.33497
2028	32	'Images\spider22.tif'	Threat	3	3	-2	2	11.8348	20.3552
2028	33	'Images\Foveating (15).tif'	Control	1	1	0	0	-5.14478	5.15133
2028	34	'Images\Foveating (10).tif'	Control	1	1	0	0	-5.353	4.94311
2028	35	'Images\spider55.tif'	Threat	3	3	-1	1	22.5543	31.9625
2028	36	'Images\Foveating (20).tif'	Control	2	2	-1	1	-26.7789	-17.3706
2028	37	'Images\Trypophobic2.tif'	Holes	3	5	-2	2	-41.7201	-33.1997
2028	38	'Images\spider32.tif'	Threat	3	4	-2	2	31.801	40.3214
2028	39	'Images\Foveating (8).tif'	Control	1	1	0	0	6.50306	16.7992
2028	40	'Images\Trypophobic8.tif'	Holes	2	6	-3	3	-37.5262	-29.8937
2028	41	'Images\Trypophobic10.tif'	Holes	3	4	-2	2	2.95292	11.4733
2028	42	'Images\Trypophobic16.tif'	Holes	1	1	-2	2	-26.1996	-17.6792
2028	43	'Images\Trypophobic19.tif'	Holes	7	7	-3	3	-25.4033	-17.7707
2028	44	'Images\snake41.tif'	Threat	5	5	-2	2	-18.1629	-9.64254
2028	45	'Images\Foveating (2).tif'	Control	1	1	0	0	-15.7034	-5.40725
2028	46	'Images\snake4.tif'	Threat	3	5	-2	2	4.59306	13.1135
2028	47	'Images\Foveating (6).tif'	Control	2	1	-2	2	-5.3922	3.1282
2028	48	'Images\snake43.tif'	Threat	5	4	-2	2	-17.0429	-8.52248
2028	49	'Images\Foveating (11).tif'	Control	1	1	0	0	-0.310254	9.98586
2028	50	'Images\Foveating (5).tif'	Control	1	1	0	0	11.1502	21.4463
2028	51	'Images\spider8.tif'	Threat	4	5	-2	2	-11.8314	-3.31098
2028	52	'Images\Foveating (19).tif'	Control	1	1	0	0	-39.1711	-28.875
2028	53	'Images\Trypophobic5.tif'	Holes	3	4	-1	1	-41.927	-32.5188
2028	54	'Images\snake26.tif'	Threat	3	3	-2	2	-4.67734	3.84306
2028	55	'Images\spider1.tif'	Threat	3	6	-2	2	26.6143	35.1347
2028	56	'Images\Foveating (16).tif'	Control	1	1	0	0	-1.13116	9.16496
2028	57	'Images\snake57.tif'	Threat	5	4	-1	1	-38.6412	-29.2329
2028	58	'Images\Foveating (7).tif'	Control	1	1	0	0	-23.5117	-13.2156
2028	59	'Images\spider42.tif'	Threat	3	2	-1	1	-18.7872	-9.37893
2028	60	'Images\Foveating (1).tif'	Control	1	1	0	0	42.4364	52.7325
2029	1	'Images\snake4.tif'	Threat	3	6	-2	2	1.33427	9.85468
2029	2	'Images\Trypophobic6.tif'	Holes	2	6	-3	3	-32.6576	-25.025
2029	3	'Images\Foveating (2).tif'	Control	1	1	0	0	-24.6405	-14.3444
2029	4	'Images\Trypophobic9.tif'	Holes	2	6	-3	3	-16.691	-9.05847
2029	5	'Images\Foveating (3).tif'	Control	1	1	0	0	-23.7206	-13.4245
2029	6	'Images\Foveating (12).tif'	Control	1	1	0	0	-47.7095	-37.4134
2029	7	'Images\Trypophobic10.tif'	Holes	5	7	-3	3	-3.24107	4.39148
2029	8	'Images\snake57.tif'	Threat	3	2	-2	2	-33.7043	-25.1839
2029	9	'Images\snake40.tif'	Threat	2	1	0	0	-12.0303	-1.73418
2029	10	'Images\Foveating (4).tif'	Control	1	1	1	1	-18.9559	-9.54761
2029	11	'Images\Trypophobic17.tif'	Holes	2	7	-3	3	-32.0186	-24.3861
2029	12	'Images\snake25.tif'	Threat	5	6	-3	3	-37.631	-29.9984
2029	13	'Images\Foveating (17).tif'	Control	1	1	-1	1	-47.005	-37.5967
2029	14	'Images\spider1.tif'	Threat	4	6	-3	3	-31.1782	-23.5457
2029	15	'Images\Foveating (15).tif'	Control	1	1	0	0	-37.9693	-27.6732
2029	16	'Images\Trypophobic18.tif'	Holes	5	7	-3	3	-39.7262	-32.0937
2029	17	'Images\spider14.tif'	Threat	4	6	-3	3	-23.7468	-16.1143
2029	18	'Images\spider8.tif'	Threat	5	7	-3	3	-46.958	-39.3255
2029	19	'Images\Foveating (9).tif'	Control	1	1	0	0	-40.8458	-30.5497
2029	20	'Images\Foveating (5).tif'	Control	1	1	0	0	-26.9796	-16.6835
2029	21	'Images\Foveating (16).tif'	Control	1	1	0	0	-25.455	-15.1589
2029	22	'Images\spider32.tif'	Threat	6	7	-3	3	-39.4658	-31.8333
2029	23	'Images\Trypophobic16.tif'	Holes	1	4	-2	2	-40.4977	-31.9773
2029	24	'Images\spider24.tif'	Threat	6	7	-3	3	17.6643	25.2968
2029	25	'Images\Foveating (6).tif'	Control	1	1	-1	1	10.717	20.1252
2029	26	'Images\Foveating (11).tif'	Control	1	1	-1	1	-0.523238	8.88502
2029	27	'Images\Trypophobic8.tif'	Holes	1	4	-2	2
2029	28	'Images\Foveating (18).tif'	Control	1	1	-1	1
2029	29	'Images\spider22.tif'	Threat	4	5	-3	3	25.5394	33.1719
2029	30	'Images\Trypophobic13.tif'	Holes	1	5	-3	3	-52.8611	-45.2286
2029	31	'Images\Trypophobic5.tif'	Holes	1	5	-2	2	-54.0863	-45.566
2029	32	'Images\Foveating (7).tif'	Control	1	1	-1	1
2029	33	'Images\Trypophobic7.tif'	Holes	2	4	-2	2
2029	34	'Images\snake26.tif'	Threat	2	1	-1	1
2029	35	'Images\Foveating (19).tif'	Control	1	1	0	0
2029	36	'Images\Foveating (10).tif'	Control	1	1	-1	1
2029	37	'Images\spider29.tif'	Threat	6	7	-3	3
2029	38	'Images\Foveating (13).tif'	Control	1	1	0	0
2029	39	'Images\Trypophobic15.tif'	Holes	3	7	-3	3
2029	40	'Images\Foveating (1).tif'	Control	1	1	0	0
2029	41	'Images\Trypophobic14.tif'	Holes	3	6	-2	2
2029	42	'Images\snake43.tif'	Threat	2	1	-1	1
2029	43	'Images\spider55.tif'	Threat	3	5	-2	2
2029	44	'Images\Trypophobic19.tif'	Holes	2	6	-3	3
2029	45	'Images\Trypophobic2.tif'	Holes	1	4	-2	2	-27.7056	-19.1852
2029	46	'Images\Trypophobic20.tif'	Holes	2	7	-3	3	-41.236	-33.6034
2029	47	'Images\snake41.tif'	Threat	3	2	-1	1	-54.6169	-45.2086
2029	48	'Images\Trypophobic3.tif'	Holes	5	7	-3	3	-33.491	-25.8585
2029	49	'Images\Foveating (8).tif'	Control	1	1	0	0	-39.1797	-28.8836
2029	50	'Images\Trypophobic1.tif'	Holes	1	7	-3	3	-14.5168	-6.88424
2029	51	'Images\snake28.tif'	Threat	5	2	-1	1	-37.4584	-28.0501
2029	52	'Images\Trypophobic12.tif'	Holes	1	1	0	0	-39.8762	-29.58
2029	53	'Images\Foveating (20).tif'	Control	1	1	0	0
2029	54	'Images\spider21.tif'	Threat	5	7	-3	3	-20.5741	-12.9415
2029	55	'Images\snake22.tif'	Threat	3	4	-2	2	-42.5055	-33.9851
2029	56	'Images\spider42.tif'	Threat	4	7	-3	3	-41.9184	-34.2859
2029	57	'Images\Trypophobic11.tif'	Holes	5	6	-2	2
2029	58	'Images\Foveating (14).tif'	Control	1	1	0	0	36.7161	47.0122
2029	59	'Images\snake32.tif'	Threat	3	4	-1	1	3.56872	12.977
2029	60	'Images\Trypophobic4.tif'	Holes	5	7	-3	3	-56.3226	-48.6901
2030	1	'Images\snake28.tif'	Threat	4	2	-2	2	-21.1403	-12.6199
2030	2	'Images\spider8.tif'	Threat	5	4	-2	2	9.10142	17.6218
2030	3	'Images\Foveating (13).tif'	Control	1	1	0	0	-34.0503	-23.7542
2030	4	'Images\Trypophobic1.tif'	Holes	1	1	0	0	-20.513	-10.2169
2030	5	'Images\Foveating (15).tif'	Control	1	1	0	0	5.38688	15.683
2030	6	'Images\Foveating (10).tif'	Control	1	1	0	0	-13.3916	-3.09548
2030	7	'Images\Trypophobic19.tif'	Holes	1	1	0	0	-17.417	-7.12089
2030	8	'Images\Foveating (17).tif'	Control	1	1	0	0	-21.5307	-11.2346
2030	9	'Images\spider32.tif'	Threat	2	4	-1	1	-10.3315	-0.92324
2030	10	'Images\Foveating (12).tif'	Control	1	1	0	0	-32.3092	-22.0131
2030	11	'Images\snake25.tif'	Threat	3	2	-2	2	-12.7901	-4.26973
2030	12	'Images\Trypophobic9.tif'	Holes	1	1	0	0	10.3607	20.6568
2030	13	'Images\Foveating (18).tif'	Control	1	1	0	0	-28.0413	-17.7452
2030	14	'Images\Trypophobic5.tif'	Holes	1	1	0	0	-15.2977	-5.00161
2030	15	'Images\Foveating (11).tif'	Control	1	1	0	0	-5.53558	4.76053
2030	16	'Images\spider29.tif'	Threat	4	2	-1	1	-4.5319	4.87636
2030	17	'Images\Trypophobic13.tif'	Holes	1	1	0	0	-0.980371	9.31574
2030	18	'Images\spider24.tif'	Threat	3	4	-1	1	-14.2722	-4.86392
2030	19	'Images\Trypophobic2.tif'	Holes	1	1	1	1	-11.0694	-1.66117
2030	20	'Images\Foveating (19).tif'	Control	1	1	0	0	-7.29038	3.00574
2030	21	'Images\Foveating (6).tif'	Control	1	1	0	0	-25.6256	-15.3295
2030	22	'Images\snake22.tif'	Threat	2	1	0	0	-9.28941	1.00671
2030	23	'Images\Trypophobic17.tif'	Holes	1	1	0	0	-31.7647	-21.4686
2030	24	'Images\Trypophobic3.tif'	Holes	1	1	0	0	-3.97515	6.32096
2030	25	'Images\Trypophobic14.tif'	Holes	1	1	0	0	-0.332016	9.9641
2030	26	'Images\Trypophobic11.tif'	Holes	1	1	1	1	-1.36155	8.04671
2030	27	'Images\snake4.tif'	Threat	3	1	-1	1	13.8508	23.259
2030	28	'Images\Foveating (16).tif'	Control	1	1	0	0	-7.71781	2.5783
2030	29	'Images\Foveating (8).tif'	Control	1	1	0	0	-16.9878	-6.69165
2030	30	'Images\Trypophobic6.tif'	Holes	1	1	0	0	-32.0318	-21.7357
2030	31	'Images\snake32.tif'	Threat	3	2	-1	1	-22.1451	-12.7368
2030	32	'Images\Foveating (3).tif'	Control	1	1	0	0	26.48	36.7761
2030	33	'Images\Trypophobic12.tif'	Holes	1	1	2	2	0.473833	8.99423
2030	34	'Images\snake41.tif'	Threat	3	1	-1	1	-14.3057	-4.89745
2030	35	'Images\snake57.tif'	Threat	3	2	-1	1	-0.34024	9.06802
2030	36	'Images\Foveating (1).tif'	Control	1	1	0	0	-1.13082	9.1653
2030	37	'Images\spider21.tif'	Threat	2	4	-1	1	-26.3066	-16.8983
2030	38	'Images\spider55.tif'	Threat	2	4	-1	1	68.8067	78.2149
2030	39	'Images\spider14.tif'	Threat	3	2	-2	2	-16.8941	-8.37373
2030	40	'Images\Foveating (7).tif'	Control	1	1	0	0	-12.062	-1.76586
2030	41	'Images\Foveating (2).tif'	Control	1	1	0	0	-13.6906	-3.39445
2030	42	'Images\Trypophobic15.tif'	Holes	1	1	0	0	-21.1623	-10.8662
2030	43	'Images\spider42.tif'	Threat	3	4	-1	1	-13.2857	-3.87745
2030	44	'Images\spider1.tif'	Threat	4	4	-1	1	2.54302	11.9513
2030	45	'Images\Trypophobic8.tif'	Holes	1	1	1	1	4.19691	13.6052
2030	46	'Images\Trypophobic16.tif'	Holes	1	1	1	1	-1.99662	7.41164
2030	47	'Images\Trypophobic18.tif'	Holes	1	2	0	0	-3.76041	6.53571
2030	48	'Images\snake40.tif'	Threat	4	2	-2	2	-25.6056	-17.0852
2030	49	'Images\Trypophobic20.tif'	Holes	1	1	0	0	-12.1353	-1.83918
2030	50	'Images\spider22.tif'	Threat	2	3	-1	1	-16.5526	-7.14435
2030	51	'Images\Foveating (20).tif'	Control	1	1	0	0	-3.77253	6.52358
2030	52	'Images\snake43.tif'	Threat	4	2	-1	1	-13.5229	-4.11468
2030	53	'Images\Foveating (5).tif'	Control	1	1	0	0	18.8174	29.1136
2030	54	'Images\snake26.tif'	Threat	3	2	-1	1	-16.2877	-6.87941
2030	55	'Images\Trypophobic10.tif'	Holes	1	1	0	0	-26.7903	-16.4942
2030	56	'Images\Trypophobic4.tif'	Holes	1	2	0	0	5.49376	15.7899
2030	57	'Images\Foveating (14).tif'	Control	1	1	0	0	2.93086	13.227
2030	58	'Images\Trypophobic7.tif'	Holes	1	1	0	0	14.7354	25.0315
2030	59	'Images\Foveating (4).tif'	Control	1	1	0	0	-25.2022	-14.9061
2030	60	'Images\Foveating (9).tif'	Control	1	1	0	0	47.4277	57.7238
2031	1	'Images\Trypophobic15.tif'	Holes	1	1	0	0	-35.6083	-25.3122
2031	2	'Images\Foveating (9).tif'	Control	1	1	0	0	-18.451	-8.15493
2031	3	'Images\snake32.tif'	Threat	3	2	0	0	-9.30927	0.98684
2031	4	'Images\Trypophobic5.tif'	Holes	1	1	1	1	-10.0831	-0.67483
2031	5	'Images\Foveating (18).tif'	Control	1	1	0	0	-8.66282	1.63329
2031	6	'Images\snake43.tif'	Threat	1	1	-1	1	-22.64	-13.2317
2031	7	'Images\Foveating (7).tif'	Control	1	1	0	0	-16.2235	-5.92735
2031	8	'Images\snake28.tif'	Threat	3	1	0	0	-15.7349	-5.43878
2031	9	'Images\Trypophobic10.tif'	Holes	1	1	0	0	10.5165	20.8126
2031	10	'Images\snake26.tif'	Threat	1	1	-1	1	-22.8836	-13.4754
2031	11	'Images\snake4.tif'	Threat	2	3	-1	1	-2.88379	6.52447
2031	12	'Images\spider1.tif'	Threat	4	3	-1	1	-5.38049	4.02777
2031	13	'Images\spider32.tif'	Threat	2	3	-1	1	-19.2851	-9.87688
2031	14	'Images\Trypophobic8.tif'	Holes	1	1	0	0	-4.10644	6.18967
2031	15	'Images\Trypophobic14.tif'	Holes	1	1	0	0	-9.7603	0.53581
2031	16	'Images\Foveating (14).tif'	Control	1	1	0	0	12.5284	22.8245
2031	17	'Images\Trypophobic19.tif'	Holes	1	2	-1	1	-24.6272	-15.2189
2031	18	'Images\snake22.tif'	Threat	4	3	-1	1	-19.1771	-9.76884
2031	19	'Images\Trypophobic16.tif'	Holes	1	1	0	0	5.23849	15.5346
2031	20	'Images\Foveating (13).tif'	Control	1	1	0	0	-13.8363	-3.54022
2031	21	'Images\Trypophobic9.tif'	Holes	1	1	0	0	-0.263344	10.0328
2031	22	'Images\Trypophobic20.tif'	Holes	1	1	0	0	-7.47703	2.81909
2031	23	'Images\Trypophobic2.tif'	Holes	1	1	0	0	1.01438	11.3105
2031	24	'Images\Foveating (4).tif'	Control	1	1	0	0	-23.2211	-12.925
2031	25	'Images\Trypophobic17.tif'	Holes	1	2	0	0	-24.4341	-14.138
2031	26	'Images\Foveating (3).tif'	Control	1	1	0	0	-3.38334	6.91277
2031	27	'Images\Foveating (8).tif'	Control	1	1	0	0	21.65	31.9461
2031	28	'Images\spider29.tif'	Threat	4	5	-2	2	-12.9204	-4.40003
2031	29	'Images\Foveating (19).tif'	Control	1	1	0	0	-23.5306	-13.2345
2031	30	'Images\Foveating (10).tif'	Control	1	1	0	0	-9.92399	0.37212
2031	31	'Images\Trypophobic4.tif'	Holes	1	1	0	0	-5.96668	4.32943
2031	32	'Images\spider8.tif'	Threat	2	3	-2	2	20.5738	29.0942
2031	33	'Images\spider24.tif'	Threat	4	4	-2	2	-21.5174	-12.997
2031	34	'Images\Trypophobic18.tif'	Holes	1	2	-1	1	23.4004	32.8087
2031	35	'Images\Foveating (11).tif'	Control	1	1	0	0	-24.1245	-13.8284
2031	36	'Images\Foveating (12).tif'	Control	1	1	0	0	-29.84	-19.5439
2031	37	'Images\Foveating (16).tif'	Control	1	1	0	0	-3.94705	6.34906
2031	38	'Images\Trypophobic6.tif'	Holes	1	1	0	0	-23.0768	-12.7807
2031	39	'Images\spider14.tif'	Threat	3	4	-2	2	-24.1357	-15.6153
2031	40	'Images\Trypophobic3.tif'	Holes	1	2	0	0	21.4466	31.7427
2031	41	'Images\Foveating (20).tif'	Control	1	1	0	0	-25.7861	-15.49
2031	42	'Images\Foveating (5).tif'	Control	1	1	0	0	26.6574	36.9535
2031	43	'Images\spider55.tif'	Threat	4	4	-2	2	23.4654	31.9858
2031	44	'Images\Foveating (6).tif'	Control	1	1	0	0	-14.506	-4.20984
2031	45	'Images\spider22.tif'	Threat	4	4	-2	2	5.60589	14.1263
2031	46	'Images\snake41.tif'	Threat	1	2	-1	1	-24.907	-15.4987
2031	47	'Images\Trypophobic12.tif'	Holes	1	1	0	0	-26.2583	-15.9621
2031	48	'Images\spider42.tif'	Threat	4	4	-2	2	12.9655	21.4859
2031	49	'Images\Foveating (2).tif'	Control	1	1	0	0	-4.03285	6.26326
2031	50	'Images\Trypophobic11.tif'	Holes	1	1	0	0	-13.8222	-3.52613
2031	51	'Images\Trypophobic1.tif'	Holes	1	1	0	0	6.39036	16.6865
2031	52	'Images\snake57.tif'	Threat	-1	3	-1	1	-0.111128	9.29713
2031	53	'Images\snake25.tif'	Threat	4	3	-1	1	-16.4311	-7.02281
2031	54	'Images\snake40.tif'	Threat	2	4	-1	1	-0.0220274	9.38623
2031	55	'Images\Foveating (17).tif'	Control	1	1	0	0	-29.999	-19.7029
2031	56	'Images\Trypophobic7.tif'	Holes	1	1	0	0	8.05481	18.3509
2031	57	'Images\Trypophobic13.tif'	Holes	1	1	0	0	-15.0012	-4.70507
2031	58	'Images\spider21.tif'	Threat	4	4	-2	2	-25.907	-17.3866
2031	59	'Images\Foveating (15).tif'	Control	1	1	0	0	-2.48818	7.80794
2031	60	'Images\Foveating (1).tif'	Control	1	1	0	0	-26.8585	-16.5624
2032	1	'Images\spider14.tif'	Threat	2	5	0	0	2.58915	12.8853
2032	2	'Images\Trypophobic19.tif'	Holes	1	2	0	0	-0.0883599	10.2078
2032	3	'Images\Foveating (14).tif'	Control	1	1	0	0	-6.37935	3.91676
2032	4	'Images\Foveating (6).tif'	Control	1	1	0	0	-2.70775	7.58837
2032	5	'Images\Trypophobic10.tif'	Holes	1	1	0	0	-10.5348	-0.23873
2032	6	'Images\snake26.tif'	Threat	1	1	0	0	-18.1196	-7.8235
2032	7	'Images\spider42.tif'	Threat	2	5	-1	1	-17.5952	-8.18697
2032	8	'Images\snake57.tif'	Threat	1	1	0	0	6.21737	16.5135
2032	9	'Images\Foveating (10).tif'	Control	1	1	0	0	-19.0485	-8.75238
2032	10	'Images\spider8.tif'	Threat	2	7	-1	1	-11.3336	-1.9253
2032	11	'Images\Trypophobic2.tif'	Holes	1	1	0	0	-20.295	-9.99884
2032	12	'Images\Foveating (11).tif'	Control	1	1	0	0	-19.0668	-8.77069
2032	13	'Images\Foveating (13).tif'	Control	1	1	0	0	-10.189	0.10713
2032	14	'Images\Trypophobic7.tif'	Holes	1	1	0	0	-26.5301	-16.234
2032	15	'Images\Foveating (3).tif'	Control	1	1	0	0	-19.3321	-9.03595
2032	16	'Images\Trypophobic20.tif'	Holes	1	1	0	0	-17.6671	-7.37102
2032	17	'Images\Foveating (15).tif'	Control	1	1	0	0	-0.670838	9.62528
2032	18	'Images\spider1.tif'	Threat	3	5	-1	1	0.342982	9.75124
2032	19	'Images\snake25.tif'	Threat	2	1	0	0	-18.527	-8.23089
2032	20	'Images\Trypophobic1.tif'	Holes	1	1	0	0	-22.388	-12.0919
2032	21	'Images\spider29.tif'	Threat	2	7	-1	1	-12.5908	-3.1825
2032	22	'Images\Trypophobic15.tif'	Holes	1	1	-1	1	-25.4891	-16.0809
2032	23	'Images\Trypophobic18.tif'	Holes	1	2	0	0	-37.5609	-27.2648
2032	24	'Images\snake40.tif'	Threat	1	1	0	0	-26.2725	-15.9763
2032	25	'Images\Trypophobic6.tif'	Holes	1	1	0	0	-11.9749	-1.67875
2032	26	'Images\Foveating (1).tif'	Control	1	1	0	0	1.68205	11.9782
2032	27	'Images\snake43.tif'	Threat	1	1	0	0	-11.1654	-0.86929
2032	28	'Images\spider55.tif'	Threat	3	5	-1	1	9.98549	19.3938
2032	29	'Images\Foveating (9).tif'	Control	1	1	0	0	-27.8933	-17.5972
2032	30	'Images\Trypophobic12.tif'	Holes	1	1	0	0	-16.4541	-6.15798
2032	31	'Images\Foveating (5).tif'	Control	1	1	0	0	-16.7369	-6.44083
2032	32	'Images\Trypophobic5.tif'	Holes	1	1	-1	1	-38.9781	-29.5698
2032	33	'Images\spider22.tif'	Threat	3	4	-1	1	14.8853	24.2936
2032	34	'Images\Foveating (17).tif'	Control	1	1	0	0	-10.8886	-0.59244
2032	35	'Images\Foveating (12).tif'	Control	1	1	-1	1	10.3227	19.7309
2032	36	'Images\Trypophobic3.tif'	Holes	1	1	1	1	-34.0595	-24.6513
2032	37	'Images\spider24.tif'	Threat	1	6	0	0	-10.4525	-0.15641
2032	38	'Images\Trypophobic4.tif'	Holes	1	1	-1	1	-30.5304	-21.1221
2032	39	'Images\spider32.tif'	Threat	2	6	-1	1	-19.2783	-9.87001
2032	40	'Images\snake32.tif'	Threat	1	1	0	0	-26.3225	-16.0264
2032	41	'Images\snake28.tif'	Threat	1	1	0	0	-29.5711	-19.275
2032	42	'Images\snake4.tif'	Threat	1	1	0	0	7.65065	17.9468
2032	43	'Images\spider21.tif'	Threat	2	6	-1	1	-35.9711	-26.5629
2032	44	'Images\Trypophobic13.tif'	Holes	1	1	0	0	-39.2527	-28.9566
2032	45	'Images\Foveating (2).tif'	Control	1	1	0	0	-1.8185	8.47761
2032	46	'Images\Foveating (16).tif'	Control	1	1	0	0	-18.0918	-7.79572
2032	47	'Images\Foveating (18).tif'	Control	1	1	0	0	-7.42765	2.86846
2032	48	'Images\Trypophobic14.tif'	Holes	1	1	0	0	-35.3669	-25.0708
2032	49	'Images\Foveating (8).tif'	Control	1	1	0	0	-12.4022	-2.10608
2032	50	'Images\Trypophobic11.tif'	Holes	1	1	1	1	-15.8759	-6.46766
2032	51	'Images\Foveating (7).tif'	Control	1	1	0	0	-5.675	4.62112
2032	52	'Images\Foveating (19).tif'	Control	1	1	0	0	-15.3421	-5.04596
2032	53	'Images\snake22.tif'	Threat	1	1	0	0	-26.6536	-16.3575
2032	54	'Images\snake41.tif'	Threat	2	4	0	0	-22.6703	-12.3742
2032	55	'Images\Foveating (20).tif'	Control	1	1	0	0	-25.9043	-15.6082
2032	56	'Images\Trypophobic16.tif'	Holes	1	1	0	0	-21.2952	-10.9991
2032	57	'Images\Trypophobic17.tif'	Holes	1	1	0	0	-23.5351	-13.239
2032	58	'Images\Trypophobic8.tif'	Holes	1	1	0	0	-10.3099	-0.01381
2032	59	'Images\Foveating (4).tif'	Control	1	1	0	0	-9.83675	0.45936
2032	60	'Images\Trypophobic9.tif'	Holes	1	1	0	0	-13.3519	-3.05574
2033	1	'Images\Trypophobic14.tif'	Holes	3	2	-1	1	-31.1583	-21.75
2033	2	'Images\Foveating (17).tif'	Control	1	1	0	0	-16.1846	-5.88847
2033	3	'Images\Foveating (14).tif'	Control	1	1	0	0	-2.57593	7.72019
2033	4	'Images\Foveating (19).tif'	Control	1	1	0	0	4.40011	14.6962
2033	5	'Images\snake57.tif'	Threat	6	5	-2	2	-6.3502	2.1702
2033	6	'Images\spider1.tif'	Threat	5	6	-2	2	19.8939	28.4143
2033	7	'Images\spider14.tif'	Threat	6	6	-2	2	-6.61262	1.90778
2033	8	'Images\snake28.tif'	Threat	5	5	-2	2	-0.185144	8.33526
2033	9	'Images\Trypophobic1.tif'	Holes	4	4	-1	1	7.59114	16.9994
2033	10	'Images\snake26.tif'	Threat	5	6	-2	2	1.39363	9.91403
2033	11	'Images\Foveating (16).tif'	Control	1	1	0	0	-1.47725	8.81886
2033	12	'Images\Trypophobic7.tif'	Holes	4	2	-1	1	6.29148	15.6997
2033	13	'Images\Foveating (6).tif'	Control	1	1	0	0	-11.7087	-1.41259
2033	14	'Images\Trypophobic11.tif'	Holes	3	3	-1	1	-6.04463	3.36363
2033	15	'Images\Foveating (1).tif'	Control	1	1	0	0	3.73487	14.031
2033	16	'Images\Foveating (8).tif'	Control	1	1	0	0	9.99566	20.2918
2033	17	'Images\spider21.tif'	Threat	5	6	-2	2	-1.89924	6.62117
2033	18	'Images\spider42.tif'	Threat	5	4	-2	2	-21.7154	-13.195
2033	19	'Images\snake43.tif'	Threat	5	6	-2	2	11.3429	19.8633
2033	20	'Images\Foveating (15).tif'	Control	1	1	0	0	-11.9917	-1.69561
2033	21	'Images\Trypophobic4.tif'	Holes	5	6	-2	2	-16.4216	-7.90121
2033	22	'Images\Foveating (18).tif'	Control	1	1	0	0	-21.7671	-11.471
2033	23	'Images\snake32.tif'	Threat	6	5	-2	2	32.3552	40.8757
2033	24	'Images\snake4.tif'	Threat	5	6	-2	2	5.36221	13.8826
2033	25	'Images\Trypophobic20.tif'	Holes	2	2	0	0	-4.19258	6.10353
2033	26	'Images\Trypophobic12.tif'	Holes	1	1	0	0	-3.33044	6.96567
2033	27	'Images\Trypophobic16.tif'	Holes	1	1	0	0	4.9331	15.2292
2033	28	'Images\Foveating (11).tif'	Control	1	1	0	0	8.74607	19.0422
2033	29	'Images\Trypophobic2.tif'	Holes	1	1	0	0	-27.2503	-16.9542
2033	30	'Images\spider32.tif'	Threat	5	5	-2	2	0.773117	9.29352
2033	31	'Images\Foveating (7).tif'	Control	1	1	0	0	48.6385	58.9346
2033	32	'Images\spider55.tif'	Threat	6	6	-2	2	12.0726	20.593
2033	33	'Images\Foveating (12).tif'	Control	1	1	0	0	1.51544	11.8116
2033	34	'Images\Foveating (5).tif'	Control	1	1	0	0	3.53165	13.8278
2033	35	'Images\Foveating (13).tif'	Control	1	1	0	0	-1.74839	8.54772
2033	36	'Images\Trypophobic5.tif'	Holes	2	3	0	0	-34.6626	-24.3665
2033	37	'Images\Trypophobic9.tif'	Holes	6	6	-2	2	13.2564	21.7768
2033	38	'Images\Foveating (4).tif'	Control	1	1	0	0	0.0800603	10.3762
2033	39	'Images\Trypophobic19.tif'	Holes	4	4	-2	2	10.4134	18.9338
2033	40	'Images\Trypophobic13.tif'	Holes	1	1	0	0	-21.1622	-10.8661
2033	41	'Images\Foveating (2).tif'	Control	1	1	0	0	-1.3243	8.97182
2033	42	'Images\Trypophobic8.tif'	Holes	1	1	0	0	-1.49201	8.8041
2033	43	'Images\snake22.tif'	Threat	6	6	-2	2	2.66706	11.1875
2033	44	'Images\Trypophobic6.tif'	Holes	4	4	-1	1	2.52167	11.9299
2033	45	'Images\spider22.tif'	Threat	5	5	-2	2	13.0236	21.544
2033	46	'Images\Trypophobic17.tif'	Holes	5	5	-2	2	-6.68796	1.83244
2033	47	'Images\Foveating (9).tif'	Control	1	1	0	0	4.64868	14.9448
2033	48	'Images\snake25.tif'	Threat	5	1	0	0	1.13293	11.429
2033	49	'Images\snake41.tif'	Threat	5	5	-2	2	4.65721	13.1776
2033	50	'Images\spider24.tif'	Threat	6	6	-2	2	12.1554	20.6758
2033	51	'Images\Foveating (10).tif'	Control	1	1	0	0	2.99937	13.2955
2033	52	'Images\Trypophobic18.tif'	Holes	6	5	-2	2	-13.0539	-4.53348
2033	53	'Images\Trypophobic10.tif'	Holes	1	1	-1	1	5.86426	15.2725
2033	54	'Images\Trypophobic15.tif'	Holes	2	3	-1	1	-16.704	-7.29572
2033	55	'Images\snake40.tif'	Threat	6	5	-2	2	-20.0579	-11.5375
2033	56	'Images\spider8.tif'	Threat	6	6	-3	3	25.5068	33.1394
2033	57	'Images\Foveating (3).tif'	Control	1	1	0	0	0.0881834	10.3843
2033	58	'Images\Foveating (20).tif'	Control	1	1	0	0	-4.26078	6.03534
2033	59	'Images\spider29.tif'	Threat	5	6	-2	2	-11.1797	-2.6593
2033	60	'Images\Trypophobic3.tif'	Holes	5	5	-2	2	20.0369	28.5573
2034	1	'Images\Trypophobic1.tif'	Holes	2	2	-1	1	-7.92421	1.48405
2034	2	'Images\Trypophobic12.tif'	Holes	1	1	0	0	-23.5988	-13.3027
2034	3	'Images\spider32.tif'	Threat	7	4	-3	3	-18.5164	-10.8839
2034	4	'Images\snake41.tif'	Threat	7	4	-3	3	-19.3219	-11.6894
2034	5	'Images\snake26.tif'	Threat	7	6	-3	3	-3.23275	4.3998
2034	6	'Images\Foveating (4).tif'	Control	1	1	0	0	-27.5703	-17.2742
2034	7	'Images\spider1.tif'	Threat	7	6	-2	2	48.4357	56.9561
2034	8	'Images\Trypophobic17.tif'	Holes	6	6	-2	2	-26.4251	-17.9047
2034	9	'Images\Trypophobic14.tif'	Holes	2	6	0	0	0.582758	10.8789
2034	10	'Images\Foveating (8).tif'	Control	1	1	0	0	-8.83774	1.45838
2034	11	'Images\Trypophobic15.tif'	Holes	4	6	-2	2	-3.98905	4.53135
2034	12	'Images\Trypophobic19.tif'	Holes	5	4	-1	1	10.9146	20.3228
2034	13	'Images\Foveating (7).tif'	Control	1	1	1	1	3.20822	12.6165
2034	14	'Images\Foveating (3).tif'	Control	1	1	1	1	4.23427	13.6425
2034	15	'Images\Foveating (17).tif'	Control	1	1	0	0	12.1769	22.473
2034	16	'Images\Trypophobic9.tif'	Holes	6	5	-2	2	21.0115	29.5319
2034	17	'Images\snake43.tif'	Threat	7	5	-3	3	20.2663	27.8989
2034	18	'Images\Foveating (14).tif'	Control	1	1	0	0	2.53416	12.8303
2034	19	'Images\spider29.tif'	Threat	7	6	-3	3	-22.5884	-14.9558
2034	20	'Images\Trypophobic13.tif'	Holes	6	2	-1	1	26.1357	35.544
2034	21	'Images\Foveating (19).tif'	Control	1	1	0	0	-5.72614	4.56998
2034	22	'Images\snake4.tif'	Threat	7	6	-3	3	1.20896	8.84151
2034	23	'Images\spider55.tif'	Threat	7	5	-3	3	-0.830148	6.8024
2034	24	'Images\Foveating (11).tif'	Control	1	1	0	0	-17.841	-7.54488
2034	25	'Images\snake32.tif'	Threat	7	6	-3	3	-23.4637	-15.8312
2034	26	'Images\spider21.tif'	Threat	7	4	-2	2	32.0077	40.5281
2034	27	'Images\Foveating (15).tif'	Control	1	1	0	0	-31.279	-20.9829
2034	28	'Images\Trypophobic11.tif'	Holes	1	1	2	2	19.6544	28.1748
2034	29	'Images\Foveating (10).tif'	Control	1	1	0	0	-0.960169	9.33594
2034	30	'Images\snake57.tif'	Threat	7	6	-3	3	-9.47462	-1.84208
2034	31	'Images\Foveating (12).tif'	Control	1	1	-1	1	50.3709	59.7791
2034	32	'Images\Trypophobic3.tif'	Holes	3	6	-1	1	-8.35419	1.05407
2034	33	'Images\Foveating (9).tif'	Control	6	1	-1	1	32.0377	41.446
2034	34	'Images\Trypophobic2.tif'	Holes	4	4	-1	1	-18.821	-9.41275
2034	35	'Images\Trypophobic18.tif'	Holes	7	7	-2	2	-10.4904	-1.97004
2034	36	'Images\spider8.tif'	Threat	7	6	-3	3	6.75275	14.3853
2034	37	'Images\Foveating (5).tif'	Control	1	1	0	0	10.487	20.7831
2034	38	'Images\Foveating (6).tif'	Control	1	1	0	0	-18.3111	-8.01497
2034	39	'Images\Trypophobic8.tif'	Holes	6	5	-2	2	-2.0955	6.4249
2034	40	'Images\Foveating (1).tif'	Control	1	1	0	0	-10.9241	-0.62801
2034	41	'Images\snake22.tif'	Threat	7	5	-3	3	-20.1109	-12.4784
2034	42	'Images\Trypophobic7.tif'	Holes	3	2	-1	1	5.98766	15.3959
2034	43	'Images\Foveating (18).tif'	Control	1	1	0	0	-3.31417	6.98195
2034	44	'Images\spider14.tif'	Threat	7	6	-3	3	-28.1902	-20.5577
2034	45	'Images\spider22.tif'	Threat	7	4	-3	3	-8.00739	-0.37484
2034	46	'Images\Foveating (13).tif'	Control	1	1	0	0	-9.22823	1.06788
2034	47	'Images\Trypophobic16.tif'	Holes	4	3	-1	1	-19.2662	-9.85792
2034	48	'Images\Trypophobic4.tif'	Holes	6	6	-1	1	1.09496	10.5032
2034	49	'Images\Trypophobic5.tif'	Holes	1	1	0	0	-13.1432	-2.8471
2034	50	'Images\spider24.tif'	Threat	6	5	-3	3	22.4419	30.0744
2034	51	'Images\snake25.tif'	Threat	7	6	-3	3	-7.03946	0.59309
2034	52	'Images\Trypophobic20.tif'	Holes	6	4	4	4	-3.80926	2.93543
2034	53	'Images\snake40.tif'	Threat	7	6	-3	3	7.28925	14.9218
2034	54	'Images\spider42.tif'	Threat	6	5	-3	3	-4.54654	3.08601
2034	55	'Images\Trypophobic6.tif'	Holes	4	4	-2	2	-33.0122	-24.4918
2034	56	'Images\Foveating (2).tif'	Control	1	1	0	0	2.63471	12.9308
2034	57	'Images\snake28.tif'	Threat	7	5	-3	3	-14.1627	-6.53011
2034	58	'Images\Trypophobic10.tif'	Holes	5	2	-1	1	56.7084	66.1167
2034	59	'Images\Foveating (20).tif'	Control	1	1	0	0	-27.4215	-17.1254
2034	60	'Images\Foveating (16).tif'	Control	1	1	0	0	78.4957	88.7918
2035	1	'Images\snake32.tif'	Threat	2	2	-1	1	-41.799	-32.3908
2035	2	'Images\Trypophobic11.tif'	Holes	1	1	0	0	-20.359	-10.0629
2035	3	'Images\Foveating (2).tif'	Control	1	1	0	0	-28.6641	-18.368
2035	4	'Images\Foveating (7).tif'	Control	1	1	0	0	-8.90293	1.39319
2035	5	'Images\Foveating (5).tif'	Control	1	1	0	0	-0.0690872	10.227
2035	6	'Images\Trypophobic13.tif'	Holes	1	1	0	0	-26.663	-16.3669
2035	7	'Images\spider29.tif'	Threat	1	1	-1	1	-1.85261	7.55565
2035	8	'Images\Trypophobic12.tif'	Holes	1	1	0	0	-35.0822	-24.786
2035	9	'Images\Foveating (3).tif'	Control	1	1	0	0	-13.6873	-3.39122
2035	10	'Images\spider1.tif'	Threat	4	4	-1	1	24.5398	33.948
2035	11	'Images\spider22.tif'	Threat	2	2	-1	1	-17.2269	-7.81863
2035	12	'Images\snake4.tif'	Threat	3	2	-1	1	-32.8271	-23.4188
2035	13	'Images\Foveating (4).tif'	Control	2	1	-1	1	-21.9669	-12.5586
2035	14	'Images\spider8.tif'	Threat	2	1	-2	2	-4.61913	3.90127
2035	15	'Images\Foveating (6).tif'	Control	1	1	0	0	-30.3715	-20.0754
2035	16	'Images\snake43.tif'	Threat	1	2	0	0	-26.1785	-15.8824
2035	17	'Images\Foveating (18).tif'	Control	2	1	0	0	-24.8202	-14.5241
2035	18	'Images\Trypophobic5.tif'	Holes	1	1	0	0	-34.8597	-24.5636
[truncated: 522 more rows]

## Sheet: Experiment 2 - Image Statistics
Spatial Frequency at different spectral energy levels
Image	Category	Mean % pupil size change	10	30	50	70	90
Images\Trypophobic1.tif	Holes	-10.2223	2	3	9	17	54
Images\Trypophobic10.tif	Holes	-1.22092	3	9	13	19	40
Images\Trypophobic11.tif	Holes	-6.28506	2	2	2	12	17
Images\Trypophobic12.tif	Holes	-14.5172	1	2	5	23	38
Images\Trypophobic13.tif	Holes	-9.49503	2	5	7	26	103
Images\Trypophobic14.tif	Holes	-17.7032	2	2	2	8	85
Images\Trypophobic15.tif	Holes	-24.729	35	71	87	102	122
Images\Trypophobic16.tif	Holes	-4.44541	1	2	3	22	48
Images\Trypophobic17.tif	Holes	-23.287	2	3	20	39	66
Images\Trypophobic18.tif	Holes	-8.85734	4	6	12	17	41
Images\Trypophobic19.tif	Holes	-6.58643	2	2	3	15	55
Images\Trypophobic2.tif	Holes	-14.6329	2	3	7	18	45
Images\Trypophobic20.tif	Holes	-15.5389	2	16	23	30	59
Images\Trypophobic3.tif	Holes	-10.9256	5	14	19	28	50
Images\Trypophobic4.tif	Holes	-17.2368	3	12	21	35	67
Images\Trypophobic5.tif	Holes	-21.3357	2	4	6	17	65
Images\Trypophobic6.tif	Holes	-19.326	27	48	54	59	77
Images\Trypophobic7.tif	Holes	-7.5293	2	3	16	26	45
Images\Trypophobic8.tif	Holes	-7.12763	2	15	17	19	36
Images\Trypophobic9.tif	Holes	-2.94612	2	6	8	11	20
Images\Foveating (1).tif	Control	-2.00365	6	6	6	12	23
Images\Foveating (10).tif	Control	-8.64272	2	4	5	7	31
Images\Foveating (11).tif	Control	-3.49946	4	8	9	10	25
Images\Foveating (12).tif	Control	-16.957	18	18	19	19	42
Images\Foveating (13).tif	Control	-21.8587	16	17	19	22	46
Images\Foveating (14).tif	Control	-9.15372	12	13	16	21	37
Images\Foveating (15).tif	Control	-7.18409	4	7	10	15	30
Images\Foveating (16).tif	Control	-7.234	2	2	3	4	24
Images\Foveating (17).tif	Control	-16.8153	6	14	26	34	67
Images\Foveating (18).tif	Control	-11.9068	20	24	27	29	61
Images\Foveating (19).tif	Control	-1.16645	6	10	11	17	44
Images\Foveating (2).tif	Control	-15.0493	21	23	25	25	50
Images\Foveating (20).tif	Control	-12.5361	8	18	33	39	51
Images\Foveating (3).tif	Control	-1.40623	2	5	6	8	20
Images\Foveating (4).tif	Control	-16.6499	2	7	11	27	53
Images\Foveating (5).tif	Control	-1.48308	1	2	5	23	63
Images\Foveating (6).tif	Control	-12.2967	1	2	2	22	88
Images\Foveating (7).tif	Control	-5.53867	5	10	18	27	43
Images\Foveating (8).tif	Control	-5.15168	2	3	26	44	72
Images\Foveating (9).tif	Control	-6.25275	4	10	12	24	48
Images\snake22.tif	Threat	-10.1518	5	9	13	21	60
Images\snake25.tif	Threat	-13.4206	2	3	5	12	64
Images\snake26.tif	Threat	-11.3848	2	4	7	18	63
Images\snake28.tif	Threat	-14.4371	4	12	20	32	64
Images\snake32.tif	Threat	-16.325	4	16	33	55	86
Images\snake4.tif	Threat	-6.49546	1	2	3	11	59
Images\snake40.tif	Threat	-15.5392	2	6	11	17	38
Images\snake41.tif	Threat	-12.9248	2	3	6	11	39
Images\snake43.tif	Threat	-12.1278	5	17	32	52	87
Images\snake57.tif	Threat	-2.82442	1	2	3	8	40
Images\spider1.tif	Threat	6.59883	2	2	3	6	22
Images\spider14.tif	Threat	-11.0688	2	5	16	34	73
Images\spider21.tif	Threat	-12.458	3	4	6	10	39
Images\spider22.tif	Threat	8.22752	2	2	2	4	21
Images\spider24.tif	Threat	7.62486	2	2	5	11	31
Images\spider29.tif	Threat	-4.0999	3	6	8	13	31
Images\spider32.tif	Threat	-13.172	2	5	10	16	38
Images\spider42.tif	Threat	-12.8941	3	5	8	12	45
Images\spider55.tif	Threat	9.9372	1	2	2	3	10
Images\spider8.tif	Threat	-2.95944	2	2	4	10	33
